# Supplementary material for: Reductive coupling of azonaphthalenes for the synthesis of BINAMs via a diboron-enabled [5,5]-sigmatropic rearrangement
Source: Royal Society of Chemistry journal article supplement (doi:10.1039/d4sc06273f), 2024-12-13

# Supporting Information

## Reductive Coupling of Azonaphthalenes for the Synthesis of BINAMs via a Diboron-Enabled [5,5]-Sigmatropic Rearrangement

Liang-Wen Qi<sup>‡</sup>, Emmanuella Bema Twumasi<sup>‡</sup>, Xiao-Wei Li, Rui Li, Yixin Lu\*

*Department of Chemistry, National University of Singapore, Singapore 117543, Singapore*

### Table of contents

|                                                                          |    |
|--------------------------------------------------------------------------|----|
| General Information.....                                                 | 2  |
| General procedure for the synthesis of azonaphthalenes.....              | 3  |
| Reaction development and optimization.....                               | 13 |
| Synthesis of BINAM derivatives via [5,5]-sigmatropic rearrangements..... | 15 |
| Gram scale synthesis of BINAM derivatives.....                           | 29 |
| Cleavage of <i>N-N</i> Bond — Accessing free BINAM.....                  | 29 |
| Crystal Structure of <b>2z</b> .....                                     | 32 |
| References.....                                                          | 44 |
| Copies of NMR Spectra.....                                               | 45 |

## General Information

Unless otherwise stated, all reagents and solvents were purchased from reputable commercial sources and used without further purification. Flash column chromatography was performed on silica gel with a particle size range of 200-300 mesh. Analytical thin-layer chromatography was performed on precoated silica gel plates (60F-254) and visualized with a UV light source emitting at 254 nm. Both  $^1\text{H}$  and  $^{13}\text{C}$  NMR spectra were acquired on a Bruker spectrometer, operating at either 400 MHz or 500 MHz and were referenced to tetramethylsilane as the internal standard. Chemical shifts were reported as parts per million (ppm) relative to the signals of  $\text{CDCl}_3$  and  $\text{DMSO-}d_6$ . Additionally, chemical constants were expressed in Hertz (Hz), measured downfield from tetramethylsilane. Anhydrous 1,2-dimethoxyethane was purchased from Sigma-Aldrich and used in its unaltered state. High-resolution mass spectrometric analysis reported as the mass-to-charge ratio ( $m/z$ ), was performed using Agilent 7200 QTOF and Bruker MicroTOF-QII spectrometers.

## Substrates explored in the manuscript

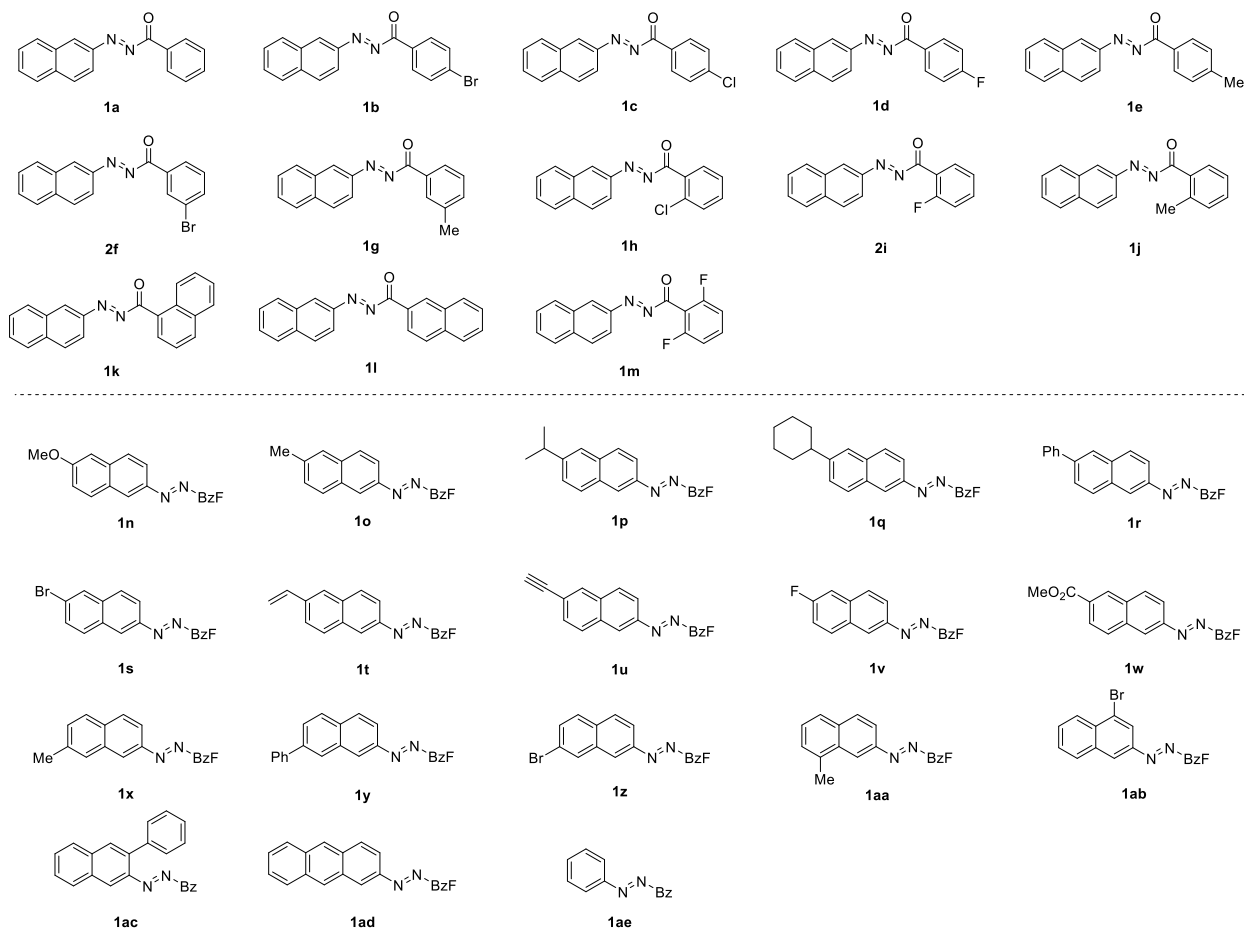

## General procedure for the synthesis of azonaphthalenes

Azonaphthalenes were prepared according to the reported literature.<sup>1-3</sup>

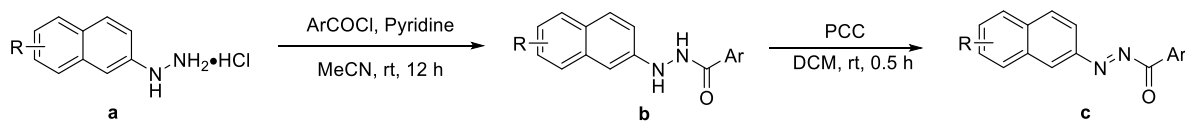

To a solution of 2-naphthylhydrazine hydrochloride (10 mmol) in acetonitrile (20 mL), benzoyl chloride (11 mmol) and pyridine (1.8 mL, 22 mmol) were added and stirred overnight at room temperature. After completion of the reaction, the solvent was concentrated in vacuo and diluted with ethyl acetate (50 mL). The organic phase was carefully washed with saturated aqueous sodium bicarbonate (50 mL) and extracted with ethyl acetate (3 x 50 mL). The combined organic phase was washed with brine, dried over sodium sulphate. After removal of the solvent, the crude

product was then purified by flash chromatography on silica gel eluted with *n*-hexane: ethyl acetate (5:1 to 2:1).

Pyridinium chlorochromate (PCC) (5 mmol) was added to a solution of naphthyl hydrazide (5 mmol) in dichloromethane (20 mL) and the reaction mixture was stirred at room temperature until the complete consumption of the starting material. The mixture was filtered, concentrated and purified by flash chromatography eluting with *n*-hexane: ethyl acetate (10:1).

**(*E*)-(4-fluorophenyl)(naphthalen-2-yl diazenyl) methanone (1d)**

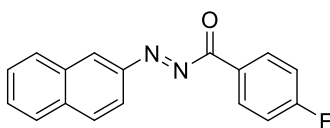

**1d**

Red solid, 55% yield;  $R_f$  0.61 (*n*-hexane: ethyl acetate = 10:1).  **$^1\text{H NMR}$  (500 MHz,  $\text{CDCl}_3$ )**  $\delta$  8.68 (s, 1H), 8.25 – 8.16 (m, 2H), 8.09 (d,  $J = 8.0$  Hz, 1H), 8.02 (dd,  $J = 8.9, 1.9$  Hz, 1H), 7.96 (dd,  $J = 8.4, 3.6$  Hz, 2H), 7.70 – 7.62 (m, 2H), 7.24 (t,  $J = 8.6$  Hz, 2H).  **$^{13}\text{C NMR}$  (126 MHz,  $\text{CDCl}_3$ )**  $\delta$  180.4, 166.6 (d,  $J = 257.3$  Hz), 149.8, 136.0, 133.5 (2C) (d,  $J = 9.6$  Hz), 133.2, 132.3, 130.0, 129.6, 129.1, 128.1, 127.7 (d,  $J = 3.1$  Hz), 127.3, 116.3 (2C) (d,  $J = 22.1$  Hz), 115.4. **HRMS (ESI)** calcd for  $[\text{M}+\text{H}]^+$   $\text{C}_{17}\text{H}_{12}\text{N}_2\text{O}$ ,  $m/z$ : 279.0930, found: 279.0928.

**(*E*)-(naphthalen-2-yl diazenyl) (m-tolyl)methanone (1g)**

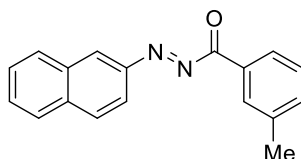

**1g**

Red solid, 47% yield;  $R_f$  0.50 (*n*-hexane: ethyl acetate = 10:1).  **$^1\text{H NMR}$  (500 MHz,  $\text{CDCl}_3$ )**  $\delta$  8.67 (d,  $J = 1.5$  Hz, 1H), 8.08 (d,  $J = 7.9$  Hz, 1H), 8.04 (dd,  $J = 8.9, 1.9$  Hz, 1H), 7.99 – 7.92 (m, 4H), 7.69 – 7.61 (m, 2H), 7.50 (d,  $J = 7.6$  Hz, 1H), 7.44 (t,  $J = 7.6$  Hz, 1H), 2.46 (s, 3H).  **$^{13}\text{C NMR}$  (126 MHz,  $\text{CDCl}_3$ )**  $\delta$  182.2, 149.8, 138.8, 135.9, 135.4, 133.2, 131.8, 131.1, 131.0, 129.9, 129.2, 128.9, 128.8, 128.1, 127.9, 127.2, 115.5, 21.4. **HRMS (ESI)** calcd for  $[\text{M}+\text{H}]^+$   $\text{C}_{18}\text{H}_{15}\text{N}_2\text{O}$ ,  $m/z$ : 275.1179, found: 275.1181.

**(*E*)-(2-fluorophenyl) (naphthalen-2-yl diazenyl) methanone (1i)**

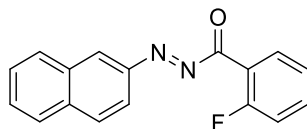

1i

Red solid, 51% yield;  $R_f$  0.53 (*n*-hexane: ethyl acetate = 10:1).  $^1\text{H NMR}$  (400 MHz,  $\text{CDCl}_3$ )  $\delta$  8.61 (d,  $J = 1.9$  Hz, 1H), 8.19 – 8.12 (m, 1H), 8.09 – 8.02 (m, 1H), 8.01 (d,  $J = 1.9$  Hz, 1H), 7.98 – 7.92 (m, 2H), 7.71 – 7.59 (m, 3H), 7.39 – 7.33 (m, 1H), 7.24 – 7.16 (m, 1H).  $^{13}\text{C NMR}$  (126 MHz,  $\text{CDCl}_3$ )  $\delta$  180.8, 162.5 (d,  $J = 261.1$  Hz), 149.8, 136.3 (d,  $J = 9.1$  Hz), 135.9, 133.2, 132.6, 131.5, 129.9, 129.5, 128.9, 128.1, 127.2, 124.6 (d,  $J = 3.6$  Hz), 119.6 (d,  $J = 11.4$  Hz), 117.2 (d,  $J = 22.1$  Hz), 115.7. **HRMS (ESI)** calcd for  $[\text{M}+\text{H}]^+$   $\text{C}_{17}\text{H}_{12}\text{FN}_2\text{O}$ ,  $m/z$ : 279.0928, found: 279.0928.

**(E)-naphthalen-1-yl(naphthalen-2-yl) diazenyl methanone (1k)**

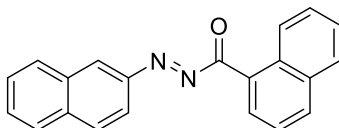

1k

Bright orange solid, 45% yield;  $R_f$  0.55 (*n*-hexane: ethyl acetate = 10:1).  $^1\text{H NMR}$  (400 MHz,  $\text{CDCl}_3$ )  $\delta$  9.24 (dd,  $J = 8.7, 1.0$  Hz, 1H), 8.65 (d,  $J = 1.9$  Hz, 1H), 8.36 (dd,  $J = 7.3, 1.3$  Hz, 1H), 8.14 (d,  $J = 8.3$  Hz, 1H), 8.08 – 8.02 (m, 2H), 7.94 (t,  $J = 8.3$  Hz, 3H), 7.77 – 7.70 (m, 1H), 7.67 – 7.58 (m, 3H), 7.58 – 7.53 (m, 1H).  $^{13}\text{C NMR}$  (126 MHz,  $\text{CDCl}_3$ )  $\delta$  183.2, 149.9, 136.0, 135.6, 134.2, 133.6, 133.4, 131.8 (2C), 130.0, 129.6, 129.1, 129.0, 128.9, 128.2, 127.5, 127.3, 127.0, 126.3, 124.5, 115.8. **HRMS (ESI)** calcd for  $[\text{M}+\text{H}]^+$   $\text{C}_{21}\text{H}_{15}\text{N}_2\text{O}$ ,  $m/z$ : 311.1179, found: 311.1182.

**(E)-naphthalen-2-yl(naphthalen-2-yl) diazenyl methanone (1l)**

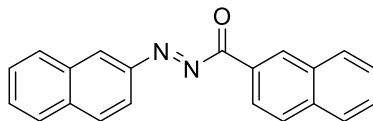

1l

Bright orange solid, 39% yield;  $R_f$  0.44 (*n*-hexane: ethyl acetate = 10:1).  $^1\text{H NMR}$  (400 MHz,  $\text{CDCl}_3$ )  $\delta$  8.68 (d,  $J = 10.1$  Hz, 2H), 8.18 (dd,  $J = 8.6, 1.6$  Hz, 1H), 8.11 – 8.06 (m, 2H), 8.01 – 7.90 (m, 5H), 7.67 – 7.55 (m, 4H).  $^{13}\text{C NMR}$  (126 MHz,  $\text{CDCl}_3$ )  $\delta$  182.2, 150.3, 136.6, 136.3, 133.7, 133.6, 132.8, 132.5, 130.3, 130.2, 129.9, 129.7, 129.4, 129.3, 128.9, 128.5, 128.4, 127.7, 127.4, 125.6, 116.0. **HRMS (ESI)** calcd for  $[\text{M}+\text{H}]^+$   $\text{C}_{21}\text{H}_{15}\text{N}_2\text{O}$ ,  $m/z$ : 311.1179, found: 311.1182.

**(E)-(2,6-difluorophenyl) (naphthalen-2-yl) diazenyl methanone (1m)**

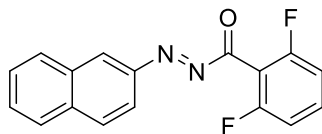

**1m**

Bright orange solid, 54% yield,  $R_f$  0.47 (*n*-hexane: ethyl acetate = 10:1).  $^1\text{H NMR}$  (500 MHz,  $\text{CDCl}_3$ )  $\delta$  8.58 (s, 1H), 8.05 – 8.00 (m, 2H), 7.93 (d,  $J = 9.3$  Hz, 2H), 7.71 – 7.52 (m, 3H), 7.05 (t,  $J = 8.4$  Hz, 2H).  $^{13}\text{C NMR}$  (126 MHz,  $\text{CDCl}_3$ )  $\delta$  177.7, 161.3 (2C) (d,  $J = 258.2$  Hz), 149.5, 136.3, 134.4, 134.3 (t,  $J = 10.6$  Hz), 133.1, 132.8, 130.1, 129.6, 129.3, 128.1, 127.3, 115.7, 112.3 (2C) (dd,  $J = 21.6, 3.8$  Hz). **HRMS (ESI)** calcd for  $[\text{M}+\text{H}]^+$   $\text{C}_{17}\text{H}_{11}\text{N}_2\text{O}$ ,  $m/z$ : 297.0834, found: 297.0837.

**(E)-(2-fluorophenyl) ((6-methoxynaphthalen-2-yl) diazenyl) methanone (1n)**

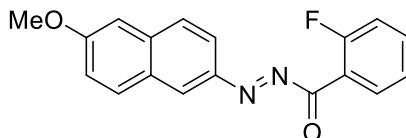

**1n**

Red solid, 45% yield;  $R_f$  0.26 (*n*-hexane: ethyl acetate = 10:1).  $^1\text{H NMR}$  (500 MHz,  $\text{CDCl}_3$ )  $\delta$  8.53 (d,  $J = 2.0$  Hz, 1H), 8.16 – 8.11 (m, 1H), 8.00 (dd,  $J = 8.9, 2.0$  Hz, 1H), 7.95 (d,  $J = 8.9$  Hz, 1H), 7.82 (d,  $J = 8.9$  Hz, 1H), 7.68 – 7.64 (m, 1H), 7.37 – 7.33 (m, 1H), 7.28 – 7.24 (m, 1H), 7.24 – 7.22 (m, 1H), 7.22 – 7.18 (m, 1H), 4.00 (s, 3H).  $^{13}\text{C NMR}$  (126 MHz,  $\text{CDCl}_3$ )  $\delta$  180.8 (d,  $J = 5.9$  Hz), 162.5 (d,  $J = 260.9$  Hz), 160.2, 148.5, 137.8, 136.1 (d,  $J = 9.0$  Hz), 132.6 (2C), 131.6, 128.4, 128.2, 126.5, 124.5 (d,  $J = 3.5$  Hz), 119.9, 117.1 (d,  $J = 22.2$  Hz), 116.5, 106.4, 55.5. **HRMS (ESI)** calcd for  $[\text{M}+\text{H}]^+$   $\text{C}_{18}\text{H}_{14}\text{FN}_2\text{O}_2$ ,  $m/z$ : 309.1035, found: 309.1035.

**(E)-(2-fluorophenyl) ((6-methylnaphthalen-2-yl) diazenyl) methanone (1o)**

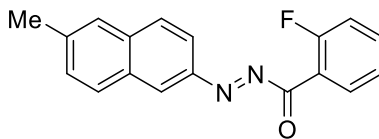

**1o**

Red orange solid, 57% yield;  $R_f$  0.53 (*n*-hexane: ethyl acetate = 10:1).  $^1\text{H NMR}$  (400 MHz,  $\text{CDCl}_3$ )  $\delta$  8.54 (d,  $J = 1.9$  Hz, 1H), 8.19 – 8.08 (m, 1H), 8.01 – 7.90 (m, 2H), 7.82 (d,  $J = 8.9$  Hz, 1H), 7.68

(s, 1H), 7.67 – 7.60 (m, 1H), 7.42 (dd,  $J = 8.4, 1.7$  Hz, 1H), 7.35 – 7.29 (m, 1H), 7.17 (dd,  $J = 10.0, 8.6$  Hz, 1H), 2.56 (s, 3H).  $^{13}\text{C}$  NMR (126 MHz,  $\text{CDCl}_3$ )  $\delta$  180.8 (d,  $J = 5.3$  Hz), 162.5 (d,  $J = 261.0$  Hz), 149.3, 139.3 (2C), 136.2, 132.6, 131.6, 131.4, 129.7, 129.5, 128.8, 127.2, 124.6 (d,  $J = 3.5$  Hz), 119.8 (d,  $J = 11.4$  Hz), 117.2 (d,  $J = 22.2$  Hz), 115.8, 22.0. HRMS (ESI) calcd for  $[\text{M}+\text{H}]^+$   $\text{C}_{18}\text{H}_{14}\text{FN}_2\text{O}$ ,  $m/z$ : 293.1085, found: 293.1085.

**(E)-(2-fluorophenyl) ((6-isopropynaphthalen-2-yl)diazenyl) methanone (1p)**

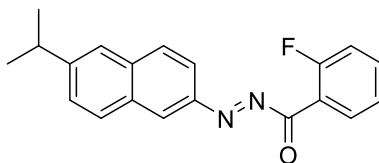

**1p**

Red solid, 38% yield;  $R_f$  0.59 (*n*-hexane: ethyl acetate = 10:1).  $^1\text{H}$  NMR (400 MHz,  $\text{CDCl}_3$ )  $\delta$  8.55 (d,  $J = 1.9$  Hz, 1H), 8.17 – 8.09 (m, 1H), 7.97 (dd,  $J = 8.8, 2.1$  Hz, 2H), 7.87 (d,  $J = 8.9$  Hz, 1H), 7.72 (s, 1H), 7.69 – 7.60 (m, 1H), 7.50 (dd,  $J = 8.5, 1.8$  Hz, 1H), 7.33 (t,  $J = 7.6$  Hz, 1H), 7.22 – 7.13 (m, 1H), 3.17 – 3.08 (m, 1H), 1.37 (d,  $J = 6.9$  Hz, 6H).  $^{13}\text{C}$  NMR (126 MHz,  $\text{CDCl}_3$ )  $\delta$  180.8 (d,  $J = 5.9$  Hz), 162.5 (d,  $J = 261.0$  Hz), 150.1, 149.4, 136.3, 136.2 (d,  $J = 9.0$  Hz), 132.6, 131.7, 131.6, 129.9, 129.2, 127.1, 124.6 (d,  $J = 3.7$  Hz), 124.5, 119.8 (d,  $J = 11.6$  Hz), 117.2 (d,  $J = 22.2$  Hz), 115.7, 34.5, 23.8 (2C). HRMS (ESI) calcd for  $[\text{M}+\text{H}]^+$   $\text{C}_{20}\text{H}_{18}\text{FN}_2\text{O}$ ,  $m/z$ : 321.1398, found: 321.1398.

**(E)-((6-cyclohexylnaphthalen-2-yl)diazenyl) (2-fluorophenyl) methanone (1q)**

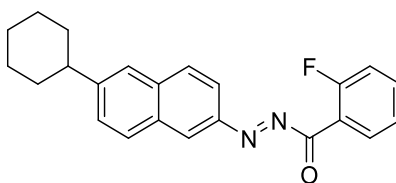

**1q**

Red solid, 61% yield;  $R_f$  0.48 (*n*-hexane: ethyl acetate = 10:1).  $^1\text{H}$  NMR (500 MHz,  $\text{CDCl}_3$ )  $\delta$  8.54 (d,  $J = 2.0$  Hz, 1H), 8.15 – 8.10 (m, 1H), 7.99 – 7.95 (m, 2H), 7.86 (d,  $J = 8.9$  Hz, 1H), 7.71 (s, 1H), 7.67 – 7.61 (m, 1H), 7.48 (dd,  $J = 8.4, 1.8$  Hz, 1H), 7.36 – 7.31 (m, 1H), 7.22 – 7.15 (m, 1H), 2.76 – 2.67 (m, 1H), 2.03 – 1.97 (m, 2H), 1.91 (d,  $J = 12.8$  Hz, 2H), 1.81 (d,  $J = 12.7$  Hz, 1H), 1.60 – 1.40 (m, 5H).  $^{13}\text{C}$  NMR (126 MHz,  $\text{CDCl}_3$ )  $\delta$  180.8 (d,  $J = 5.7$  Hz), 162.5 (d,  $J = 261.2$  Hz), 149.4, 149.3, 136.3, 136.2 (d,  $J = 9.0$  Hz), 132.6, 131.7, 131.6, 129.8, 129.2, 127.6, 124.9,

124.5 (d,  $J = 3.7$  Hz), 119.8 (d,  $J = 11.3$  Hz), 117.2 (d,  $J = 22.2$  Hz), 115.6, 44.9, 34.3 (2C), 26.9 (2C), 26.1. **HRMS (ESI)** calcd for  $[M+H]^+$   $C_{23}H_{22}FN_2O$ ,  $m/z$ : 361.1711, found: 361.1712.

**(E)-(2-fluorophenyl)((6-phenylnaphthalen-2-yl)diazenyl)methanone (1r)**

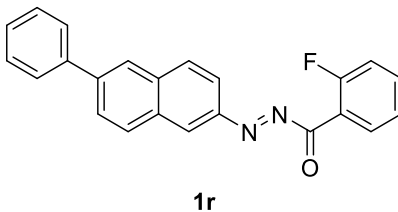

Red solid, 49% yield;  $R_f$  0.45 (*n*-hexane: ethyl acetate = 10:1).  **$^1H$  NMR (500 MHz,  $CDCl_3$ )**  $\delta$  8.63 (d,  $J = 1.9$  Hz, 1H), 8.18 – 8.10 (m, 3H), 8.08 – 8.02 (m, 1H), 8.00 (d,  $J = 8.9$  Hz, 1H), 7.88 (dd,  $J = 8.5, 1.8$  Hz, 1H), 7.78 (d,  $J = 7.0$  Hz, 2H), 7.70 – 7.65 (m, 1H), 7.55 (t,  $J = 7.7$  Hz, 2H), 7.45 (t,  $J = 7.4$  Hz, 1H), 7.37 (t,  $J = 7.6$  Hz, 1H), 7.21 (dd,  $J = 10.4, 8.5$  Hz, 1H).  **$^{13}C$  NMR (126 MHz,  $CDCl_3$ )**  $\delta$  180.8 (d,  $J = 5.8$  Hz), 162.5 (d,  $J = 261.0$  Hz), 149.8, 141.7, 140.4, 136.3 (d,  $J = 9.2$  Hz), 132.6, 132.3, 131.3, 130.5, 129.8, 129.1 (2C), 128.9, 128.1, 127.5 (2C), 126.9, 125.9, 124.6 (d,  $J = 3.5$  Hz), 119.7 (d,  $J = 11.1$  Hz), 117.2 (d,  $J = 22.2$  Hz), 116.2. **HRMS (ESI)** calcd for  $[M+H]^+$   $C_{23}H_{16}FN_2O$ ,  $m/z$ : 355.1241, found: 355.1244.

**(E)-((6-bromonaphthalen-2-yl)diazenyl)(2-fluorophenyl) methanone (1s)**

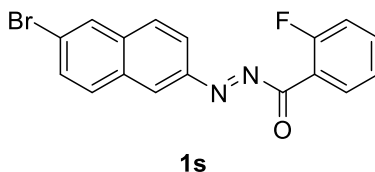

Red solid, 53% yield,  $R_f$  0.54 (*n*-hexane: ethyl acetate = 10:1).  **$^1H$  NMR (400 MHz,  $CDCl_3$ )**  $\delta$  8.45 (d,  $J = 1.9$  Hz, 1H), 8.08 – 8.01 (m, 1H), 8.00 (d,  $J = 1.9$  Hz, 1H), 7.95 – 7.90 (m, 1H), 7.82 (d,  $J = 8.7$  Hz, 1H), 7.76 (d,  $J = 8.9$  Hz, 1H), 7.61 – 7.55 (m, 2H), 7.30 – 7.23 (m, 1H), 7.13 – 7.06 (m, 1H).  **$^{13}C$  NMR (126 MHz,  $CDCl_3$ )**  $\delta$  180.8 (d,  $J = 5.6$  Hz), 162.5 (d,  $J = 260.9$  Hz), 149.8, 136.7, 136.4 (d,  $J = 9.1$  Hz), 132.6, 131.6, 131.3, 130.8, 130.7, 130.3, 128.6, 124.7 (d,  $J = 3.6$  Hz), 123.3, 119.4 (d,  $J = 10.7$  Hz), 117.2 (d,  $J = 22.6$  Hz), 117.1. **HRMS (ESI)** calcd for  $[M+H]^+$   $C_{17}H_{11}BrFN_2O$ ,  $m/z$ : 357.0033, found: 357.0033.

**(E)-(2-fluorophenyl)((6-vinylnaphthalen-2-yl)diazenyl) methanone (1t)**



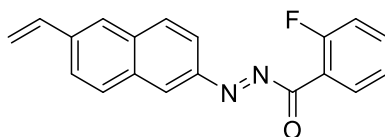

**1t**

Red solid, 38% yield;  $R_f$  0.50 (*n*-hexane: ethyl acetate = 10:1).  $^1\text{H NMR}$  (500 MHz,  $\text{CDCl}_3$ )  $\delta$  8.53 (d,  $J = 2.0$  Hz, 1H), 8.16 – 8.09 (m, 1H), 8.02 – 7.96 (m, 2H), 7.89 (d,  $J = 8.9$  Hz, 1H), 7.82 (d,  $J = 1.6$  Hz, 1H), 7.73 (dd,  $J = 8.5, 1.7$  Hz, 1H), 7.65 (d,  $J = 8.4$  Hz, 1H), 7.38 – 7.31 (m, 1H), 7.21 – 7.15 (m, 1H), 6.91 (dd,  $J = 17.6, 10.9$  Hz, 1H), 5.97 (d,  $J = 17.6$  Hz, 1H), 5.45 (d,  $J = 10.9$  Hz, 1H).  $^{13}\text{C NMR}$  (126 MHz,  $\text{CDCl}_3$ )  $\delta$  180.8 (d,  $J = 5.8$  Hz), 162.5 (d,  $J = 261.1$  Hz), 149.8, 138.0, 136.5, 136.3 (d,  $J = 9.1$  Hz), 136.2, 132.8, 132.6, 131.1, 130.3, 129.6, 126.3, 124.6 (2C), 119.7 (d,  $J = 11.1$  Hz), 117.2 (d,  $J = 22.3$  Hz), 116.3, 116.1. **HRMS (ESI)** calcd for  $[\text{M}+\text{H}]^+$   $\text{C}_{19}\text{H}_{14}\text{FN}_2\text{O}$ ,  $m/z$ : 305.1085, found: 305.1090.

**(E)-((6-ethylnaphthalen-2-yl)diazenyl)(2-fluorophenyl) methanone (1u)**

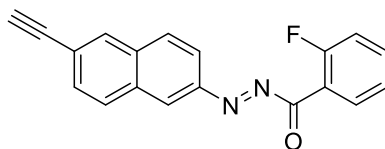

**1u**

Red solid, 65% yield;  $R_f$  0.46 (*n*-hexane: ethyl acetate = 10:1).  $^1\text{H NMR}$  (500 MHz,  $\text{CDCl}_3$ )  $\delta$  8.56 (d,  $J = 2.0$  Hz, 1H), 8.18 – 8.11 (m, 1H), 8.09 (d,  $J = 1.4$  Hz, 1H), 8.05 – 7.97 (m, 2H), 7.90 (d,  $J = 8.9$  Hz, 1H), 7.71 – 7.62 (m, 2H), 7.38 – 7.32 (m, 1H), 7.20 (dd,  $J = 10.0, 8.6$  Hz, 1H), 3.28 (s, 1H).  $^{13}\text{C NMR}$  (126 MHz,  $\text{CDCl}_3$ )  $\delta$  180.8 (d,  $J = 6.0$  Hz), 162.5 (d,  $J = 260.9$  Hz), 150.2, 136.4 (d,  $J = 8.9$  Hz), 135.3, 132.8 (2C), 132.6, 132.2, 130.7, 129.9 (d,  $J = 2.6$  Hz), 129.4, 124.7 (d,  $J = 3.6$  Hz), 122.5, 119.4 (d,  $J = 11.2$  Hz), 117.2 (d,  $J = 22.2$  Hz), 116.8, 83.5, 79.3. **HRMS (ESI)** calcd for  $[\text{M}+\text{H}]^+$   $\text{C}_{19}\text{H}_{12}\text{FN}_2\text{O}$ ,  $m/z$ : 303.0928, found: 303.0929.

**(E)-((6-fluoronaphthalen-2-yl)diazenyl)(2-fluorophenyl) methanone (1v)**

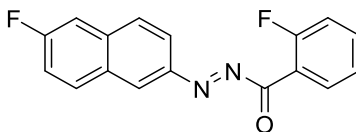

**1v**

Bright orange solid, 54% yield;  $R_f$  0.50 (*n*-hexane: ethyl acetate = 10:1).  $^1\text{H NMR}$  (500 MHz,  $\text{CDCl}_3$ )  $\delta$  8.56 (d,  $J = 1.9$  Hz, 1H), 8.16 – 8.10 (m, 1H), 8.06 – 8.00 (m, 2H), 7.86 (d,  $J = 8.9$  Hz,

1H), 7.69 – 7.62 (m, 1H), 7.53 (dd,  $J = 9.6, 2.5$  Hz, 1H), 7.39 – 7.31 (m, 2H), 7.20 – 7.15 (m, 1H).  $^{13}\text{C}$  NMR (126 MHz,  $\text{CDCl}_3$ )  $\delta$  180.8 (d,  $J = 5.8$  Hz), 162.5 (d,  $J = 261.0$  Hz), 162.4 (d,  $J = 251.2$  Hz), 149.4 (d,  $J = 2.5$  Hz), 137.0 (d,  $J = 9.6$  Hz), 136.4 (d,  $J = 9.1$  Hz), 132.6, 132.5 (d,  $J = 9.4$  Hz), 131.1, 130.1, 128.8 (d,  $J = 5.3$  Hz), 124.6 (d,  $J = 3.7$  Hz), 119.5 (d,  $J = 11.3$  Hz), 117.6 (d,  $J = 25.3$  Hz), 117.2 (d,  $J = 22.2$  Hz), 117.0, 111.7 (d,  $J = 20.9$  Hz). HRMS (ESI) calcd for  $[\text{M}+\text{H}]^+$   $\text{C}_{17}\text{H}_{11}\text{F}_2\text{N}_2\text{O}$ ,  $m/z$ : 297.0834, found: 297.0837.

**Methyl (*E*)-6-((2-fluorobenzoyl)diazenyl)-2-naphthoate (1w)**

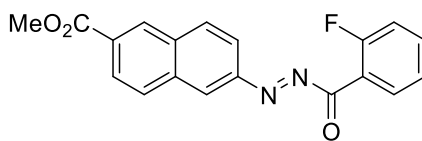

1w

Red solid, 63% yield;  $R_f$  0.29 (*n*-hexane: ethyl acetate = 10:1).  $^1\text{H}$  NMR (500 MHz,  $\text{CDCl}_3$ )  $\delta$  8.67 (s, 1H), 8.60 (d,  $J = 1.5$  Hz, 1H), 8.20 – 8.12 (m, 2H), 8.11 – 8.07 (m, 1H), 8.07 – 8.04 (m, 2H), 7.72 – 7.59 (m, 1H), 7.41 – 7.33 (m, 1H), 7.23 – 7.15 (m, 1H), 4.03 (s, 3H).  $^{13}\text{C}$  NMR (126 MHz,  $\text{CDCl}_3$ )  $\delta$  180.8 (d,  $J = 6.0$  Hz), 166.7, 162.6 (d,  $J = 261.1$  Hz), 150.9, 136.5 (d,  $J = 9.1$  Hz), 135.4, 134.9, 132.8, 132.5, 130.9 (d,  $J = 14.6$  Hz), 130.2, 130.0, 129.9, 126.6, 124.7 (d,  $J = 3.6$  Hz), 119.3 (d,  $J = 11.3$  Hz), 117.2 (d,  $J = 22.2$  Hz), 116.8, 52.5. HRMS (ESI) calcd for  $[\text{M}+\text{H}]^+$   $\text{C}_{19}\text{H}_{14}\text{FN}_2\text{O}_3$ ,  $m/z$ : 337.0983, found: 337.0985.

**(*E*)-(2-fluorophenyl)((7-methylnaphthalen-2-yl)diazenyl) methanone (1x)**

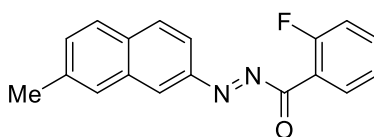

1x

Red solid, 59% yield,  $R_f$  0.55 (*n*-hexane: ethyl acetate = 10:1).  $^1\text{H}$  NMR (400 MHz,  $\text{CDCl}_3$ )  $\delta$  8.50 (d,  $J = 1.9$  Hz, 1H), 8.15 – 8.09 (m, 1H), 7.92 (dd,  $J = 8.9, 1.9$  Hz, 1H), 7.87 (d,  $J = 8.9$  Hz, 1H), 7.81 (d,  $J = 8.4$  Hz, 2H), 7.67 – 7.60 (m, 1H), 7.46 (dd,  $J = 8.3, 1.8$  Hz, 1H), 7.36 – 7.30 (m, 1H), 7.21 – 7.15 (m, 1H), 2.55 (s, 3H).  $^{13}\text{C}$  NMR (126 MHz,  $\text{CDCl}_3$ )  $\delta$  180.9 (d,  $J = 5.7$  Hz), 162.5 (d,  $J = 261.1$  Hz), 149.9, 137.1, 136.3 (d,  $J = 8.9$  Hz), 134.2, 133.4, 132.6, 131.2, 131.1, 129.2, 128.9, 127.9, 124.6 (d,  $J = 3.6$  Hz), 119.7 (d,  $J = 10.9$  Hz), 117.2 (d,  $J = 22.2$  Hz), 114.8, 21.7. HRMS (ESI) calcd for  $[\text{M}+\text{H}]^+$   $\text{C}_{18}\text{H}_{14}\text{FN}_2\text{O}$ ,  $m/z$ : 293.1086, found: 293.1085.

**(E)-(2-fluorophenyl)((7-phenylnaphthalen-2-yl)diazenyl) methanone (1y)**

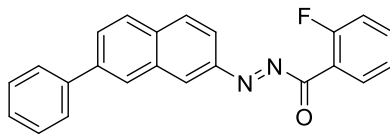

**1y**

Red solid, 51% yield;  $R_f$  0.50 (*n*-hexane: ethyl acetate = 10:1).  $^1\text{H NMR}$  (400 MHz,  $\text{CDCl}_3$ )  $\delta$  8.55 (d,  $J = 1.8$  Hz, 1H), 8.13 (d,  $J = 1.8$  Hz, 1H), 8.07 – 8.03 (m, 1H), 7.92 – 7.84 (m, 3H), 7.81 (dd,  $J = 8.5, 1.8$  Hz, 1H), 7.68 – 7.64 (m, 2H), 7.59 – 7.54 (m, 1H), 7.46 – 7.40 (m, 2H), 7.36 – 7.31 (m, 1H), 7.28 – 7.23 (m, 1H), 7.12 – 7.07 (m, 1H).  $^{13}\text{C NMR}$  (126 MHz,  $\text{CDCl}_3$ )  $\delta$  180.9 (d,  $J = 5.8$  Hz), 162.6 (d,  $J = 261.0$  Hz), 150.1, 140.3, 140.0, 136.4 (d,  $J = 9.0$  Hz), 135.0, 133.5, 132.6, 132.1, 131.7, 129.8, 129.6 (d,  $J = 15.7$  Hz), 129.3, 129.0, 128.6, 127.9, 127.6, 127.5, 124.6 (d,  $J = 3.5$  Hz), 117.2 (d,  $J = 22.2$  Hz), 116.4, 115.8. **HRMS (ESI)** calcd for  $[\text{M}+\text{H}]^+$   $\text{C}_{23}\text{H}_{16}\text{FN}_2\text{O}$ ,  $m/z$ : 355.1241, found: 355.1241.

**(E)-((7-bromonaphthalen-2-yl)diazenyl)(2-fluorophenyl) methanone (1z)**

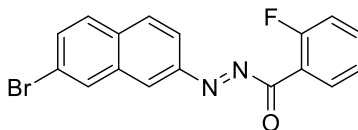

**1z**

Red solid, 57% yield,  $R_f$  0.58 (*n*-hexane: ethyl acetate = 10:1).  $^1\text{H NMR}$  (500 MHz,  $\text{CDCl}_3$ )  $\delta$  8.61 (d,  $J = 1.9$  Hz, 1H), 8.20 – 8.10 (m, 2H), 8.07 – 8.01 (m, 1H), 7.93 (d,  $J = 8.8$  Hz, 1H), 7.87 (d,  $J = 8.9$  Hz, 1H), 7.75 – 7.66 (m, 2H), 7.60 – 7.52 (m, 2H).  $^{13}\text{C NMR}$  (126 MHz,  $\text{CDCl}_3$ )  $\delta$  180.8 (d,  $J = 5.9$  Hz), 162.6 (d,  $J = 261.1$  Hz), 150.2, 136.5 (d,  $J = 9.1$  Hz), 134.3, 134.2, 132.5, 132.1, 131.7, 129.8, 129.7, 129.5, 124.7 (d,  $J = 3.6$  Hz), 121.3, 119.3, 117.2 (d,  $J = 22.2$  Hz), 116.4. **HRMS (ESI)** calcd for  $[\text{M}+\text{H}]^+$   $\text{C}_{17}\text{H}_{11}\text{BrFN}_2\text{O}$ ,  $m/z$ : 357.0033, found: 357.0032.

**(E)-(anthracen-2-yl)diazenyl (2-fluorophenyl)methanone (1ad)**

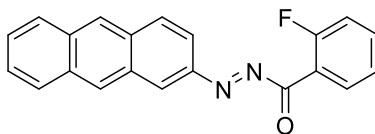

**1ad**

Orange solid, 29%;  $R_f$  0.55 (*n*-hexane: ethyl acetate = 10:1).  **$^1\text{H}$  NMR (500 MHz,  $\text{CDCl}_3$ )**  $\delta$  8.80 (s, 1H), 8.65 (s, 1H), 8.47 (s, 1H), 8.17 – 8.12 (m, 1H), 8.10 – 8.03 (m, 3H), 8.00 – 7.94 (m, 1H), 7.65 (dd,  $J = 13.4, 7.2$  Hz, 1H), 7.61 – 7.52 (m, 2H), 7.35 (t,  $J = 7.7$  Hz, 1H), 7.23 – 7.16 (m, 1H).  **$^{13}\text{C}$  NMR (126 MHz,  $\text{CDCl}_3$ )**  $\delta$  180.8 (d,  $J = 5.8$  Hz), 162.5 (d,  $J = 261.0$  Hz), 149.6, 136.2 (d,  $J = 9.1$  Hz), 135.3, 133.5, 132.9, 132.6, 132.3, 130.9, 130.1, 129.7, 128.5 (d,  $J = 28.9$  Hz), 128.2, 127.1, 126.8, 126.4, 125.4, 124.6 (d,  $J = 3.7$  Hz), 117.2 (d,  $J = 22.3$  Hz), 114.7. **HRMS (ESI)** calcd for  $[\text{M}+\text{H}]^+$   $\text{C}_{20}\text{H}_{18}\text{FN}_2\text{O}$ ,  $m/z$ : 321.1398, found: 321.1398.

## Reaction development and optimization

**Supplementary Table 1:** Optimization of reaction conditions in terms of solvent<sup>a</sup>

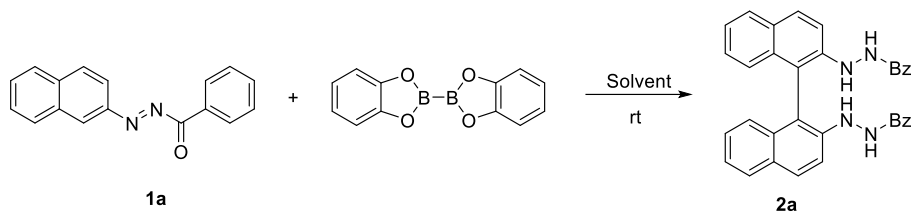

| entry                 | Solvent                     | Yield (%) <sup>b</sup> |
|-----------------------|-----------------------------|------------------------|
| 1                     | 1, 2-dimethoxyethane        | 51                     |
| 2                     | 1, 4 dioxane                | 32                     |
| 3                     | MTBE                        | 44                     |
| 4                     | THF                         | 40                     |
| 5                     | Dichloromethane             | 33                     |
| 6                     | Methanol                    | 0                      |
| 7                     | Toluene                     | 16                     |
| 8                     | DMF                         | 12                     |
| 9                     | DMSO                        | 9                      |
| 10                    | Acetone                     | <i>n.d</i>             |
| 11                    | Ethyl acetate               | 25                     |
| 12                    | Acetonitrile                | 50                     |
| <b>13<sup>c</sup></b> | <b>1, 2-dimethoxyethane</b> | <b>73</b>              |

<sup>a</sup>Unless otherwise indicated, reactions were performed using **1a** azonaphthalene (0.1 mmol), and diboron (0.055 mmol) in 1.0 mL solvent at room temperature for 2 h. <sup>b</sup> Yields were determined by crude <sup>1</sup>H NMR analysis using 1,3,5-trimethoxybenzene as an internal standard. <sup>c</sup> 0.11 mmol of B<sub>2</sub>Cat<sub>2</sub> was used. *n.d* not detected.

**Supplementary Table 2:** Optimization of reaction conditions in terms of additives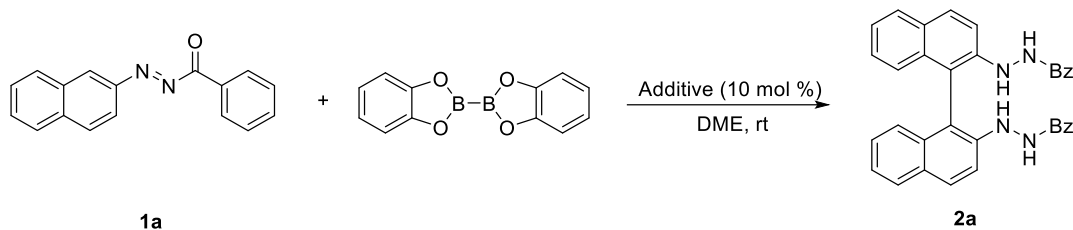

| entry    | Additive                   | Yield (%) <sup>a</sup> |
|----------|----------------------------|------------------------|
| 1        | -                          | 73%                    |
| 2        | $CS_2CO_3$                 | 81%                    |
| 3        | $PPh_3$                    | 67%                    |
| 4        | Triethylamine              | 68%                    |
| 5        | DABCO                      | 63%                    |
| 6        | DBU                        | 76%                    |
| 7        | DMAP                       | 81%                    |
| 8        | 2,6-lutidine               | 63%                    |
| <b>9</b> | <b>2,6-dibromopyridine</b> | <b>89%</b>             |
| 10       | 2,4,6-tribromopyridine     | 72%                    |
| 11       | 4-iodopyridine             | 74%                    |
| 12       | 3-bromopyridine            | 71%                    |
| 13       | 2-cyanopyridine            | 66%                    |
| 14       | 4-methoxy pyridine         | 63%                    |
| 15       | 4-benzyl pyridine          | 58%                    |
| 16       | 4-acetylpyridine           | 67%                    |

<sup>a</sup>Unless otherwise indicated, reactions were performed using **1a** azonaphthalene (0.1 mmol),  $B_2cat_2$  (0.11 mmol) and additive (0.01 mmol) in 1.0 mL DME at room temperature for 2 h. <sup>b</sup> Yields were determined by crude  $^1H$  NMR analysis using 1,3,5-trimethoxybenzene as an internal standard.

## Synthesis of BINAM derivatives via [5,5]-sigmatropic rearrangements

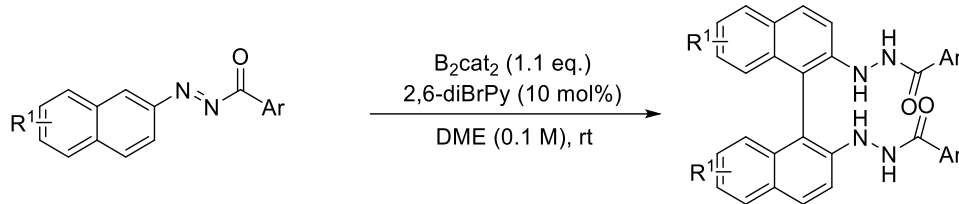

A dry 4 mL vial equipped with a Teflon-coated magnetic stirring bar was charged with azonaphthalene (0.2 mmol), B<sub>2</sub>cat<sub>2</sub> (0.22 mmol) and 2,6-dibromopyridine (0.02 mmol). Anhydrous 1,2-dimethoxyethane (2.0 mL) was added and stirred at room temperature. Upon reaction completion, the mixture was concentrated under reduced pressure to give a residue which was then purified by washing with warm methanol to give the desired product.

### *N',N'''*-([1,1'-binaphthalene]-2,2'-diyl)di(benzohydrazide) (**2a**)

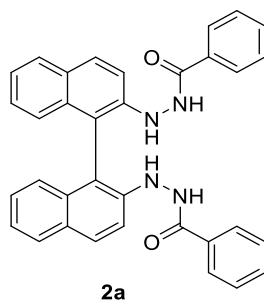

Following the general protocol, compound **2a** was obtained in 89% yield as a white solid.  $R_f$  0.39 (*n*-hexane: ethyl acetate = 2.5:1). <sup>1</sup>H NMR (500 MHz, DMSO-*d*<sub>6</sub>) δ 10.66 (s, 2H), 8.00 – 7.75 (m, 8H), 7.60 – 7.42 (m, 10H), 7.28 (t, *J* = 7.4 Hz, 2H), 7.19 (t, *J* = 7.7 Hz, 2H), 6.80 (d, *J* = 8.5 Hz, 2H). <sup>13</sup>C NMR (126 MHz, DMSO-*d*<sub>6</sub>) δ 168.0, 145.1, 134.0, 133.2, 132.3, 130.1, 129.2, 128.9 (2C), 128.6, 127.7 (2C), 127.0, 124.5, 123.3, 115.5, 112.2. HRMS (ESI) calcd for [M+H]<sup>+</sup> C<sub>34</sub>H<sub>27</sub>N<sub>4</sub>O<sub>2</sub> *m/z* 523.2129, found 523.2130.

### *N',N'''*-([1,1'-binaphthalene]-2,2'-diyl)bis(4-bromobenzohydrazide) (**2b**)

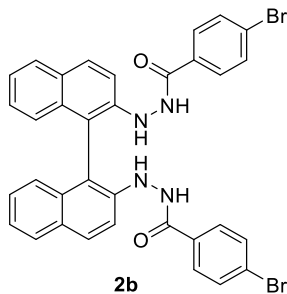

Following the general protocol, compound **2b** was obtained in 76% yield as a white solid.  $R_f$  0.57 (*n*-hexane: ethyl acetate = 3:1).  $^1\text{H NMR}$  (400 MHz,  $\text{DMSO-}d_6$ )  $\delta$  10.71 (d,  $J = 2.0$  Hz, 2H), 7.94 (d,  $J = 9.1$  Hz, 2H), 7.87 (d,  $J = 6.8$  Hz, 2H), 7.78 (d,  $J = 8.6$  Hz, 4H), 7.54 (d,  $J = 8.6$  Hz, 4H), 7.48 (s, 2H), 7.41 (d,  $J = 9.0$  Hz, 2H), 7.31 – 7.24 (m, 2H), 7.21-7.15 (m, 2H), 6.77 (d,  $J = 8.5$  Hz, 2H).  $^{13}\text{C NMR}$  (126 MHz,  $\text{DMSO-}d_6$ )  $\delta$  167.0, 144.8, 137.1, 134.0, 131.9, 130.2, 129.6 (2C), 129.2, 129.1 (2C), 128.6, 127.0, 124.5, 123.4, 115.4, 112.2. **HRMS (ESI)** calcd for  $[\text{M}+\text{H}]^+$   $\text{C}_{34}\text{H}_{25}\text{Br}_2\text{N}_4\text{O}_2$ ,  $m/z$ : 679.0339, found: 679.0338.

***N',N'''*-([1,1'-binaphthalene]-2,2'-diyl)bis(4-chlorobenzohydrazide) (2c)**

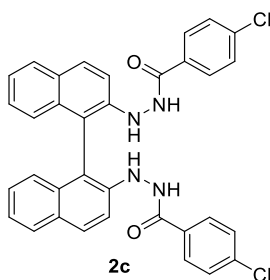

Following the general protocol, compound **2c** was obtained in 84% yield as a white solid.  $R_f$  0.54 (*n*-hexane: ethyl acetate = 3:1).  $^1\text{H NMR}$  (400 MHz,  $\text{DMSO-}d_6$ )  $\delta$  10.71 (d,  $J = 2.0$  Hz, 2H), 7.94 (d,  $J = 9.1$  Hz, 2H), 7.87 (d,  $J = 6.8$  Hz, 2H), 7.78 (d,  $J = 8.6$  Hz, 4H), 7.54 (d,  $J = 8.6$  Hz, 4H), 7.48 (s, 2H), 7.41 (d,  $J = 9.0$  Hz, 2H), 7.31 – 7.24 (m, 2H), 7.21-7.15 (m, 2H), 6.77 (d,  $J = 8.5$  Hz, 2H).  $^{13}\text{C NMR}$  (126 MHz,  $\text{DMSO-}d_6$ )  $\delta$  167.0, 144.8, 137.1, 134.0, 131.9, 130.2, 129.6 (2C), 129.2, 129.1 (2C), 128.6, 127.0, 124.5, 123.4, 115.4, 112.2. **HRMS (ESI)** calcd for  $[\text{M}+\text{H}]^+$   $\text{C}_{34}\text{H}_{25}\text{Cl}_2\text{N}_4\text{O}_2$ ,  $m/z$ : 591.1349, found: 591.1347.

***N',N'''*-([1,1'-binaphthalene]-2,2'-diyl)bis(4-fluorobenzohydrazide) (2d)**

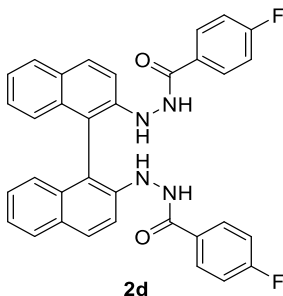

Following the general protocol, compound **2d** was obtained in 79% yield as a white solid.  $R_f$  0.53 (*n*-hexane: ethyl acetate = 2.5:1).  $^1\text{H NMR}$  (400 MHz,  $\text{DMSO-}d_6$ )  $\delta$  10.67 (s, 2H), 7.94 (d,  $J = 9.0$  Hz, 2H), 7.89 – 7.80 (m, 6H), 7.51 (s, 2H), 7.42 (d,  $J = 9.0$  Hz, 2H), 7.34 – 7.23 (m, 6H), 7.20



– 7.15 (m, 2H), 6.77 (d,  $J = 8.5$  Hz, 2H).  $^{13}\text{C}$  NMR (126 MHz, DMSO)  $\delta$  166.9, 164.6 (d,  $J = 249.1$  Hz), 144.9, 134.0, 130.4 (2C) (d,  $J = 9.1$  Hz), 130.1, 129.6 (d,  $J = 3.0$  Hz), 129.2, 128.6, 127.0, 124.5, 123.3, 116.0 (2C) (d,  $J = 22.0$  Hz), 115.4, 112.2. HRMS (ESI) calcd for  $[\text{M}+\text{H}]^+$   $\text{C}_{34}\text{H}_{25}\text{F}_2\text{N}_4\text{O}_2$ ,  $m/z$ : 559.1940, found: 559.1946.

***N',N'''*-([1,1'-binaphthalene]-2,2'-diyl)bis(4-methylbenzohydrazide) (2e)**

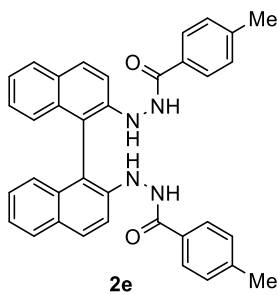

Following the general protocol, compound **2e** was obtained in 89% yield as a white solid.  $R_f$  0.34 (*n*-hexane: ethyl acetate = 3:1).  $^1\text{H}$  NMR (500 MHz, DMSO- $d_6$ )  $\delta$  10.55 (d,  $J = 2.1$  Hz, 2H), 7.94 (d,  $J = 9.1$  Hz, 2H), 7.86 (d,  $J = 8.6$  Hz, 2H), 7.67 (d,  $J = 7.9$  Hz, 4H), 7.55 (s, 2H), 7.40 (d,  $J = 9.1$  Hz, 2H), 7.31 – 7.22 (m, 6H), 7.17 (t,  $J = 7.7$  Hz, 2H), 6.77 (d,  $J = 8.5$  Hz, 2H), 2.34 (s, 6H).  $^{13}\text{C}$  NMR (126 MHz, DMSO- $d_6$ )  $\delta$  167.8, 145.2, 142.2, 134.0, 130.4, 130.0, 129.4 (2C), 129.2, 128.5, 127.7 (2C), 126.9, 124.5, 123.3, 115.4, 112.2, 21.5. HRMS (ESI) calcd for  $[\text{M}+\text{H}]^+$   $\text{C}_{36}\text{H}_{31}\text{N}_4\text{O}_2$ ,  $m/z$ : 551.2442, found: 551.2438.

***N',N'''*-([1,1'-binaphthalene]-2,2'-diyl)bis(3-bromobenzohydrazide) (2f)**

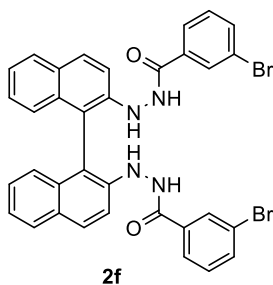

Following the general protocol, compound **2f** was obtained in 69% yield as a white solid.  $R_f$  0.57 (*n*-hexane: ethyl acetate = 2.5:1).  $^1\text{H}$  NMR (400 MHz, DMSO- $d_6$ )  $\delta$  10.72 (s, 2H), 7.95 (d,  $J = 9.0$  Hz, 2H), 7.90 – 7.84 (m, 4H), 7.80 – 7.72 (m, 4H), 7.47 – 7.40 (m, 6H), 7.28 (t,  $J = 6.8$  Hz, 2H), 7.19 (t,  $J = 6.9$  Hz, 2H), 6.77 (d,  $J = 8.4$  Hz, 2H).  $^{13}\text{C}$  NMR (126 MHz, DMSO- $d_6$ )  $\delta$  166.7, 144.7, 135.4, 135.0, 134.0, 131.3, 130.3, 130.2, 129.3, 128.6, 127.0, 126.7, 124.5, 123.4, 122.3, 115.5, 112.2. HRMS (ESI) calcd for  $[\text{M}+\text{H}]^+$   $\text{C}_{34}\text{H}_{25}\text{Br}_2\text{N}_4\text{O}_2$ ,  $m/z$ : 679.0339, found: 679.0337.

***N',N'''*-([1,1'-binaphthalene]-2,2'-diyl)bis(3-methylbenzohydrazide) (2g)**

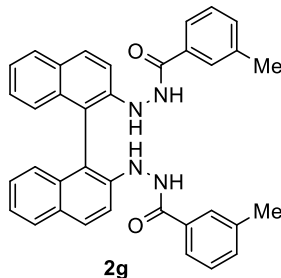

Following the general protocol, compound **2g** was obtained in 83% yield as a white solid.  $R_f$  0.43 (*n*-hexane: ethyl acetate = 3:1). **<sup>1</sup>H NMR (400 MHz, DMSO-*d*<sub>6</sub>)**  $\delta$  10.57 (s, 2H), 7.91 (dd,  $J$  = 30.9, 8.7 Hz, 4H), 7.55 (s, 6H), 7.45 – 7.09 (m, 10H), 6.78 (d,  $J$  = 8.5 Hz, 2H), 2.31 (s, 6H). **<sup>13</sup>C NMR (126 MHz, DMSO-*d*<sub>6</sub>)**  $\delta$  168.2, 145.1, 138.2, 134.0, 133.3, 132.8, 130.1, 129.2, 128.8, 128.6, 128.2, 127.0, 124.7, 124.5, 123.3, 115.5, 112.1, 21.3. **HRMS (ESI)** calcd for  $[M+H]^+$  C<sub>36</sub>H<sub>31</sub>N<sub>4</sub>O<sub>2</sub>  $m/z$ : 551.2442, found: 551.2441.

***N',N'''*-([1,1'-binaphthalene]-2,2'-diyl)bis(2-chlorobenzohydrazide) (2h)**

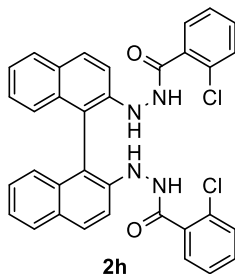

Following the general protocol, compound **2h** was obtained in 72% yield as a white solid.  $R_f$  0.29 (*n*-hexane: ethyl acetate = 2.5:1). **<sup>1</sup>H NMR (400 MHz, DMSO-*d*<sub>6</sub>)**  $\delta$  10.56 (d,  $J$  = 2.1 Hz, 2H), 8.03 (d,  $J$  = 9.1 Hz, 2H), 7.91 (d,  $J$  = 7.5 Hz, 2H), 7.59 (d,  $J$  = 9.0 Hz, 2H), 7.55 (d,  $J$  = 8.0 Hz, 2H), 7.51 – 7.45 (m, 2H), 7.39 (d,  $J$  = 3.8 Hz, 6H), 7.29 (t,  $J$  = 7.1 Hz, 2H), 7.19 (t,  $J$  = 6.9 Hz, 2H), 6.77 (d, 2H). **<sup>13</sup>C NMR (126 MHz, DMSO-*d*<sub>6</sub>)**  $\delta$  167.7, 144.6, 134.9, 133.9, 132.0, 130.9, 130.4, 130.1, 129.7, 129.3, 128.6, 127.6, 127.1, 124.2, 123.5, 115.7, 112.2. **HRMS (ESI)** calcd for  $[M+H]^+$  C<sub>34</sub>H<sub>25</sub>Cl<sub>2</sub>N<sub>4</sub>O<sub>2</sub>,  $m/z$ : 591.1349, found: 591.1348.

***N',N'''*-([1,1'-binaphthalene]-2,2'-diyl)bis(2-fluorobenzohydrazide) (2i)**

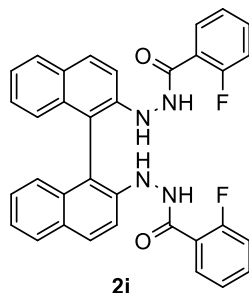

Following the general protocol, compound **2i** was obtained in 87% yield as a white solid.  $R_f$  0.33 (*n*-hexane: ethyl acetate = 2.5:1).  $^1\text{H NMR}$  (400 MHz,  $\text{DMSO-}d_6$ )  $\delta$  10.52 (s, 2H), 8.01 (d,  $J = 9.0$  Hz, 2H), 7.90 (d,  $J = 8.0$  Hz, 2H), 7.57 (t,  $J = 7.3$  Hz, 4H), 7.50 (d,  $J = 8.9$  Hz, 4H), 7.39 – 7.26 (m, 6H), 7.22 – 7.17 (m, 2H), 6.77 (d,  $J = 8.5$  Hz, 2H).  $^{13}\text{C NMR}$  (126 MHz,  $\text{DMSO-}d_6$ )  $\delta$  165.5, 159.7 (d,  $J = 250.2$  Hz), 144.7, 134.0, 133.5 (d,  $J = 8.3$  Hz), 130.4 (d,  $J = 2.8$  Hz), 130.2, 129.3, 128.6, 125.1 (d,  $J = 3.2$  Hz), 125.1, 124.5, 123.4, 122.7 (d,  $J = 15.0$  Hz), 116.8 (d,  $J = 21.7$  Hz), 115.4, 112.2. **HRMS (ESI)** calcd for  $[\text{M}+\text{H}]^+$   $\text{C}_{34}\text{H}_{25}\text{F}_2\text{N}_4\text{O}_2$ ,  $m/z$ : 559.1940, found: 559.1939.

***N',N'''*-([1,1'-binaphthalene]-2,2'-diyl)bis(2-methylbenzohydrazide) (**2j**)**

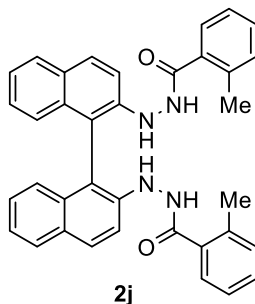

Following the general protocol, compound **2j** was obtained in 65% yield as a white solid.  $R_f$  0.49 (*n*-hexane: ethyl acetate = 3:1).  $^1\text{H NMR}$  (400 MHz,  $\text{DMSO-}d_6$ )  $\delta$  10.39 (d,  $J = 2.2$  Hz, 2H), 8.02 (d,  $J = 9.1$  Hz, 2H), 7.90 (d,  $J = 6.9$  Hz, 2H), 7.56 (s, 2H), 7.49 (d,  $J = 8.9$  Hz, 2H), 7.41 (d,  $J = 7.5$  Hz, 2H), 7.36 (t,  $J = 7.4$  Hz, 2H), 7.31 – 7.22 (m, 6H), 7.18 (t,  $J = 7.3$  Hz, 2H), 6.75 (d,  $J = 8.0$  Hz, 2H), 2.24 (s, 6H).  $^{13}\text{C NMR}$  (126 MHz,  $\text{DMSO-}d_6$ )  $\delta$  170.4, 145.0, 136.5, 134.8, 134.0, 131.1, 130.5, 130.1, 129.2, 128.6, 127.9, 127.0, 126.0, 124.5, 123.4, 115.4, 112.2, 19.8. **HRMS (ESI)** calcd for  $[\text{M}+\text{H}]^+$   $\text{C}_{36}\text{H}_{31}\text{N}_4\text{O}_2$ ,  $m/z$ : 551.2442, found: 551.2444.

***N',N'''*-([1,1'-binaphthalene]-2,2'-diyl)bis(1-naphthohydrazide) (**2k**)**

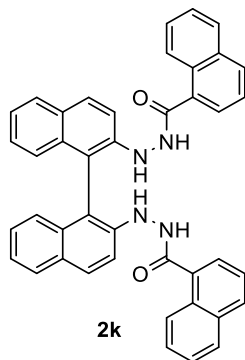

Following the general protocol, compound **2k** was obtained in 73% yield as a white solid.  $R_f$  0.46 (*n*-hexane: ethyl acetate = 3:1).  $^1\text{H NMR}$  (400 MHz,  $\text{DMSO-}d_6$ )  $\delta$  10.80 (s, 2H), 8.16 – 8.06 (m, 6H), 7.96 (d,  $J = 8.1$  Hz, 4H), 7.89 – 7.80 (m, 4H), 7.64 (d,  $J = 8.6$  Hz, 4H), 7.46 (t,  $J = 7.5$  Hz, 2H), 7.33 (t,  $J = 7.5$  Hz, 2H), 7.23 (t,  $J = 7.7$  Hz, 2H), 7.05 (t,  $J = 7.7$  Hz, 2H), 6.82 (d,  $J = 8.3$  Hz, 2H).  $^{13}\text{C NMR}$  (126 MHz,  $\text{DMSO-}d_6$ )  $\delta$  170.2, 145.0, 134.1, 133.6, 132.3, 131.2, 130.9, 130.4, 130.3, 129.3, 128.7, 127.1 (2C), 126.8, 126.5, 125.7, 125.4, 124.5, 123.5, 115.3, 112.3. **HRMS (ESI)** calcd for  $[\text{M}+\text{H}]^+$   $\text{C}_{42}\text{H}_{31}\text{N}_4\text{O}_2$   $m/z$ : 623.2440, found: 623.2442.

***N',N'''*-([1,1'-binaphthalene]-2,2'-diyl)bis(2-naphthohydrazide) (**2l**)**

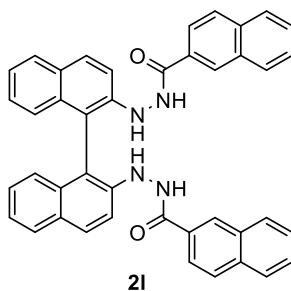

Following the general protocol, compound **2l** was obtained in 82% yield as a white solid.  $R_f$  0.40 (*n*-hexane: ethyl acetate = 3:1).  $^1\text{H NMR}$  (500 MHz,  $\text{DMSO-}d_6$ )  $\delta$  10.83 (s, 2H), 8.43 (d,  $J = 4.8$  Hz, 2H), 7.96 (dd,  $J = 10.8, 4.1$  Hz, 8H), 7.89 (d,  $J = 8.1$  Hz, 2H), 7.81 (d,  $J = 6.7$  Hz, 2H), 7.67 (d,  $J = 6.4$  Hz, 2H), 7.64 – 7.50 (m, 6H), 7.29 (t,  $J = 7.5$  Hz, 2H), 7.24 – 7.18 (m, 2H), 6.83 (t,  $J = 6.7$  Hz, 2H).  $^{13}\text{C NMR}$  (126 MHz,  $\text{DMSO-}d_6$ )  $\delta$  168.2, 145.1, 134.8, 134.1, 132.5, 130.6, 130.1, 129.3 (2C), 128.6 (2C), 128.3, 128.2, 128.1, 127.4, 127.0, 124.6, 124.3, 123.3, 115.6, 112.3. **HRMS (ESI)** calcd for  $[\text{M}+\text{H}]^+$   $\text{C}_{42}\text{H}_{31}\text{N}_4\text{O}_2$ ,  $m/z$ : 623.2442, found: 623.2445.

***N',N'''*-([1,1'-binaphthalene]-2,2'-diyl)bis(2,6-difluorobenzohydrazide) (**2m**)**

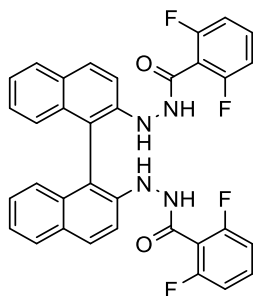

**2m**

Following the general protocol, compound **2m** was obtained in 89% yield as a white solid.  $R_f$  0.37 (*n*-hexane: ethyl acetate = 3:1).  $^1\text{H NMR}$  (500 MHz,  $\text{DMSO-}d_6$ )  $\delta$  10.76 (d,  $J = 2.3$  Hz, 2H), 8.04 (d,  $J = 9.1$  Hz, 2H), 7.91 (d,  $J = 8.0$  Hz, 2H), 7.61 – 7.53 (m, 2H), 7.49 (d,  $J = 9.0$  Hz, 2H), 7.29 (t,  $J = 6.6$  Hz, 4H), 7.25 – 7.16 (m, 6H), 6.77 (d,  $J = 8.5$  Hz, 2H).  $^{13}\text{C NMR}$  (126 MHz,  $\text{DMSO-}d_6$ )  $\delta$  161.1, 159.8 (d,  $J = 247.4$  Hz), 159.8 (d,  $J = 250.8$  Hz), 144.4, 133.9, 133.0, 130.2, 129.3, 128.6, 127.1, 124.5, 123.6, 115.3, 113.5 (t,  $J = 22.2$  Hz), 112.6 (d,  $J = 4.3$  Hz), 112.40 (2C). **HRMS (ESI)** calcd for  $[\text{M}+\text{H}]^+$   $\text{C}_{34}\text{H}_{23}\text{F}_4\text{N}_4\text{O}_2$ ,  $m/z$  595.1752, found: 595.1758.

***N',N''*-(6,6'-dimethoxy-[1,1'-binaphthalene]-2,2'-diyl)bis(2-fluorobenzohydrazide) (2n)**

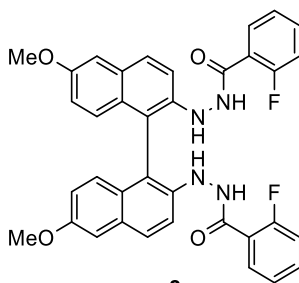

**2n**

Following the general protocol, compound **2n** was obtained in 87% yield as a white solid.  $R_f$  0.21 (*n*-hexane: ethyl acetate = 2.5:1).  $^1\text{H NMR}$  (400 MHz,  $\text{DMSO-}d_6$ )  $\delta$  10.46 (s, 2H), 7.91 (s, 2H), 7.44 (d,  $J = 95.7$  Hz, 14H), 6.89 (s, 2H), 6.68 (s, 2H), 3.83 (s, 6H).  $^{13}\text{C NMR}$  (126 MHz,  $\text{DMSO-}d_6$ )  $\delta$  165.4, 159.7 (d,  $J = 250.1$  Hz), 155.8, 142.8, 133.4 (d,  $J = 8.4$  Hz), 130.4 (2C), 130.2, 129.2, 129.1 (d,  $J = 24.1$  Hz), 125.0 (d,  $J = 3.2$  Hz), 122.8 (d,  $J = 15.1$  Hz), 119.3, 116.7 (d,  $J = 21.9$  Hz), 115.9, 112.9, 107.2, 55.6. **HRMS (ESI)** calcd for  $[\text{M}+\text{H}]^+$   $\text{C}_{36}\text{H}_{29}\text{F}_2\text{N}_4\text{O}_4$   $m/z$ : 619.2151, found: 619.2154.

***N',N'''*-(6,6'-dimethyl-[1,1'-binaphthalene]-2,2'-diyl)bis(2-fluorobenzohydrazide) (2o)**

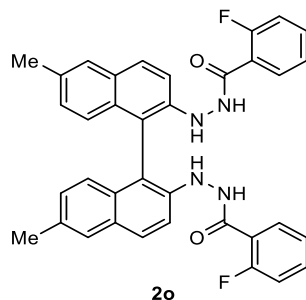

Following the general protocol, compound **2o** was obtained in 83% yield as a white solid.  $R_f$  0.34 (*n*-hexane: ethyl acetate = 3:1).  $^1\text{H NMR}$  (400 MHz,  $\text{DMSO-}d_6$ )  $\delta$  10.48 (s, 2H), 7.90 (d,  $J = 9.0$  Hz, 2H), 7.65 (s, 2H), 7.55 (t,  $J = 6.8$  Hz, 4H), 7.47 – 7.40 (m, 4H), 7.36 – 7.25 (m, 4H), 7.03 (dd,  $J = 8.8, 1.8$  Hz, 2H), 6.67 (d,  $J = 8.7$  Hz, 2H), 2.38 (s, 6H).  $^{13}\text{C NMR}$  (126 MHz,  $\text{DMSO-}d_6$ )  $\delta$  165.4, 159.7 (d,  $J = 250.1$  Hz), 143.9, 133.5 (d,  $J = 8.3$  Hz), 132.4, 132.2, 130.4, 129.4 (2C), 129.1, 127.5, 125.0 (d,  $J = 2.6$  Hz), 124.6, 122.8 (d,  $J = 15.0$  Hz), 116.8 (d,  $J = 21.7$  Hz), 115.4, 112.42, 21.3. **HRMS (ESI)** calcd for  $[\text{M}+\text{H}]^+$   $\text{C}_{36}\text{H}_{29}\text{F}_2\text{N}_4\text{O}_2$ ,  $m/z$ : 587.2253, found: 587.2256.

***N',N'''*-(6,6'-diisopropyl-[1,1'-binaphthalene]-2,2'-diyl)bis(2-fluorobenzohydrazide) (2p)**

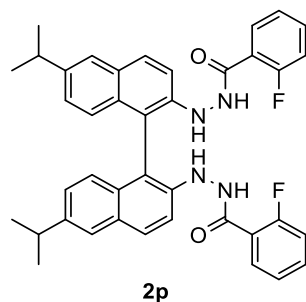

Following the general protocol, compound **2p** was obtained in 85% yield as a white solid.  $R_f$  0.37 (*n*-hexane: ethyl acetate = 3:1).  $^1\text{H NMR}$  (500 MHz,  $\text{DMSO-}d_6$ )  $\delta$  10.46 (s, 2H), 7.93 (d,  $J = 9.1$  Hz, 2H), 7.69 (d,  $J = 1.9$  Hz, 2H), 7.61 – 7.52 (m, 4H), 7.44 (d,  $J = 9.0$  Hz, 2H), 7.40 – 7.38 (m, 2H), 7.37 – 7.23 (m, 4H), 7.13 (dd,  $J = 8.8, 1.9$  Hz, 2H), 6.72 (d,  $J = 8.7$  Hz, 2H), 2.97 (p,  $J = 6.8$  Hz, 2H), 1.25 (dd,  $J = 6.9, 3.4$  Hz, 12H).  $^{13}\text{C NMR}$  (126 MHz,  $\text{DMSO-}d_6$ )  $\delta$  165.4, 159.7 (d,  $J = 249.9$  Hz), 144.0, 143.3, 133.4 (d,  $J = 8.4$  Hz), 132.6, 130.3 (d,  $J = 2.6$  Hz), 129.8, 129.4, 126.8, 125.1, 125.0, 124.7, 122.8 (d,  $J = 15.0$  Hz), 116.7 (d,  $J = 21.8$  Hz), 115.3, 112.4, 33.6, 24.4, 24.2. **HRMS (ESI)** calcd for  $[\text{M}+\text{H}]^+$   $\text{C}_{40}\text{H}_{37}\text{F}_2\text{N}_4\text{O}_2$ ,  $m/z$ : 643.2879, found: 643.2880.

***N',N'''*-(6,6'-dicyclohexyl-[1,1'-binaphthalene]-2,2'-diyl)bis(2-fluorobenzohydrazide) (2q)**

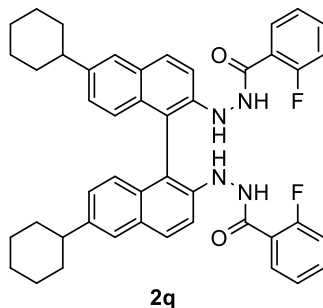

Following the general protocol, compound **2q** was obtained in 87% yield as a white solid.  $R_f$  0.40 (*n*-hexane: ethyl acetate = 3:1).  $^1\text{H NMR}$  (400 MHz,  $\text{CDCl}_3$ )  $\delta$  8.65 (d,  $J = 10.8$  Hz, 2H), 7.77 (d,  $J = 8.8$  Hz, 4H), 7.53 (s, 2H), 7.36 (d,  $J = 9.0$  Hz, 4H), 7.12 – 6.96 (m, 8H), 2.58 – 2.46 (m, 2H), 1.84 (d,  $J = 11.4$  Hz, 4H), 1.76 (d,  $J = 8.6$  Hz, 4H), 1.66 (d,  $J = 12.2$  Hz, 2H), 1.44 – 1.26 (m, 8H), 1.24 – 1.15 (m, 2H).  $^{13}\text{C NMR}$  (126 MHz,  $\text{CDCl}_3$ )  $\delta$  164.4 (d,  $J = 3.7$  Hz), 160.6 (d,  $J = 248.7$  Hz), 143.4, 143.0, 133.7 (d,  $J = 9.0$  Hz), 132.5, 131.9 (d,  $J = 2.6$  Hz), 123.0, 129.8, 127.5, 124.8 (2C), 124.7, 119.8 (d,  $J = 13.3$  Hz), 116.1 (d,  $J = 24.0$  Hz), 115.5, 113.9, 44.3, 34.5, 34.3, 27.0 (2C), 26.2. **HRMS (ESI)** calcd for  $[\text{M}+\text{H}]^+$   $\text{C}_{46}\text{H}_{45}\text{F}_2\text{N}_4\text{O}_2$ ,  $m/z$ : 723.3505, found: 723.3507.

***N',N'''*-(6,6'-diphenyl-[1,1'-binaphthalene]-2,2'-diyl)bis(2-fluorobenzohydrazide) (2r)**

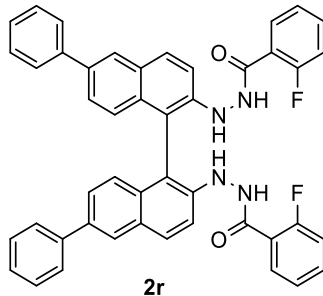

Following the general protocol, compound **2r** was obtained in 75% yield as a white solid.  $R_f$  0.23 (*n*-hexane: ethyl acetate = 3:1).  $^1\text{H NMR}$  (500 MHz,  $\text{DMSO-}d_6$ )  $\delta$  10.56 (s, 2H), 8.22 (s, 2H), 8.12 (d,  $J = 9.1$  Hz, 2H), 7.74 (d,  $J = 7.7$  Hz, 4H), 7.61 – 7.51 (m, 10H), 7.47 (t,  $J = 7.6$  Hz, 4H), 7.39 – 7.28 (m, 6H), 6.92 (d,  $J = 8.8$  Hz, 2H).  $^{13}\text{C NMR}$  (126 MHz,  $\text{DMSO-}d_6$ )  $\delta$  165.5, 159.8 (d,  $J = 250.3$  Hz), 145.0, 140.5, 135.1, 133.5 (d,  $J = 8.6$  Hz), 133.3, 130.8, 130.4 (2C), 129.6, 129.4 (2C), 127.6, 127.1 (2C), 126.2 (d,  $J = 12.5$  Hz), 125.3, 125.1 (d,  $J = 3.3$  Hz), 122.7 (d,  $J = 14.9$  Hz), 116.8 (d,  $J = 21.8$  Hz), 115.9, 112.0. **HRMS (ESI)** calcd for  $[\text{M}+\text{H}]^+$   $\text{C}_{46}\text{H}_{33}\text{F}_2\text{N}_4\text{O}_2$ ,  $m/z$ : 711.2566, found: 711.2576.

***N',N'''*-(6,6'-dibromo-[1,1'-binaphthalene]-2,2'-diyl)bis(2-fluorobenzohydrazide) (2s)**

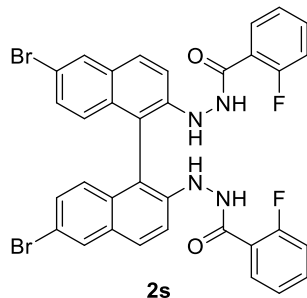

Following the general protocol, compound **2s** was obtained in 92% yield as a white solid.  $R_f$  0.29 (*n*-hexane: ethyl acetate = 3:1).  $^1\text{H NMR}$  (500 MHz,  $\text{DMSO-}d_6$ )  $\delta$  10.55 (s, 2H), 8.16 (d,  $J = 2.2$  Hz, 2H), 8.01 (d,  $J = 9.1$  Hz, 2H), 7.62 – 7.53 (m, 4H), 7.51 (d,  $J = 9.1$  Hz, 2H), 7.46 (s, 2H), 7.36 – 7.27 (m, 6H), 6.68 (d,  $J = 9.0$  Hz, 2H).  $^{13}\text{C NMR}$  (126 MHz,  $\text{DMSO-}d_6$ )  $\delta$  165.5, 159.7 (d,  $J = 250.3$  Hz), 145.3, 133.6 (d,  $J = 8.3$  Hz), 132.5, 130.5, 130.4 (2C), 130.1, 129.7, 126.6, 125.1 (d,  $J = 3.2$  Hz), 122.5 (d,  $J = 14.9$  Hz), 116.8 (d,  $J = 21.6$  Hz), 116.6, 116.3, 111.6. **HRMS (ESI)** calcd for  $[\text{M}+\text{H}]^+$   $\text{C}_{34}\text{H}_{23}\text{Br}_2\text{F}_2\text{N}_4\text{O}_2$ ,  $m/z$ : 715.0150, found: 715.0147.

***N',N'''*-(6,6'-divinyl-[1,1'-binaphthalene]-2,2'-diyl)bis(2-fluorobenzohydrazide) (**2t**)**

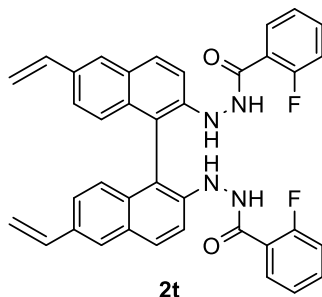

Following the general protocol, compound **2t** was obtained in 58% yield.  $R_f$  0.39 (*n*-hexane: ethyl acetate = 2.5:1).  $^1\text{H NMR}$  (500 MHz,  $\text{CDCl}_3$ )  $\delta$  8.54 (d,  $J = 12.9$  Hz, 2H), 8.16 (td,  $J = 7.7, 1.8$  Hz, 2H), 7.81 – 7.73 (m, 4H), 7.72 – 7.60 (m, 4H), 7.45 – 7.37 (m, 2H), 7.38 – 7.29 (m, 4H), 7.28 – 7.21 (m, 4H), 7.17 (dd,  $J = 8.8, 2.3$  Hz, 2H), 5.82 (d,  $J = 17.6$  Hz, 2H), 5.28 (d,  $J = 11.4$  Hz, 2H).  $^{13}\text{C NMR}$  (126 MHz,  $\text{CDCl}_3$ )  $\delta$  165.5, 160.8 (d,  $J = 245.8$  Hz), 145.7, 137.0, 134.2 (d,  $J = 9.3$  Hz), 132.3, 129.5, 129.4, 127.7, 127.0, 126.6, 126.5, 126.3, 125.2 (d,  $J = 2.5$  Hz), 123.9, 116.4 (d,  $J = 20.0$  Hz), 116.2 (d,  $J = 14.3$  Hz), 113.0, 108.1. **HRMS (ESI)** calcd for  $[\text{M}+\text{H}]^+$   $\text{C}_{38}\text{H}_{29}\text{F}_2\text{O}_2$ ,  $m/z$ : 611.2253, found: 611.2254.

***N',N'''*-(6,6'-diethynyl-[1,1'-binaphthalene]-2,2'-diyl)bis(2-fluorobenzohydrazide) (**2u**)**



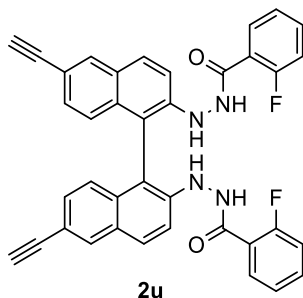

Following the general protocol, compound **2u** was obtained in 83% yield as a white solid.  $R_f$  0.24 (*n*-hexane: ethyl acetate = 3:1).  $^1\text{H NMR}$  (400 MHz,  $\text{DMSO-}d_6$ )  $\delta$  10.57 (s, 2H), 8.10 (s, 2H), 8.04 (d,  $J = 9.1$  Hz, 2H), 7.60 – 7.49 (m, 8H), 7.39 – 7.20 (m, 6H), 6.74 (d,  $J = 8.8$  Hz, 2H), 4.17 (s, 2H).  $^{13}\text{C NMR}$  (126 MHz,  $\text{DMSO-}d_6$ )  $\delta$  165.4, 159.7 (d,  $J = 250.4$  Hz), 145.9, 133.6 (2C), 132.6, 130.4 (2C), 129.6, 128.7, 125.1 (d,  $J = 2.7$  Hz), 124.8, 122.5 (d,  $J = 14.9$  Hz), 116.8 (d,  $J = 21.7$  Hz), 116.37, 116.19, 111.5, 84.4, 80.8. **HRMS (ESI)** calcd for  $[\text{M}+\text{H}]^+$   $\text{C}_{38}\text{H}_{25}\text{F}_2\text{N}_4\text{O}_2$ ,  $m/z$ : 607.1940 found: 607.1946.

***N',N'''*-(6,6'-difluoro-[1,1'-binaphthalene]-2,2'-diyl)bis(2-fluorobenzohydrazide) (2v)**

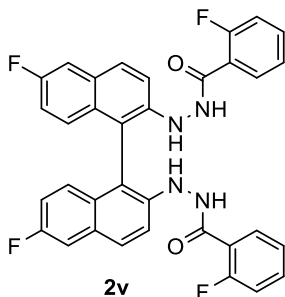

Following the general protocol, compound **2v** was obtained in 92% yield as a white solid.  $R_f$  0.27 (*n*-hexane: ethyl acetate = 3:1).  $^1\text{H NMR}$  (500 MHz,  $\text{DMSO-}d_6$ )  $\delta$  10.53 (s, 2H), 8.00 (s, 2H), 7.70 (dd,  $J = 9.9, 2.8$  Hz, 2H), 7.54 (s, 6H), 7.45 (d,  $J = 2.1$  Hz, 2H), 7.36 – 7.27 (m, 4H), 7.14 (d,  $J = 2.8$  Hz, 2H), 6.77 (d,  $J = 3.7$  Hz, 2H).  $^{13}\text{C NMR}$  (126 MHz,  $\text{DMSO-}d_6$ )  $\delta$  165.4, 159.7 (d,  $J = 250.2$  Hz), 158.9 (d,  $J = 240.7$  Hz), 144.4, 133.5 (d,  $J = 8.4$  Hz), 130.9, 130.4, 129.7 (2C), 127.0 (d,  $J = 8.6$  Hz), 125.1 (d,  $J = 2.7$  Hz), 122.6 (d,  $J = 14.9$  Hz), 117.1 (d,  $J = 24.9$  Hz), 116.8 (d,  $J = 9.4$  Hz), 116.7, 112.2, 111.7 (d,  $J = 20.4$  Hz). **HRMS (ESI)** calcd for  $[\text{M}+\text{H}]^+$   $\text{C}_{34}\text{H}_{23}\text{F}_4\text{N}_4\text{O}_2$ ,  $m/z$ : 595.1752, found: 595.1753.

**Dimethyl 2,2'-bis(2-(2-fluorobenzoyl)hydrazineyl)-[1,1'-binaphthalene]-6,6'-dicarboxylate (2w)**

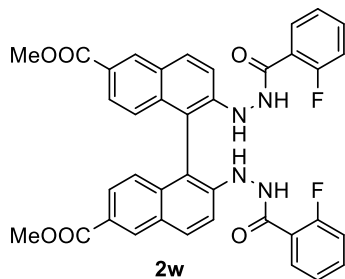

Following the general protocol, compound **2w** was obtained in 88% yield as a white solid.  $R_f$  0.13 (*n*-hexane: ethyl acetate = 2.5:1).  $^1\text{H NMR}$  (500 MHz,  $\text{DMSO-}d_6$ )  $\delta$  10.61 (s, 2H), 8.62 (s, 2H), 8.25 (d,  $J = 9.1$  Hz, 2H), 7.70 (dd,  $J = 9.0, 1.9$  Hz, 2H), 7.61 – 7.54 (m, 8H), 7.39 – 7.25 (m, 4H), 6.86 (d,  $J = 8.8$  Hz, 2H), 3.87 (s, 6H).  $^{13}\text{C NMR}$  (126 MHz,  $\text{DMSO-}d_6$ )  $\delta$  166.9, 165.4, 159.8 (d,  $J = 250.4$  Hz), 147.2, 136.3, 133.7 (d,  $J = 7.9$  Hz), 132.2, 131.6, 130.4, 128.2, 126.3, 125.1 (d,  $J = 2.7$  Hz), 124.6, 124.3, 122.4 (d,  $J = 14.7$  Hz), 116.8 (d,  $J = 21.8$  Hz), 116.3, 111.3, 52.5. **HRMS (ESI)** calcd for  $[\text{M}+\text{H}]^+$   $\text{C}_{38}\text{H}_{29}\text{F}_2\text{N}_4\text{O}_6$ ,  $m/z$ : 675.2050, found: 675.2051.

***N',N'''*-(7,7'-dimethyl-[1,1'-binaphthalene]-2,2'-diyl)bis(2-fluorobenzohydrazide) (**2x**)**

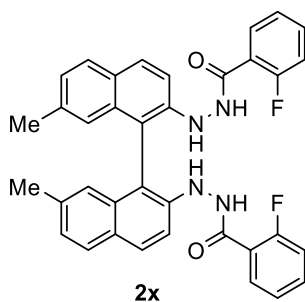

Following the general protocol, compound **2x** was obtained in 83% yield as a white solid.  $R_f$  0.28 (*n*-hexane: ethyl acetate = 3:1).  $^1\text{H NMR}$  (400 MHz,  $\text{DMSO-}d_6$ )  $\delta$  7.94 (d,  $J = 9.0$  Hz, 2H), 7.79 (d,  $J = 8.3$  Hz, 2H), 7.63 – 7.50 (m, 4H), 7.39 (d,  $J = 8.9$  Hz, 2H), 7.37 – 7.23 (m, 6H), 7.13 (dd,  $J = 8.3, 1.7$  Hz, 2H), 6.57 (s, 2H), 2.15 (s, 6H).  $^{13}\text{C NMR}$  (126 MHz,  $\text{DMSO-}d_6$ )  $\delta$  165.3, 159.7 (d,  $J = 250.0$  Hz), 144.7, 136.1, 134.1, 133.5 (d,  $J = 8.4$  Hz), 130.4, 129.9, 128.5, 127.5, 125.7, 125.1 (d,  $J = 3.5$  Hz), 123.3, 122.7 (d,  $J = 14.9$  Hz), 116.8 (d,  $J = 21.7$  Hz), 114.4, 111.9, 22.2. **HRMS (ESI)** calcd for  $[\text{M}+\text{H}]^+$   $\text{C}_{36}\text{H}_{29}\text{F}_2\text{N}_4\text{O}_2$ ,  $m/z$ : 587.2253, found: 587.2249.

***N',N'''*-(7,7'-diphenyl-[1,1'-binaphthalene]-2,2'-diyl)bis(2-fluorobenzohydrazide) (**2y**)**

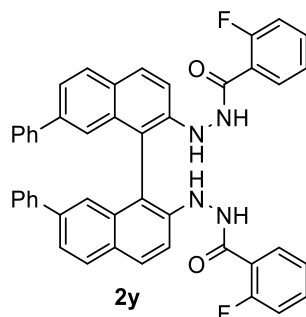

Following the general protocol, compound **2y** was obtained in 84% yield as a white solid.  $R_f$  0.25 (*n*-hexane: ethyl acetate = 3:1).  $^1\text{H NMR}$  (500 MHz,  $\text{DMSO-}d_6$ )  $\delta$  10.55 (s, 2H), 8.03 (dd,  $J = 31.9, 8.7$  Hz, 4H), 7.63 – 7.50 (m, 8H), 7.46 (s, 2H), 7.37 – 7.31 (m, 4H), 7.31 – 7.26 (m, 8H), 7.25 – 7.20 (m, 2H), 7.07 (s, 2H).  $^{13}\text{C NMR}$  (126 MHz,  $\text{DMSO-}d_6$ )  $\delta$  165.4, 159.8 (d,  $J = 250.1$  Hz), 145.3, 141.1, 138.8, 134.1, 133.5 (d,  $J = 8.2$  Hz), 130.4, 130.1, 129.4 (3C), 128.5, 127.8, 127.1 (2C), 125.1 (d,  $J = 3.4$  Hz), 122.9, 122.7 (d,  $J = 14.8$  Hz), 122.2, 116.8 (d,  $J = 21.8$  Hz), 115.6, 112.2. **HRMS (ESI)** calcd for  $[\text{M}+\text{H}]^+$   $\text{C}_{46}\text{H}_{33}\text{F}_2\text{N}_4\text{O}_6$ ,  $m/z$ : 711.2566, found: 711.2567.

***N',N'''*-(7,7'-dibromo-[1,1'-binaphthalene]-2,2'-diyl)bis(2-fluorobenzohydrazide) (**2z**)**

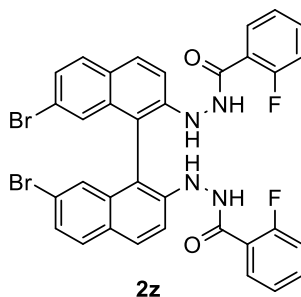

Following the general protocol, compound **2z** was obtained in 93% yield as a white solid.  $R_f$  0.24 (*n*-hexane: ethyl acetate = 3:1).  $^1\text{H NMR}$  (500 MHz,  $\text{DMSO-}d_6$ )  $\delta$  10.54 (s, 2H), 8.06 (d,  $J = 9.1$  Hz, 2H), 7.89 (d,  $J = 8.6$  Hz, 2H), 7.61 – 7.47 (m, 6H), 7.45 – 7.38 (m, 4H), 7.37 – 7.26 (m, 4H), 6.88 (s, 2H).  $^{13}\text{C NMR}$  (126 MHz,  $\text{DMSO-}d_6$ )  $\delta$  165.3, 159.8 (d,  $J = 250.3$  Hz), 146.0, 135.1, 133.6 (d,  $J = 8.5$  Hz), 131.2, 130.8, 130.4 (d,  $J = 2.7$  Hz), 127.7, 126.5, 125.7, 125.1 (d,  $J = 3.3$  Hz), 122.4 (d,  $J = 14.8$  Hz), 121.1, 116.8 (d,  $J = 21.7$  Hz), 116.0, 110.2. **HRMS (ESI)** calcd for  $[\text{M}+\text{H}]^+$   $\text{C}_{34}\text{H}_{23}\text{Br}_2\text{F}_2\text{N}_4\text{O}_2$ ,  $m/z$ : 715.0150, found: 715.0151.

***N',N'''*-(8,8'-dimethyl-[1,1'-binaphthalene]-2,2'-diyl)bis(2-fluorobenzohydrazide) (**2aa**)**

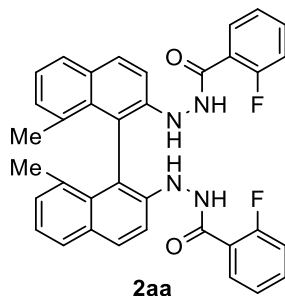

Following the general protocol, compound **2aa** was obtained in 82% yield as a white solid.  $R_f$  0.35 (*n*-hexane: ethyl acetate = 3:1).  $^1\text{H NMR}$  (400 MHz,  $\text{CDCl}_3$ )  $\delta$  8.47 (d,  $J = 11.3$  Hz, 2H), 8.04 – 7.95 (m, 2H), 7.64 (d,  $J = 8.7$  Hz, 2H), 7.51 (d,  $J = 7.9$  Hz, 2H), 7.49 – 7.41 (m, 2H), 7.28 (d,  $J = 2.3$  Hz, 2H), 7.21 (t,  $J = 7.4$  Hz, 2H), 7.17 – 7.08 (m, 6H), 7.08 – 7.03 (m, 2H), 2.48 (s, 6H).  $^{13}\text{C NMR}$  (101 MHz,  $\text{CDCl}_3$ )  $\delta$  164.0 (d,  $J = 3.7$  Hz), 160.7 (d,  $J = 248.2$  Hz), 145.4, 134.1 (d,  $J = 9.3$  Hz), 133.5, 132.9, 132.1 (d,  $J = 2.5$  Hz), 130.0, 129.6, 127.2, 126.2, 125.2 (d,  $J = 3.1$  Hz), 123.3, 116.2 (d,  $J = 24.4$  Hz), 115.6, 115.3, 105.0, 19.4. **HRMS (ESI)** calcd for  $[\text{M}+\text{H}]^+$   $\text{C}_{36}\text{H}_{29}\text{F}_2\text{N}_4\text{O}_2$ ,  $m/z$  587.2253 found: 587.2252.

***N',N'''*-(4,4'-dibromo-[1,1'-binaphthalene]-2,2'-diyl)bis(2-fluorobenzohydrazide) (2ab)**

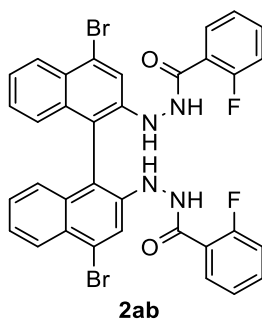

Following the general protocol, compound **2ab** was obtained in 72% yield as a white solid.  $R_f$  0.43 (*n*-hexane: ethyl acetate = 3:1).  $^1\text{H NMR}$  (500 MHz,  $\text{DMSO-}d_6$ )  $\delta$  10.55 (s, 2H), 8.11 (d,  $J = 8.4$  Hz, 2H), 7.78 (s, 2H), 7.61 – 7.56 (m, 2H), 7.51 (t,  $J = 6.5$  Hz, 2H), 7.47 – 7.42 (m, 4H), 7.39 – 7.33 (m, 2H), 7.31 (t,  $J = 7.5$  Hz, 4H), 6.86 (d,  $J = 8.5$  Hz, 2H).  $^{13}\text{C NMR}$  (126 MHz,  $\text{DMSO}$ )  $\delta$  165.4, 159.7 (d,  $J = 249.7$  Hz), 145.2, 134.9, 133.7 (d,  $J = 8.7$  Hz), 130.3, 130.2, 128.3, 127.3, 125.2 (2C), 125.1, 124.5, 122.4 (d,  $J = 15.1$  Hz), 119.3, 116.8 (d,  $J = 21.7$  Hz), 111.7. **HRMS (ESI)** calcd for  $[\text{M}+\text{H}]^+$   $\text{C}_{34}\text{H}_{23}\text{Br}_2\text{F}_2\text{N}_4\text{O}_2$ ,  $m/z$ : 715.015, found: 715.0145.

***N',N'''*-([1,1'-bianthracene]-2,2'-diyl)bis(2-fluorobenzohydrazide) (2ad)**

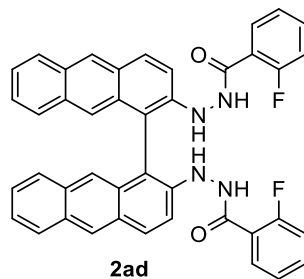

Following the general protocol, compound **2ad** was obtained in 58% yield as a white solid.  $R_f$  0.44 (*n*-hexane: ethyl acetate = 3:1).  $^1\text{H NMR}$  (400 MHz,  $\text{CDCl}_3$ )  $\delta$  8.57 (d,  $J = 12.4$  Hz, 2H), 8.31 (s, 2H), 8.19 (s, 2H), 8.14 (dd,  $J = 7.7, 1.9$  Hz, 2H), 7.97 – 7.86 (m, 6H), 7.43 – 7.30 (m, 8H), 7.28 – 7.24 (m, 4H), 7.16 (dd,  $J = 9.0, 2.2$  Hz, 2H).  $^{13}\text{C NMR}$  (126 MHz,  $\text{CDCl}_3$ )  $\delta$  163.7, 160.8 (d,  $J = 248.0$  Hz), 144.7, 134.2 (d,  $J = 9.3$  Hz), 132.3 (d,  $J = 2.3$  Hz), 130.8, 130.4, 129.9, 128.8, 128.3, 127.7, 126.3, 125.5, 125.2 (d,  $J = 3.2$  Hz), 124.4, 124.2, 122.9, 117.7, 116.6, 116.3 (d,  $J = 24.5$  Hz), 106.0. **HRMS (ESI)** calcd for  $[\text{M}+\text{H}]^+$   $\text{C}_{42}\text{H}_{29}\text{F}_2\text{N}_4\text{O}_2$ ,  $m/z$ : 659.2253, found: 659.2254.

### Gram scale synthesis of BINAM derivatives

Azonaphthalene (15 g, 57.7 mmol),  $\text{B}_2\text{cat}_2$  (15 g, 63.5 mmol) and 2,6-dibromopyridine (1.4 g, 5.77 mmol) were added to a 500 mL dry round-bottomed flask equipped with a Teflon-coated magnetic stirring bar. Anhydrous 1,2-dimethoxyethane (280 mL) was added and the reaction was stirred at room temperature for 1 hour. The reaction mixture was then concentrated to dryness and purified by washing with warm methanol to give 13.7 g of **2a** (91% yield).

### Cleavage of *N-N* Bond — Accessing free BINAM

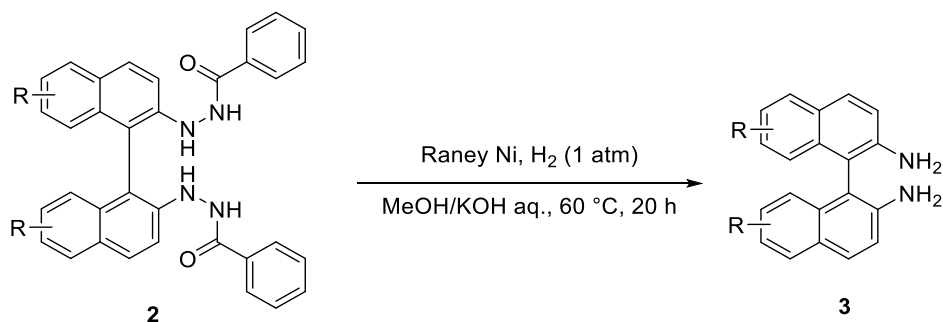

A Schlenk tube containing approximately 100 mg of Raney nickel and equipped with a Teflon-coated magnetic stir bar was washed with methanol (5 x 2 mL). Methanol (1 mL), BINAM derivative **2** (0.1 mmol, 1 equiv.), and aqueous potassium hydroxide solution (0.5 mmol, 0.2 M) were added. The reaction mixture was degassed, backfilled with hydrogen gas ( $\text{H}_2$  balloon), and

stirred at 60 °C until complete consumption of the starting material. The reaction was allowed to cool to room temperature and filtered carefully whilst washing with ethyl acetate, and the filtrate was then concentrated to dryness. The resulting residue was dissolved in dichloromethane, washed with brine, and dried over sodium sulfate. The organic phase was filtered off, evaporated to dryness, and purified by flash chromatography using (n-hexane: ethyl acetate = 6:1 to 4:1) to obtain **3** as a white solid.

### [1,1'-binaphthalene]-2,2'-diamine (**3a**)

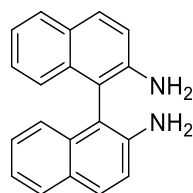

**3a**

Following the general protocol, compound **3a** was obtained in 90% yield;  $R_f$  0.41 (n-hexane: ethyl acetate = 3:1).  $^1\text{H NMR}$  (400 MHz,  $\text{CDCl}_3$ )  $\delta$  7.74 – 7.67 (m, 4H), 7.17 – 7.08 (m, 4H), 7.05 (d,  $J = 8.7$  Hz, 2H), 6.99 (d,  $J = 8.5$  Hz, 2H).  $^{13}\text{C NMR}$  (126 MHz,  $\text{CDCl}_3$ )  $\delta$  142.5, 133.7, 129.6, 128.6, 128.2, 126.9, 124.0, 122.5, 118.4, 112.8. **HRMS (ESI)** calcd for  $[\text{M}+\text{H}]^+$   $\text{C}_{20}\text{H}_{17}\text{N}_2$ ,  $m/z$ : 285.1386, found: 285.1384.

### 6,6'-dimethoxy-[1,1'-binaphthalene]-2,2'-diamine (**3n**)

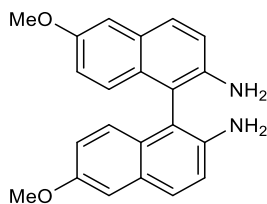

**3n**

Following the general protocol, compound **3n** was obtained in 83% yield as a white solid.  $R_f$  0.24 (n-hexane: ethyl acetate = 3:1).  $^1\text{H NMR}$  (500 MHz,  $\text{CDCl}_3$ )  $\delta$  7.70 (d,  $J = 8.7$  Hz, 2H), 7.14 (dd,  $J = 5.7, 3.0$  Hz, 4H), 6.99 (d,  $J = 9.1$  Hz, 2H), 6.90 (dd,  $J = 9.2, 2.6$  Hz, 2H), 3.88 (s, 6H).  $^{13}\text{C NMR}$  (126 MHz,  $\text{CDCl}_3$ )  $\delta$  155.5, 140.6, 129.4, 129.0, 128.2, 125.7, 119.1, 119.0, 113.8, 106.8, 55.3. **HRMS (ESI)** calcd for  $[\text{M}+\text{H}]^+$   $\text{C}_{22}\text{H}_{21}\text{N}_2\text{O}_2$ ,  $m/z$ : 345.1598, found: 345.1596.

### 6,6'-dimethyl-[1,1'-binaphthalene]-2,2'-diamine (**3o**)

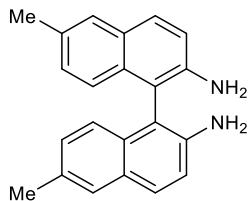

**3o**

Following the general protocol, compound **3o** was obtained in 89% yield as a white solid.  $R_f$  0.47 (*n*-hexane: ethyl acetate = 3:1).  $^1\text{H NMR}$  (500 MHz,  $\text{CDCl}_3$ )  $\delta$  7.75 (d,  $J = 8.8$  Hz, 2H), 7.60 (s, 2H), 7.15 (d,  $J = 8.7$  Hz, 2H), 7.07 (d,  $J = 8.7$  Hz, 2H), 7.01 (d,  $J = 8.6$  Hz, 2H).  $^{13}\text{C NMR}$  (126 MHz,  $\text{CDCl}_3$ )  $\delta$  141.8, 131.9, 131.8, 129.0, 128.8, 127.3, 124.0, 118.5, 113.1, 21.3. **HRMS (ESI)** calcd for  $[\text{M}+\text{H}]^+$   $\text{C}_{22}\text{H}_{21}\text{N}_2$ ,  $m/z$ : 313.1699, found: 313.1699.

### 6,6'-diphenyl-[1,1'-binaphthalene]-2,2'-diamine (**3r**)

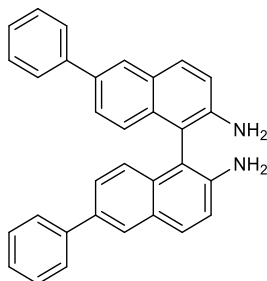

**3r**

Following the general protocol, compound **3r** was obtained in 85% yield as a white solid.  $R_f$  0.36 (*n*-hexane: ethyl acetate = 3:1).  $^1\text{H NMR}$  (500 MHz,  $\text{CDCl}_3$ )  $\delta$  8.05 (d,  $J = 1.9$  Hz, 2H), 7.91 (d,  $J = 8.8$  Hz, 2H), 7.69 (d,  $J = 6.9$  Hz, 4H), 7.53 (dd,  $J = 8.7, 2.0$  Hz, 2H), 7.47 (t,  $J = 7.7$  Hz, 4H), 7.35 (t,  $J = 7.4$  Hz, 2H), 7.23 (dd,  $J = 8.7, 3.7$  Hz, 4H).  $^{13}\text{C NMR}$  (126 MHz,  $\text{CDCl}_3$ )  $\delta$  142.9, 141.3, 135.3, 132.9, 123.0, 128.8 (3C), 127.1 (2C), 126.9, 126.5, 126.2, 124.3, 118.8, 112.4. **HRMS (ESI)** calcd for  $[\text{M}+\text{H}]^+$   $\text{C}_{32}\text{H}_{25}\text{N}_2$ ,  $m/z$ : 437.2012, found: 437.2011.

## Crystal Structure of **2z**

The Cambridge Crystallographic Data Centre (CCDC) has received the crystallographic data for compound **2z** (CCDC 2294982) which is accessible at no cost via [www.ccdc.cam.ac.uk/conts/retrieving.html](http://www.ccdc.cam.ac.uk/conts/retrieving.html).

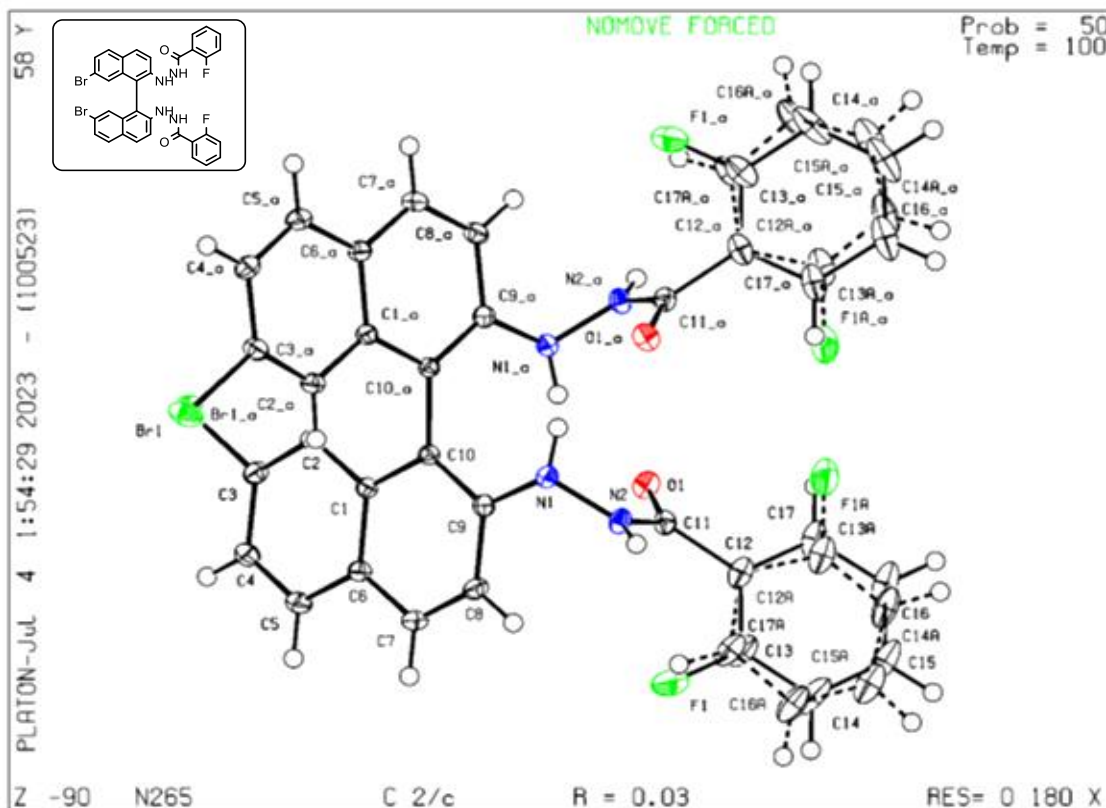

### Single Crystal Structure X-ray Analysis

|                     |                    |
|---------------------|--------------------|
| Sample Code:        | N265               |
| Sample ID:          | et-7br-bm          |
| Student/Researcher: | Emmanuella Twumasi |
| Supervisor:         | Lu Yixin           |
| CDCC:               | 2294982            |
| Date:               | 4-07-2023          |

Note: The crystal is monoclinic, space group C2/c. The asymmetric unit contains half a molecule of the compound  $C_{34}H_{22}Br_2F_2N_4O_2$ . The 1-fluoro-benzene group was disordered by flipping over with occupancy ratio =87:13.



Restraints in bond lengths and thermal parameters were applied to the disordered atoms. Hydrogens on the N atoms were located from different map. Final R values are R1=0.0266 and wR2=0.0665 for 2- theta up to 59°.

**Supplementary Table 3.** Crystal data and structure refinement for N265.

|                                   |                                             |                  |
|-----------------------------------|---------------------------------------------|------------------|
| Identification code               | N265                                        |                  |
| Empirical formula                 | C34 H22 Br2 F2 N4 O2                        |                  |
| Formula weight                    | 716.37                                      |                  |
| Temperature                       | 100(2) K                                    |                  |
| Wavelength                        | 0.71073 Å                                   |                  |
| Crystal system                    | Monoclinic                                  |                  |
| Space group                       | C2/c                                        |                  |
| Unit cell dimensions              | a = 13.8725(9) Å                            | a = 90°.         |
|                                   | b = 29.1188(18) Å                           | b = 127.298(2)°. |
|                                   | c = 9.3620(6) Å                             | g = 90°.         |
| Volume                            | 3008.4(3) Å <sup>3</sup>                    |                  |
| Z                                 | 4                                           |                  |
| Density (calculated)              | 1.582 Mg/m <sup>3</sup>                     |                  |
| Absorption coefficient            | 2.746 mm <sup>-1</sup>                      |                  |
| F(000)                            | 1432                                        |                  |
| Crystal size                      | 0.299 x 0.294 x 0.124 mm <sup>3</sup>       |                  |
| Theta range for data collection   | 2.293 to 29.579°.                           |                  |
| Index ranges                      | -19<=h<=19, -37<=k<=40, -13<=l<=12          |                  |
| Reflections collected             | 52265                                       |                  |
| Independent reflections           | 4220 [R(int) = 0.0480]                      |                  |
| Completeness to theta = 25.242°   | 99.6 %                                      |                  |
| Absorption correction             | Semi-empirical from equivalents             |                  |
| Max. and min. transmission        | 0.7459 and 0.6142                           |                  |
| Refinement method                 | Full-matrix least-squares on F <sup>2</sup> |                  |
| Data/restraints /parameters       | 4220 / 250 / 262                            |                  |
| Goodness-of-fit on F <sup>2</sup> | 1.034                                       |                  |
| Final R indices [I>2sigma(I)]     | R1 = 0.0266, wR2 = 0.0640                   |                  |

|                             |                                    |
|-----------------------------|------------------------------------|
| R indices (all data)        | R1 = 0.0313, wR2 = 0.0665          |
| Extinction coefficient      | n/a                                |
| Largest diff. peak and hole | 0.984 and -0.902 e.Å <sup>-3</sup> |

**Supplementary Table 4.** Atomic coordinates (  $\times 10^4$ ) and equivalent isotropic displacement parameters ( $\text{\AA}^2 \times 10^3$ ) for N265. U(eq) is defined as one-third of the trace of the orthogonalized  $U^{ij}$  tensor.

|       | x       | y       | z        | U(eq) |
|-------|---------|---------|----------|-------|
| Br(1) | 3911(1) | 2274(1) | 10129(1) | 26(1) |
| O(1)  | 3656(1) | 4855(1) | 6716(1)  | 19(1) |
| N(1)  | 4470(1) | 4300(1) | 5285(2)  | 15(1) |
| N(2)  | 3809(1) | 4709(1) | 4487(2)  | 15(1) |
| C(1)  | 3590(1) | 3290(1) | 6722(2)  | 13(1) |
| C(2)  | 4057(1) | 2987(1) | 8197(2)  | 15(1) |
| C(3)  | 3305(1) | 2668(1) | 8138(2)  | 17(1) |
| C(4)  | 2081(1) | 2620(1) | 6662(2)  | 18(1) |
| C(5)  | 1618(1) | 2908(1) | 5227(2)  | 18(1) |
| C(6)  | 2342(1) | 3249(1) | 5222(2)  | 15(1) |
| C(7)  | 1858(1) | 3559(1) | 3766(2)  | 18(1) |
| C(8)  | 2552(1) | 3900(1) | 3825(2)  | 17(1) |
| C(9)  | 3795(1) | 3946(1) | 5332(2)  | 14(1) |
| C(10) | 4333(1) | 3638(1) | 6746(2)  | 12(1) |
| C(11) | 3433(1) | 4960(1) | 5266(2)  | 16(1) |
| C(12) | 2724(2) | 5384(1) | 4273(2)  | 21(1) |
| C(13) | 1729(5) | 5388(1) | 2490(5)  | 28(1) |
| C(14) | 1063(4) | 5784(1) | 1629(5)  | 40(1) |
| C(15) | 1418(3) | 6186(1) | 2595(4)  | 40(1) |
| C(16) | 2412(3) | 6195(1) | 4394(4)  | 36(1) |

|        |          |         |          |       |
|--------|----------|---------|----------|-------|
| C(17)  | 3061(3)  | 5794(1) | 5242(4)  | 27(1) |
| F(1)   | 1400(1)  | 4988(1) | 1557(2)  | 36(1) |
| C(12A) | 2724(2)  | 5384(1) | 4273(2)  | 21(1) |
| C(13A) | 2870(30) | 5839(6) | 4860(20) | 30(3) |
| C(14A) | 2140(20) | 6197(6) | 3790(30) | 31(3) |
| C(15A) | 1160(20) | 6107(8) | 2070(30) | 33(3) |
| C(16A) | 1000(30) | 5679(8) | 1370(30) | 28(2) |
| C(17A) | 1790(30) | 5325(9) | 2390(30) | 22(2) |
| F(1A)  | 3867(9)  | 5855(3) | 6622(13) | 41(2) |

---

**Supplementary Table 5.** Bond lengths [ $\text{\AA}$ ] and angles [ $^\circ$ ] for N265.

---

|            |            |
|------------|------------|
| Br(1)-C(3) | 1.8962(14) |
| O(1)-C(11) | 1.2342(18) |
| N(1)-C(9)  | 1.4106(18) |
| N(1)-N(2)  | 1.4110(16) |
| N(1)-H(1)  | 0.86(2)    |
| N(2)-C(11) | 1.3406(19) |
| N(2)-H(2A) | 0.84(2)    |
| C(1)-C(2)  | 1.4220(19) |
| C(1)-C(6)  | 1.4270(18) |
| C(1)-C(10) | 1.4359(19) |
| C(2)-C(3)  | 1.372(2)   |
| C(2)-H(2)  | 0.9500     |
| C(3)-C(4)  | 1.404(2)   |
| C(4)-C(5)  | 1.369(2)   |
| C(4)-H(4)  | 0.9500     |
| C(5)-C(6)  | 1.415(2)   |
| C(5)-H(5)  | 0.9500     |
| C(6)-C(7)  | 1.419(2)   |

|               |            |
|---------------|------------|
| C(7)-C(8)     | 1.361(2)   |
| C(7)-H(7)     | 0.9500     |
| C(8)-C(9)     | 1.4260(19) |
| C(8)-H(8)     | 0.9500     |
| C(9)-C(10)    | 1.3848(18) |
| C(10)-C(10)#1 | 1.501(3)   |
| C(11)-C(12A)  | 1.499(2)   |
| C(11)-C(12)   | 1.499(2)   |
| C(12)-C(13)   | 1.378(4)   |
| C(12)-C(17)   | 1.399(3)   |
| C(13)-F(1)    | 1.357(4)   |
| C(13)-C(14)   | 1.388(3)   |
| C(14)-C(15)   | 1.377(4)   |
| C(14)-H(14)   | 0.9500     |
| C(15)-C(16)   | 1.387(4)   |
| C(15)-H(15)   | 0.9500     |
| C(16)-C(17)   | 1.393(3)   |
| C(16)-H(16)   | 0.9500     |
| C(17)-H(17)   | 0.9500     |
| C(12A)-C(13A) | 1.402(16)  |
| C(12A)-C(17A) | 1.429(17)  |
| C(13A)-F(1A)  | 1.367(15)  |
| C(13A)-C(14A) | 1.377(16)  |
| C(14A)-C(15A) | 1.362(16)  |
| C(14A)-H(14A) | 0.9500     |
| C(15A)-C(16A) | 1.363(16)  |
| C(15A)-H(15A) | 0.9500     |
| C(16A)-C(17A) | 1.378(17)  |
| C(16A)-H(16A) | 0.9500     |
| C(17A)-H(17A) | 0.9500     |

|                  |            |
|------------------|------------|
| C(9)-N(1)-N(2)   | 113.75(11) |
| C(9)-N(1)-H(1)   | 114.0(14)  |
| N(2)-N(1)-H(1)   | 109.8(14)  |
| C(11)-N(2)-N(1)  | 120.95(12) |
| C(11)-N(2)-H(2A) | 121.2(14)  |
| N(1)-N(2)-H(2A)  | 117.8(14)  |
| C(2)-C(1)-C(6)   | 118.12(12) |
| C(2)-C(1)-C(10)  | 121.52(12) |
| C(6)-C(1)-C(10)  | 120.33(12) |
| C(3)-C(2)-C(1)   | 119.53(13) |
| C(3)-C(2)-H(2)   | 120.2      |
| C(1)-C(2)-H(2)   | 120.2      |
| C(2)-C(3)-C(4)   | 122.98(13) |
| C(2)-C(3)-Br(1)  | 119.73(11) |
| C(4)-C(3)-Br(1)  | 117.28(11) |
| C(5)-C(4)-C(3)   | 118.20(13) |
| C(5)-C(4)-H(4)   | 120.9      |
| C(3)-C(4)-H(4)   | 120.9      |
| C(4)-C(5)-C(6)   | 121.48(13) |
| C(4)-C(5)-H(5)   | 119.3      |
| C(6)-C(5)-H(5)   | 119.3      |
| C(5)-C(6)-C(7)   | 121.73(13) |
| C(5)-C(6)-C(1)   | 119.67(13) |
| C(7)-C(6)-C(1)   | 118.60(13) |
| C(8)-C(7)-C(6)   | 120.88(13) |
| C(8)-C(7)-H(7)   | 119.6      |
| C(6)-C(7)-H(7)   | 119.6      |
| C(7)-C(8)-C(9)   | 120.70(13) |
| C(7)-C(8)-H(8)   | 119.7      |
| C(9)-C(8)-H(8)   | 119.7      |
| C(10)-C(9)-N(1)  | 121.31(12) |

|                      |            |
|----------------------|------------|
| C(10)-C(9)-C(8)      | 120.85(13) |
| N(1)-C(9)-C(8)       | 117.76(12) |
| C(9)-C(10)-C(1)      | 118.48(12) |
| C(9)-C(10)-C(10)#1   | 122.85(11) |
| C(1)-C(10)-C(10)#1   | 118.61(11) |
| O(1)-C(11)-N(2)      | 122.89(13) |
| O(1)-C(11)-C(12A)    | 121.26(13) |
| N(2)-C(11)-C(12A)    | 115.85(13) |
| O(1)-C(11)-C(12)     | 121.26(13) |
| N(2)-C(11)-C(12)     | 115.85(13) |
| C(13)-C(12)-C(17)    | 118.3(2)   |
| C(13)-C(12)-C(11)    | 123.92(19) |
| C(17)-C(12)-C(11)    | 117.74(16) |
| F(1)-C(13)-C(12)     | 118.1(2)   |
| F(1)-C(13)-C(14)     | 119.4(3)   |
| C(12)-C(13)-C(14)    | 122.5(3)   |
| C(15)-C(14)-C(13)    | 118.5(3)   |
| C(15)-C(14)-H(14)    | 120.7      |
| C(13)-C(14)-H(14)    | 120.7      |
| C(14)-C(15)-C(16)    | 120.7(2)   |
| C(14)-C(15)-H(15)    | 119.6      |
| C(16)-C(15)-H(15)    | 119.6      |
| C(15)-C(16)-C(17)    | 120.0(3)   |
| C(15)-C(16)-H(16)    | 120.0      |
| C(17)-C(16)-H(16)    | 120.0      |
| C(16)-C(17)-C(12)    | 120.0(2)   |
| C(16)-C(17)-H(17)    | 120.0      |
| C(12)-C(17)-H(17)    | 120.0      |
| C(13A)-C(12A)-C(17A) | 113.8(11)  |
| C(13A)-C(12A)-C(11)  | 130.5(7)   |
| C(17A)-C(12A)-C(11)  | 115.5(9)   |

|                      |           |
|----------------------|-----------|
| F(1A)-C(13A)-C(14A)  | 127.8(15) |
| F(1A)-C(13A)-C(12A)  | 107.9(11) |
| C(14A)-C(13A)-C(12A) | 124.3(13) |
| C(15A)-C(14A)-C(13A) | 118.8(17) |
| C(15A)-C(14A)-H(14A) | 120.6     |
| C(13A)-C(14A)-H(14A) | 120.6     |
| C(14A)-C(15A)-C(16A) | 120.1(16) |
| C(14A)-C(15A)-H(15A) | 119.9     |
| C(16A)-C(15A)-H(15A) | 119.9     |
| C(15A)-C(16A)-C(17A) | 121.2(18) |
| C(15A)-C(16A)-H(16A) | 119.4     |
| C(17A)-C(16A)-H(16A) | 119.4     |
| C(16A)-C(17A)-C(12A) | 120.9(17) |
| C(16A)-C(17A)-H(17A) | 119.5     |
| C(12A)-C(17A)-H(17A) | 119.5     |

---

Symmetry transformations used to generate equivalent atoms:

#1 -x+1,y,-z+3/2

**Supplementary Table 6.** Anisotropic displacement parameters ( $\text{\AA}^2 \times 10^3$ ) for N265. The anisotropic displacement factor exponent takes the form:  $-2p^2[h^2 a^*2U^{11} + \dots + 2hka^*b^*U^{12}]$

---

|       | U11   | U22   | U33   | U23   | U13   | U12  |
|-------|-------|-------|-------|-------|-------|------|
| Br(1) | 17(1) | 33(1) | 25(1) | 14(1) | 10(1) | 1(1) |
| O(1)  | 24(1) | 20(1) | 16(1) | 2(1)  | 14(1) | 4(1) |
| N(1)  | 14(1) | 13(1) | 15(1) | 1(1)  | 8(1)  | 1(1) |
| N(2)  | 20(1) | 14(1) | 15(1) | 3(1)  | 12(1) | 2(1) |
| C(1)  | 12(1) | 13(1) | 14(1) | -1(1) | 7(1)  | 1(1) |
| C(2)  | 12(1) | 17(1) | 14(1) | 1(1)  | 6(1)  | 1(1) |

|        |       |       |       |       |       |       |
|--------|-------|-------|-------|-------|-------|-------|
| C(3)   | 15(1) | 18(1) | 16(1) | 3(1)  | 9(1)  | 2(1)  |
| C(4)   | 15(1) | 18(1) | 20(1) | -1(1) | 9(1)  | -4(1) |
| C(5)   | 13(1) | 20(1) | 17(1) | -1(1) | 7(1)  | -2(1) |
| C(6)   | 12(1) | 15(1) | 14(1) | -1(1) | 7(1)  | 0(1)  |
| C(7)   | 12(1) | 20(1) | 14(1) | 0(1)  | 5(1)  | 1(1)  |
| C(8)   | 16(1) | 18(1) | 13(1) | 2(1)  | 7(1)  | 2(1)  |
| C(9)   | 14(1) | 14(1) | 14(1) | -1(1) | 9(1)  | 1(1)  |
| C(10)  | 11(1) | 12(1) | 13(1) | -1(1) | 7(1)  | 1(1)  |
| C(11)  | 17(1) | 14(1) | 18(1) | 0(1)  | 11(1) | -1(1) |
| C(12)  | 25(1) | 18(1) | 27(1) | 6(1)  | 21(1) | 6(1)  |
| C(13)  | 28(1) | 29(1) | 31(1) | 9(1)  | 19(1) | 12(1) |
| C(14)  | 42(1) | 40(2) | 40(1) | 22(1) | 26(1) | 26(1) |
| C(15)  | 54(2) | 32(1) | 54(2) | 25(1) | 42(2) | 26(1) |
| C(16)  | 53(2) | 20(1) | 54(2) | 12(1) | 43(1) | 13(1) |
| C(17)  | 38(2) | 17(1) | 38(1) | 5(1)  | 30(1) | 7(1)  |
| F(1)   | 26(1) | 39(1) | 25(1) | 1(1)  | 5(1)  | 5(1)  |
| C(12A) | 25(1) | 18(1) | 27(1) | 6(1)  | 21(1) | 6(1)  |
| C(13A) | 39(3) | 20(3) | 38(3) | 6(2)  | 28(3) | 8(3)  |
| C(14A) | 45(4) | 21(3) | 44(3) | 9(3)  | 36(3) | 15(3) |
| C(15A) | 45(3) | 27(3) | 41(3) | 15(3) | 33(3) | 15(3) |
| C(16A) | 35(3) | 29(3) | 36(3) | 13(3) | 29(2) | 19(3) |
| C(17A) | 25(3) | 26(3) | 28(2) | 12(3) | 23(2) | 13(3) |
| F(1A)  | 50(4) | 20(3) | 40(3) | -2(2) | 21(3) | 5(3)  |

---



**Supplementary Table 7.** Hydrogen coordinates ( $\times 10^4$ ) and isotropic displacement parameters ( $\text{\AA}^2 \times 10^3$ ) for N265.

---

|        | x        | y       | z        | U(eq) |
|--------|----------|---------|----------|-------|
| H(1)   | 5144(19) | 4359(7) | 6310(30) | 22(5) |
| H(2A)  | 3703(19) | 4800(7) | 3550(30) | 24(5) |
| H(2)   | 4883     | 3005    | 9217     | 18    |
| H(4)   | 1586     | 2393    | 6658     | 22    |
| H(5)   | 793      | 2877    | 4212     | 21    |
| H(7)   | 1038     | 3528    | 2736     | 21    |
| H(8)   | 2205     | 4110    | 2853     | 20    |
| H(14)  | 378      | 5777    | 400      | 48    |
| H(15)  | 978      | 6461    | 2023     | 48    |
| H(16)  | 2650     | 6475    | 5047     | 43    |
| H(17)  | 3732     | 5799    | 6480     | 32    |
| H(14A) | 2304     | 6502    | 4245     | 38    |
| H(15A) | 591      | 6342    | 1355     | 39    |
| H(16A) | 339      | 5623    | 149      | 34    |
| H(17A) | 1704     | 5039    | 1843     | 27    |

---

**Supplementary Table 8.** Torsion angles [°] for N265.

---

|                         |             |
|-------------------------|-------------|
| C(9)-N(1)-N(2)-C(11)    | 66.65(17)   |
| C(6)-C(1)-C(2)-C(3)     | 0.1(2)      |
| C(10)-C(1)-C(2)-C(3)    | 178.17(13)  |
| C(1)-C(2)-C(3)-C(4)     | 0.8(2)      |
| C(1)-C(2)-C(3)-Br(1)    | -178.20(10) |
| C(2)-C(3)-C(4)-C(5)     | -0.6(2)     |
| Br(1)-C(3)-C(4)-C(5)    | 178.49(12)  |
| C(3)-C(4)-C(5)-C(6)     | -0.7(2)     |
| C(4)-C(5)-C(6)-C(7)     | -177.84(14) |
| C(4)-C(5)-C(6)-C(1)     | 1.6(2)      |
| C(2)-C(1)-C(6)-C(5)     | -1.3(2)     |
| C(10)-C(1)-C(6)-C(5)    | -179.36(13) |
| C(2)-C(1)-C(6)-C(7)     | 178.17(13)  |
| C(10)-C(1)-C(6)-C(7)    | 0.1(2)      |
| C(5)-C(6)-C(7)-C(8)     | 176.66(14)  |
| C(1)-C(6)-C(7)-C(8)     | -2.8(2)     |
| C(6)-C(7)-C(8)-C(9)     | 1.9(2)      |
| N(2)-N(1)-C(9)-C(10)    | -145.63(13) |
| N(2)-N(1)-C(9)-C(8)     | 37.75(17)   |
| C(7)-C(8)-C(9)-C(10)    | 1.7(2)      |
| C(7)-C(8)-C(9)-N(1)     | 178.39(13)  |
| N(1)-C(9)-C(10)-C(1)    | 179.14(12)  |
| C(8)-C(9)-C(10)-C(1)    | -4.3(2)     |
| N(1)-C(9)-C(10)-C(10)#1 | -3.9(2)     |
| C(8)-C(9)-C(10)-C(10)#1 | 172.66(13)  |
| C(2)-C(1)-C(10)-C(9)    | -174.60(13) |
| C(6)-C(1)-C(10)-C(9)    | 3.41(19)    |
| C(2)-C(1)-C(10)-C(10)#1 | 8.3(2)      |
| C(6)-C(1)-C(10)-C(10)#1 | -173.71(13) |

|                             |             |
|-----------------------------|-------------|
| N(1)-N(2)-C(11)-O(1)        | 1.3(2)      |
| N(1)-N(2)-C(11)-C(12A)      | -179.15(12) |
| N(1)-N(2)-C(11)-C(12)       | -179.15(12) |
| O(1)-C(11)-C(12)-C(13)      | -128.7(4)   |
| N(2)-C(11)-C(12)-C(13)      | 51.8(4)     |
| O(1)-C(11)-C(12)-C(17)      | 48.0(3)     |
| N(2)-C(11)-C(12)-C(17)      | -131.6(3)   |
| C(17)-C(12)-C(13)-F(1)      | -179.5(4)   |
| C(11)-C(12)-C(13)-F(1)      | -2.9(8)     |
| C(17)-C(12)-C(13)-C(14)     | 0.7(8)      |
| C(11)-C(12)-C(13)-C(14)     | 177.4(4)    |
| F(1)-C(13)-C(14)-C(15)      | -179.4(5)   |
| C(12)-C(13)-C(14)-C(15)     | 0.3(9)      |
| C(13)-C(14)-C(15)-C(16)     | -0.7(7)     |
| C(14)-C(15)-C(16)-C(17)     | -0.1(6)     |
| C(15)-C(16)-C(17)-C(12)     | 1.2(6)      |
| C(13)-C(12)-C(17)-C(16)     | -1.5(6)     |
| C(11)-C(12)-C(17)-C(16)     | -178.3(3)   |
| O(1)-C(11)-C(12A)-C(13A)    | 50(2)       |
| N(2)-C(11)-C(12A)-C(13A)    | -129(2)     |
| O(1)-C(11)-C(12A)-C(17A)    | -134(2)     |
| N(2)-C(11)-C(12A)-C(17A)    | 47(2)       |
| C(17A)-C(12A)-C(13A)-F(1A)  | -174(3)     |
| C(11)-C(12A)-C(13A)-F(1A)   | 2(4)        |
| C(17A)-C(12A)-C(13A)-C(14A) | 5(5)        |
| C(11)-C(12A)-C(13A)-C(14A)  | -179(2)     |
| F(1A)-C(13A)-C(14A)-C(15A)  | -178(3)     |
| C(12A)-C(13A)-C(14A)-C(15A) | 3(5)        |
| C(13A)-C(14A)-C(15A)-C(16A) | -7(5)       |
| C(14A)-C(15A)-C(16A)-C(17A) | 3(5)        |
| C(15A)-C(16A)-C(17A)-C(12A) | 6(6)        |

|                             |        |
|-----------------------------|--------|
| C(13A)-C(12A)-C(17A)-C(16A) | -10(5) |
| C(11)-C(12A)-C(17A)-C(16A)  | 174(3) |

Symmetry transformations used to generate equivalent atoms:

#1 -x+1,y,-z+3/2

**Supplementary Table 9.** Hydrogen bonds for N265 [ $\text{\AA}$  and  $^\circ$ ].

| D-H...A             | d(D-H)  | d(H...A) | d(D...A)   | $\angle(\text{DHA})$ |
|---------------------|---------|----------|------------|----------------------|
| N(1)-H(1)...O(1)#1  | 0.86(2) | 2.13(2)  | 2.9000(16) | 148.8(18)            |
| N(2)-H(2A)...O(1)#2 | 0.84(2) | 1.96(2)  | 2.7781(16) | 166(2)               |

Symmetry transformations used to generate equivalent atoms:

#1 -x+1,y,-z+3/2 #2 x,-y+1,z-1/2

## References

1. Qi, L.-W.; Mao, J.-H.; Zhang, J.; Tan, B., Organocatalytic asymmetric arylation of indoles enabled by azo groups. *Nat. Chem.* **2018**, *10*, 58.
2. Xu, W.-L.; Zhao, W.-M.; Zhang, R.-X.; Chen, J.; Zhou, L., Organocatalytic cycloaddition–elimination cascade for atroposelective construction of heterobiaryls. *Chem. Sci.* **2021**, *12*, 14920.
3. Hu, Y.-L.; Wang, Z.; Yang, H.; Chen, J.; Wu, Z.-B.; Lei, Y.; Zhou, L., Conversion of two stereocenters to one or two chiral axes: atroposelective synthesis of 2,3-diarylbenzoindoles. *Chem. Sci.* **2019**, *10*, 6777.

# Copies of NMR Spectra

et-b6-4f-azo-129  
 et-b6-4f-azo

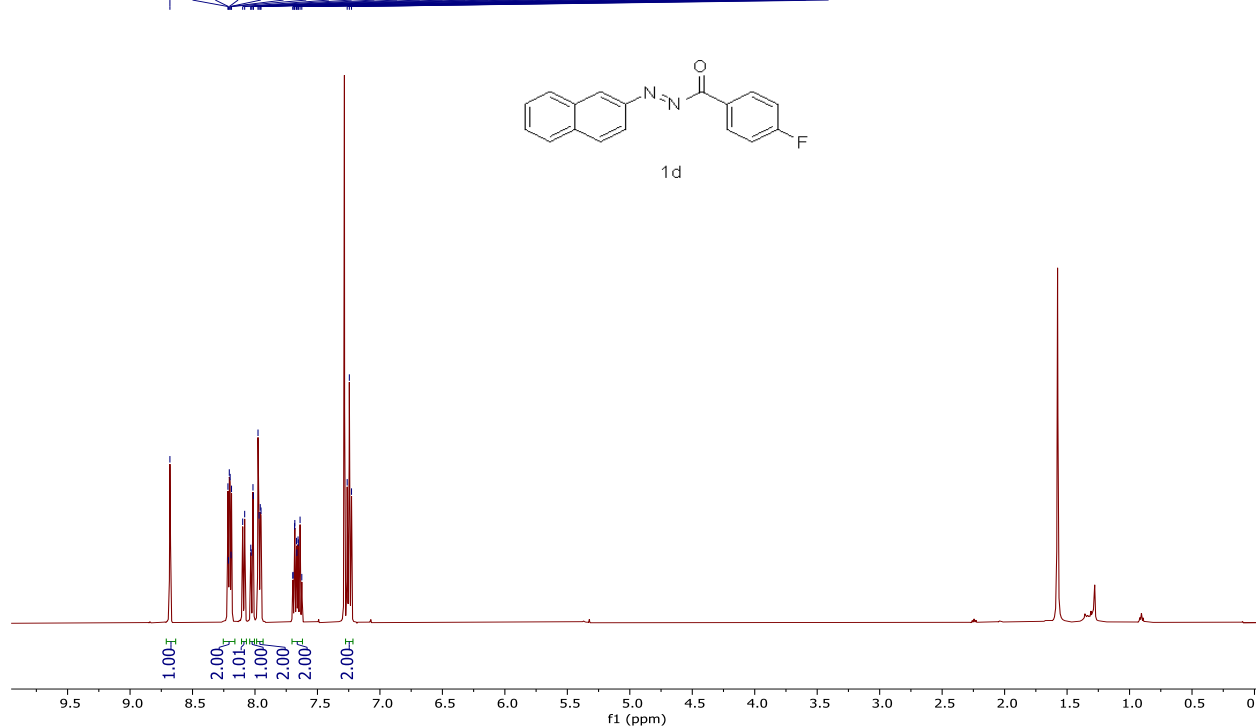

et-b6-4f-azo-c13  
 et-b6-4f-azo-c13

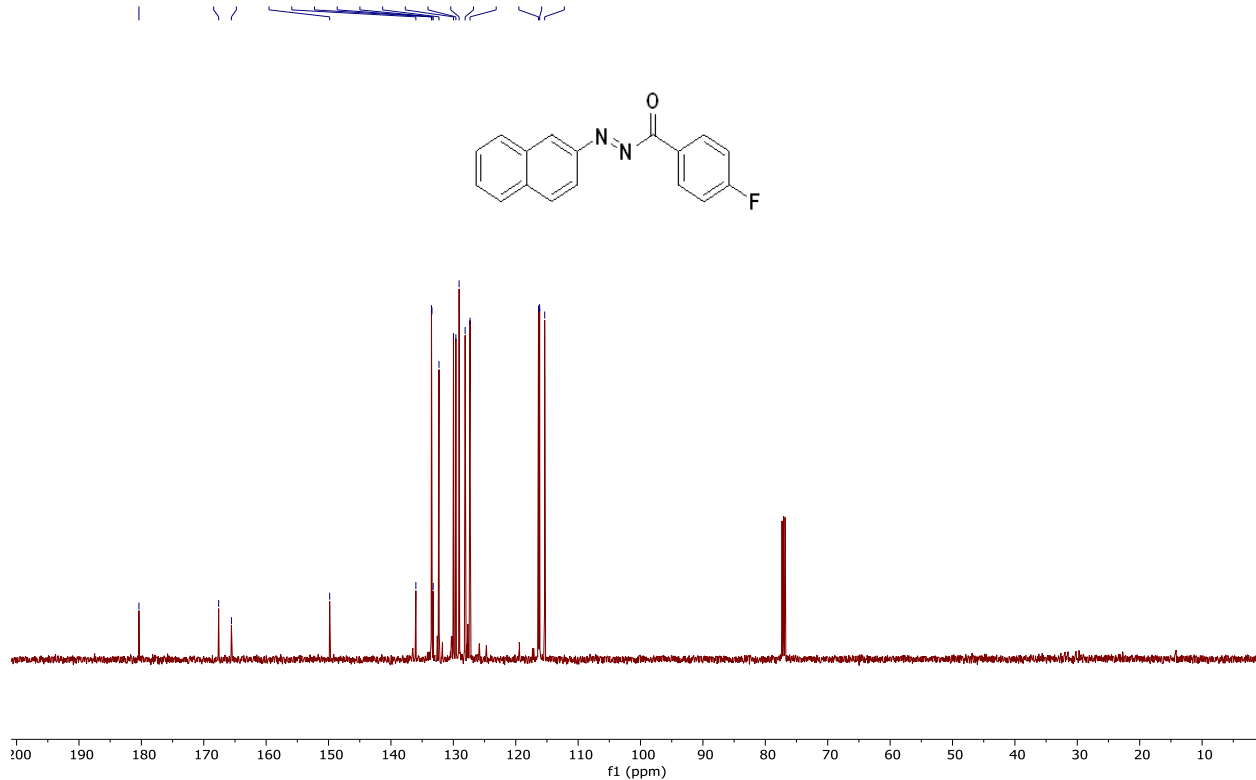

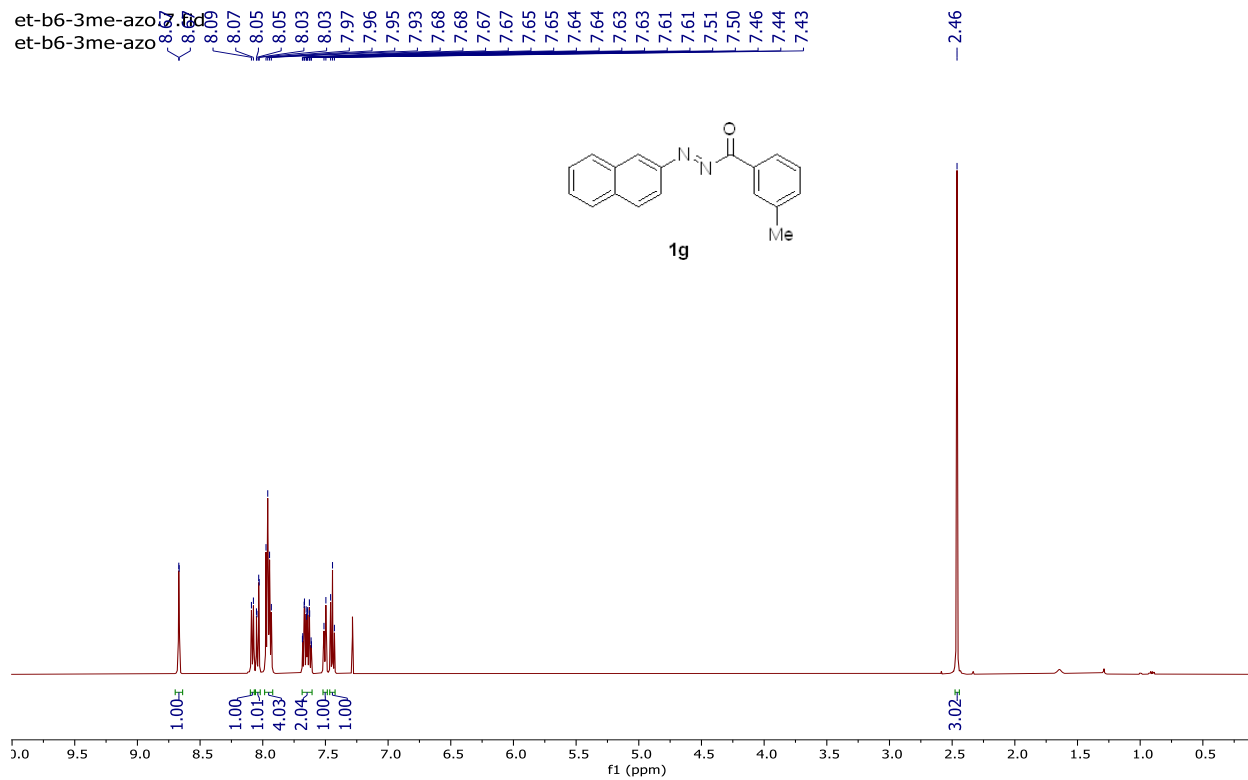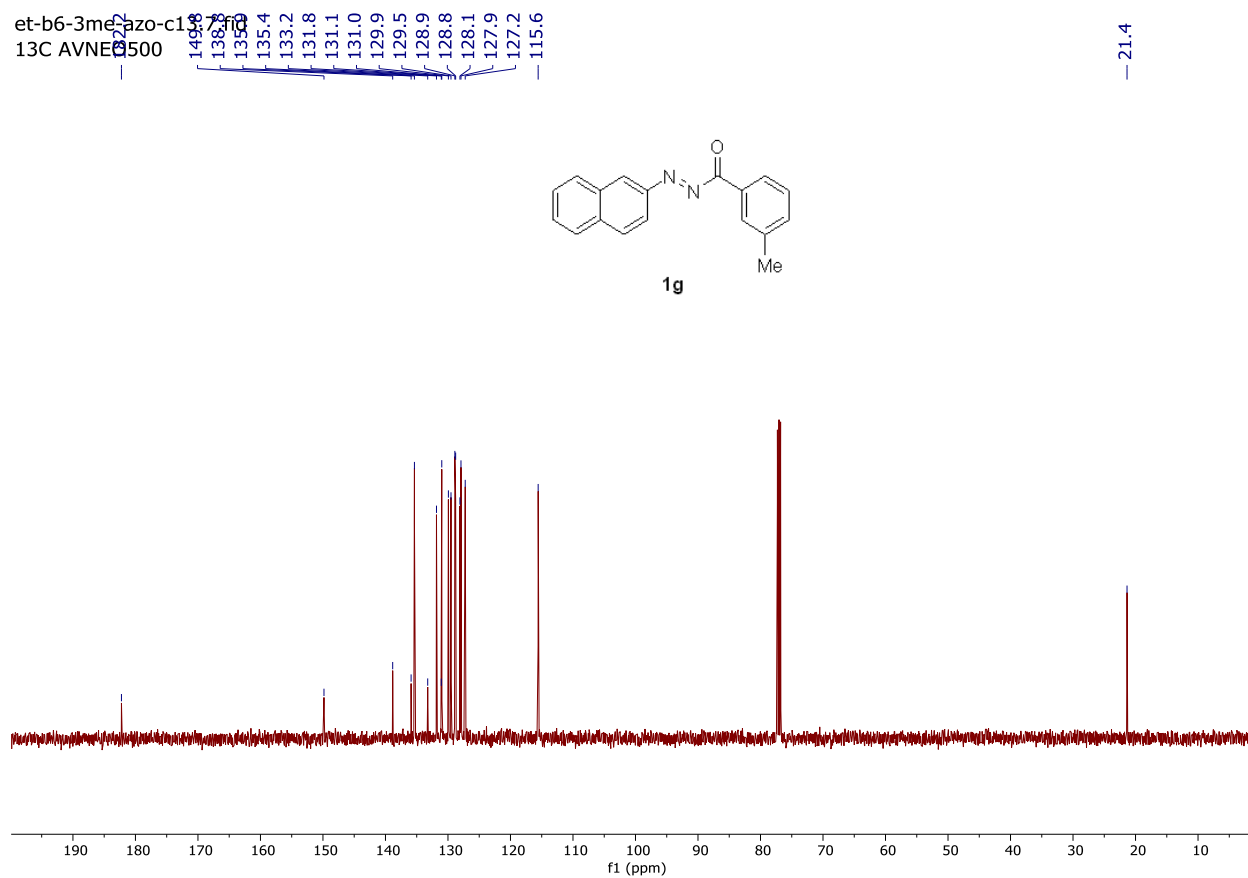

Aug23-2023-et-b6-2bzf-320-c13.6.ft  
 Aug23-2023-et-b6-2bzf-320-c13

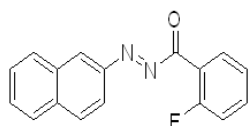

1i

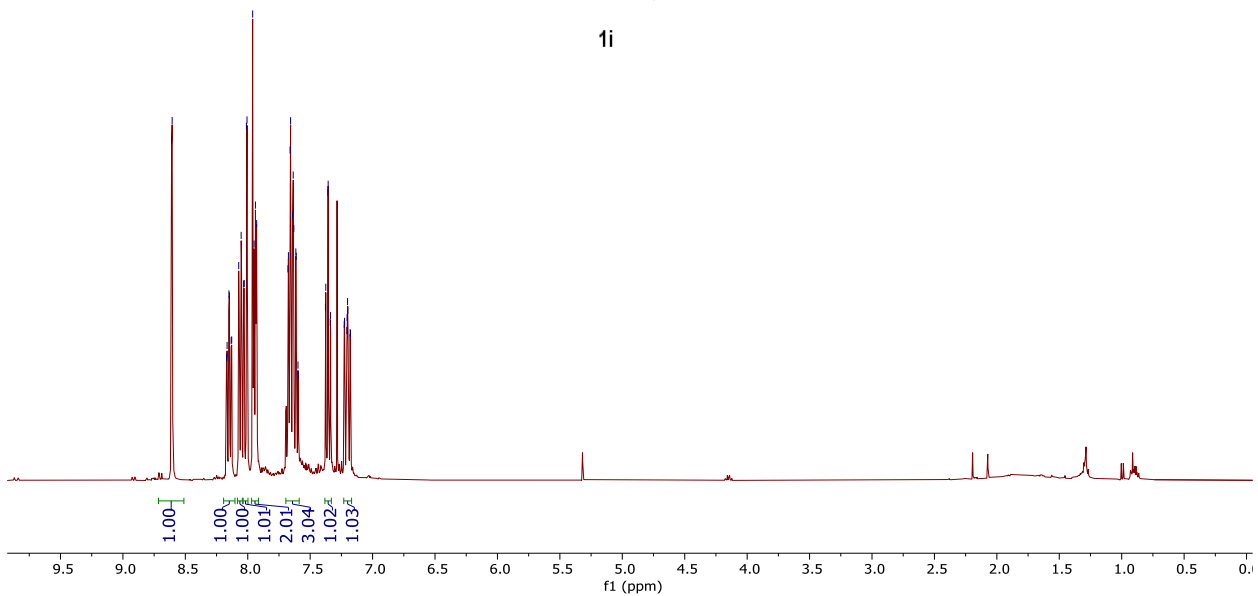

et-b6-2bzf-320-c13.6.ft  
 et-b6-2bzf-320-c13

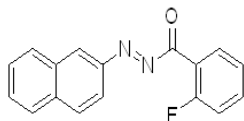

1i

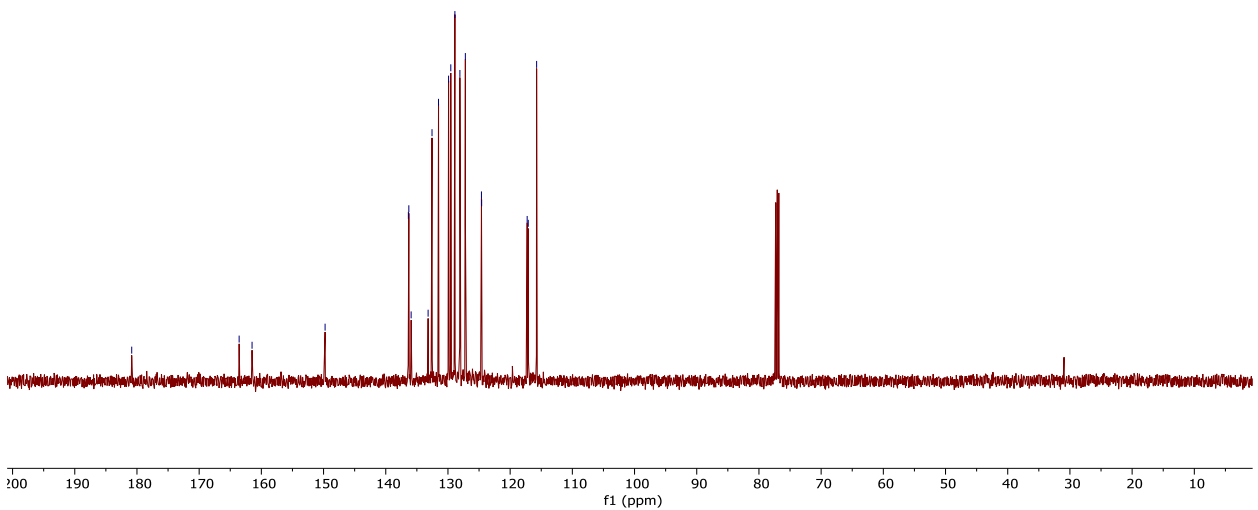

Aug23-2023-et-b6-1-np-azo.10.fid

Aug23-2023-et-b6-1-np-azo

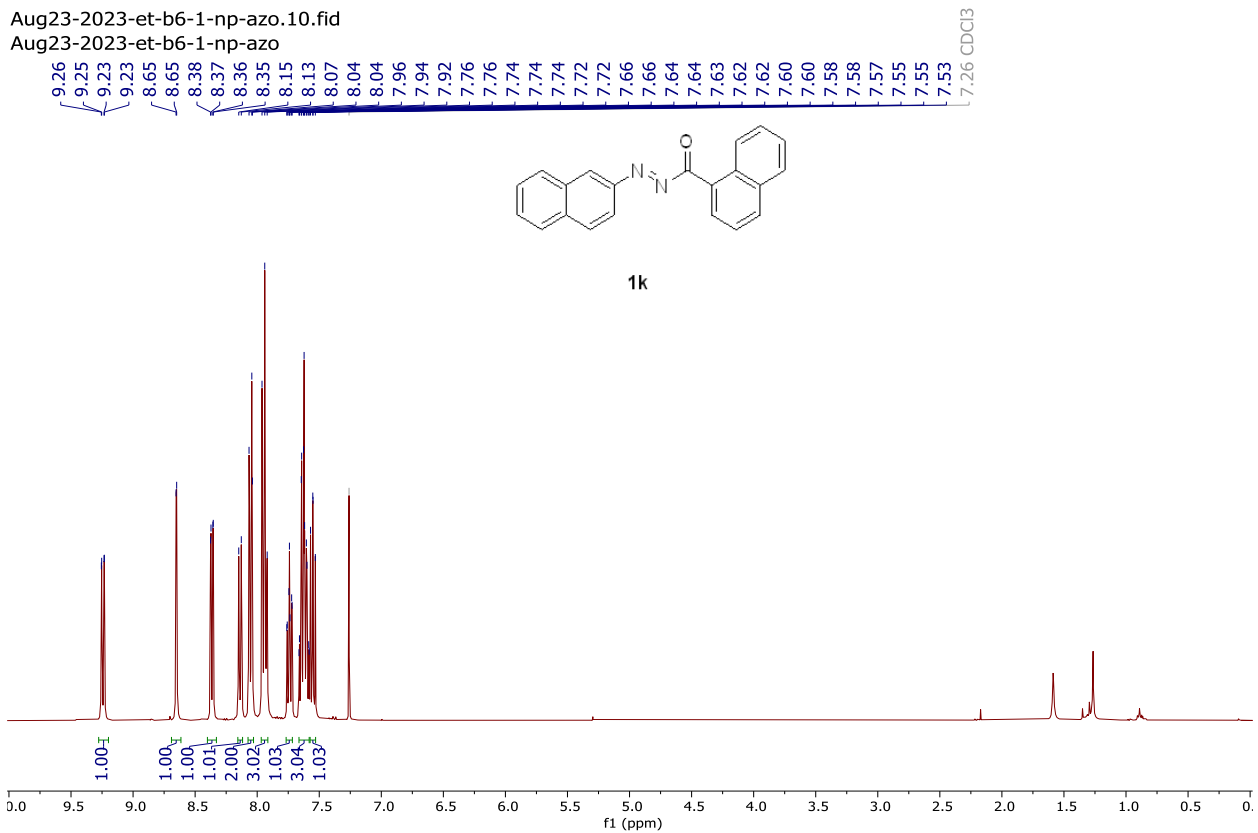

et-b6-1nph-azo-c13.6.fid

et-b6-1nph-azo-c13

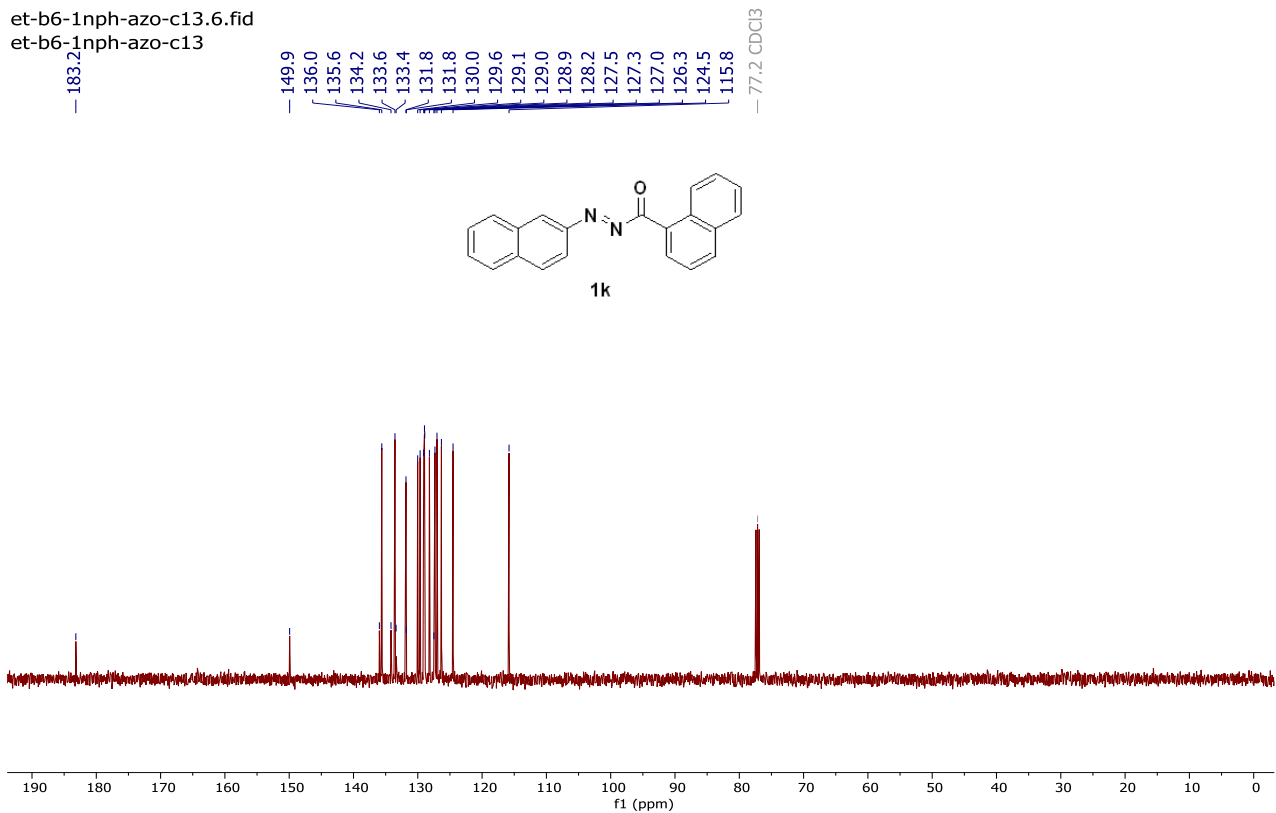



Aug23-2023-et-b6-2-np-azo.10.fid  
Aug23-2023-et-b6-2-np-azo

8.69  
8.67  
8.20  
8.19  
8.17  
8.17  
8.10  
8.10  
8.08  
8.07  
8.07  
7.99  
7.99  
7.97  
7.96  
7.94  
7.91  
7.68  
7.67  
7.66  
7.66  
7.65  
7.64  
7.64  
7.63  
7.62  
7.60  
7.59  
7.59  
7.57  
7.55  
7.26 CDCl<sub>3</sub>

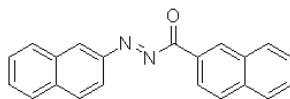

11

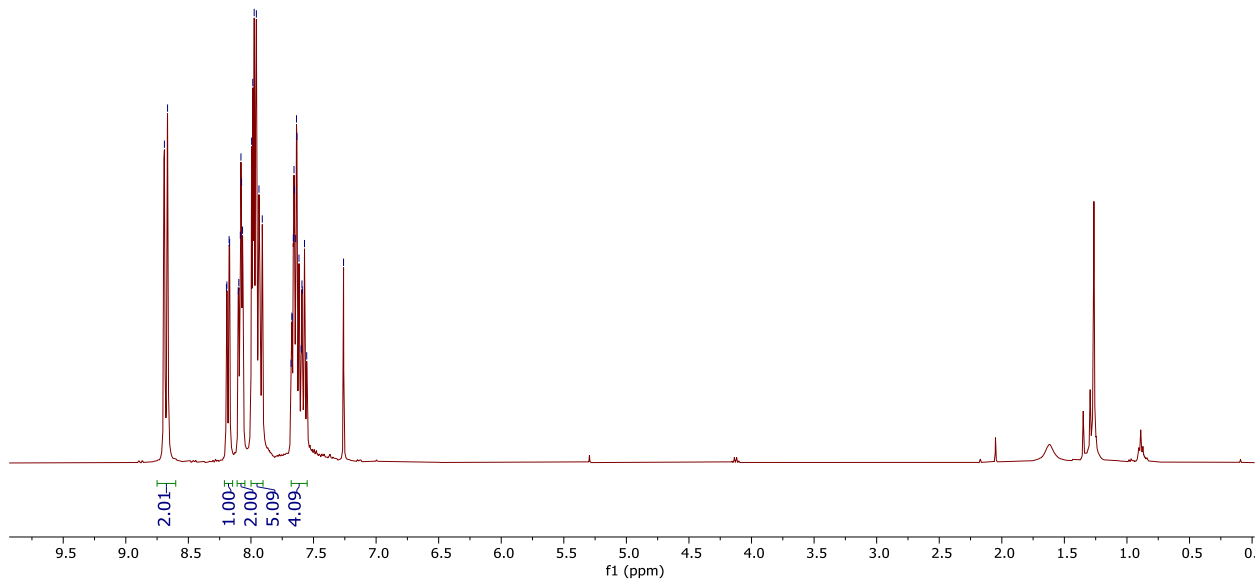

et-b6-2nph-azo-c13.6.fid  
et-b6-2nph-azo-c13

182.2  
150.3  
136.6  
136.3  
133.7  
133.6  
132.8  
132.5  
130.3  
130.2  
129.9  
129.7  
129.3  
129.3  
128.9  
128.5  
128.4  
127.6  
127.4  
125.6  
116.0  
77.2 CDCl<sub>3</sub>

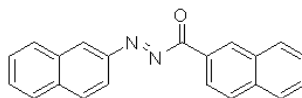

11

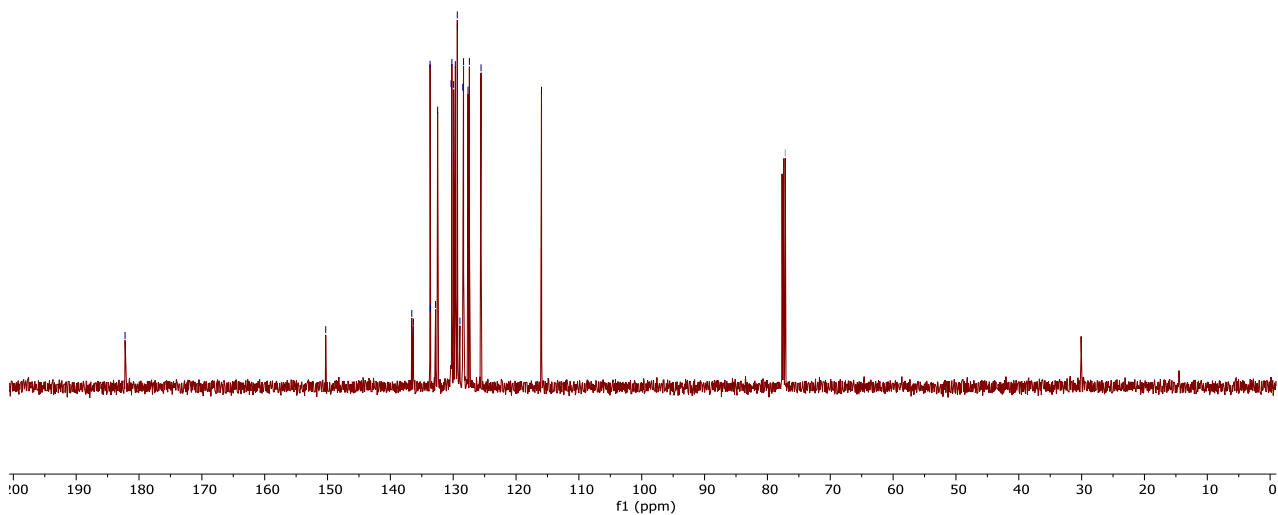

et-b6-rbzff-azo-c13.6  
et-b6-rbzff-azo-c13

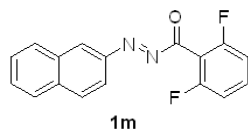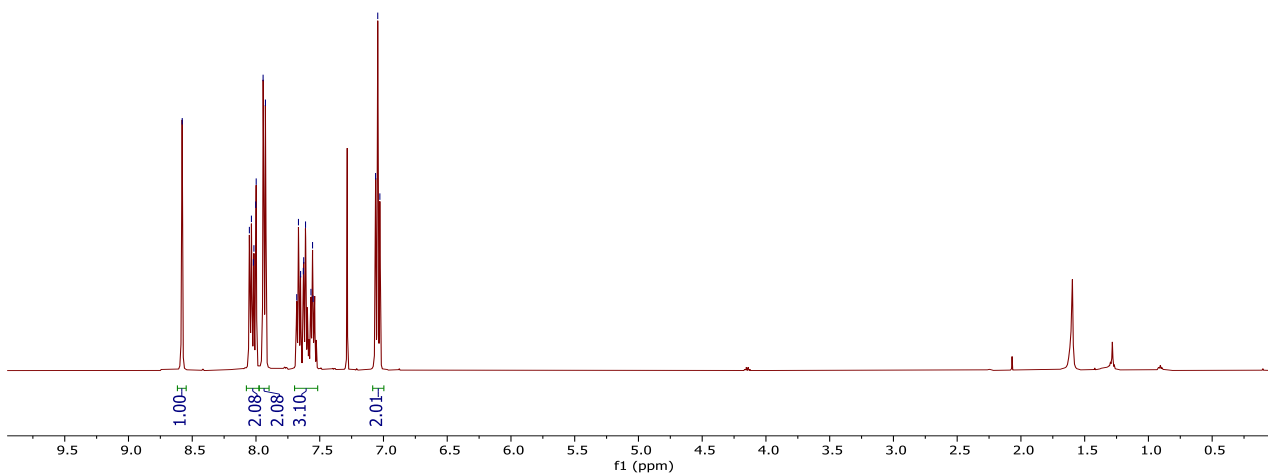

et-b6-rbzff-azo-c13.6  
et-b6-rbzff-azo-c13

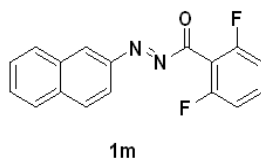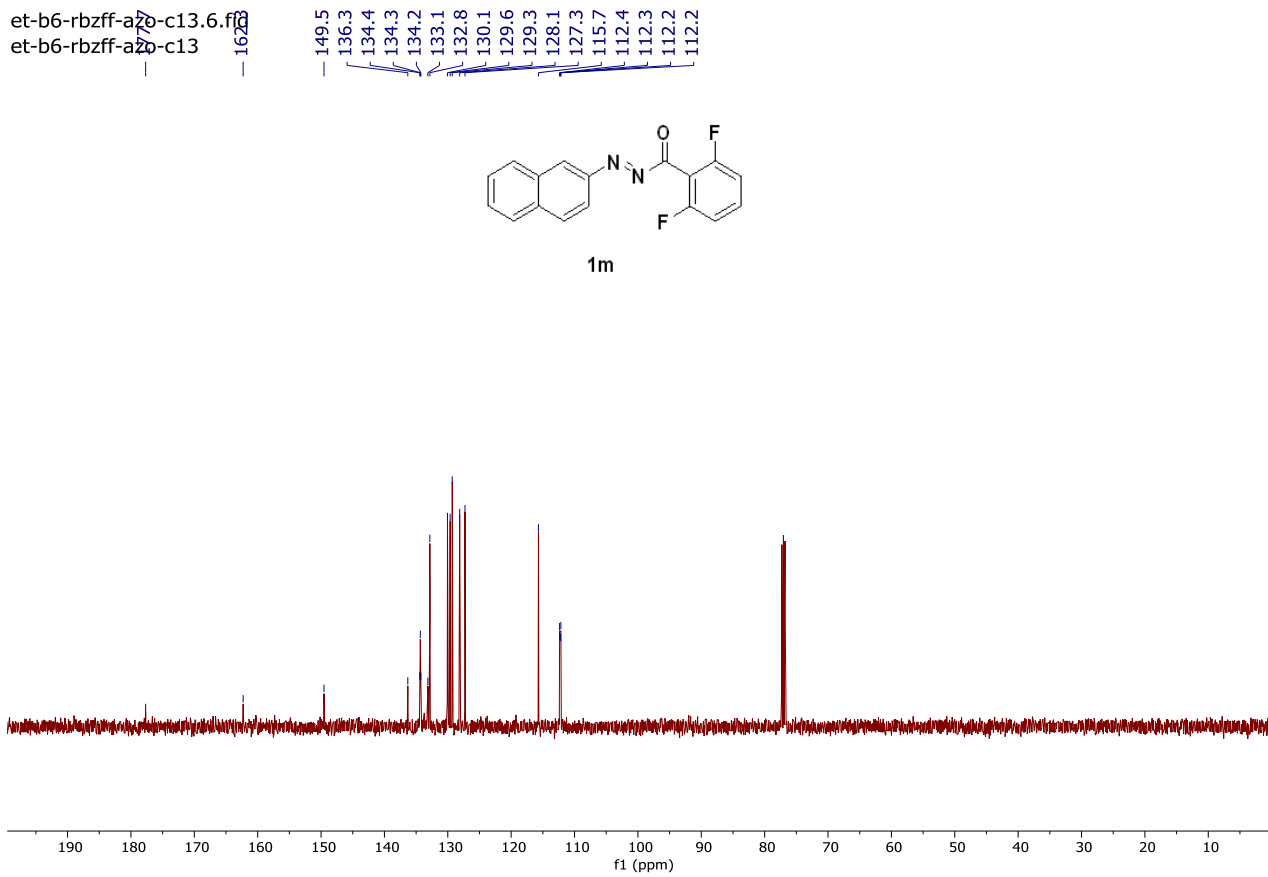

et-6ome-az.8.fid  
 et-6ome-az

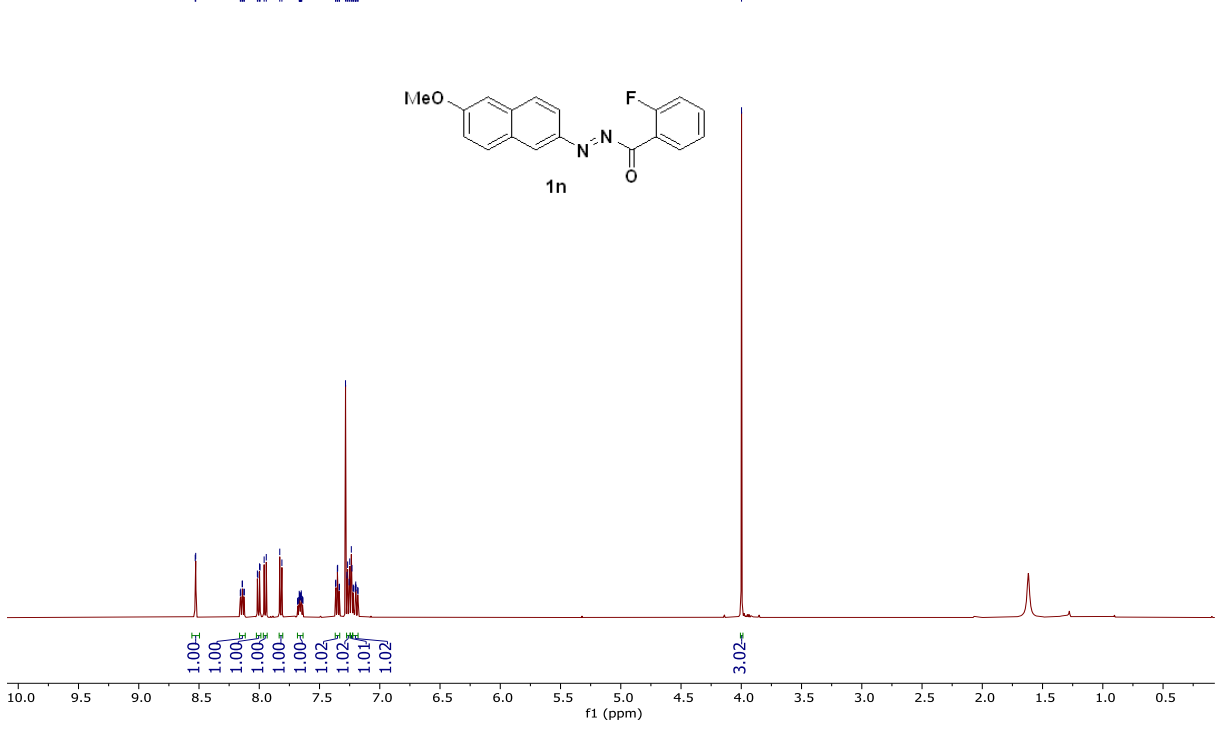

et-b6-6-omg-azo-c136.fid  
 et-b6-6-omg-azo-c136.fid

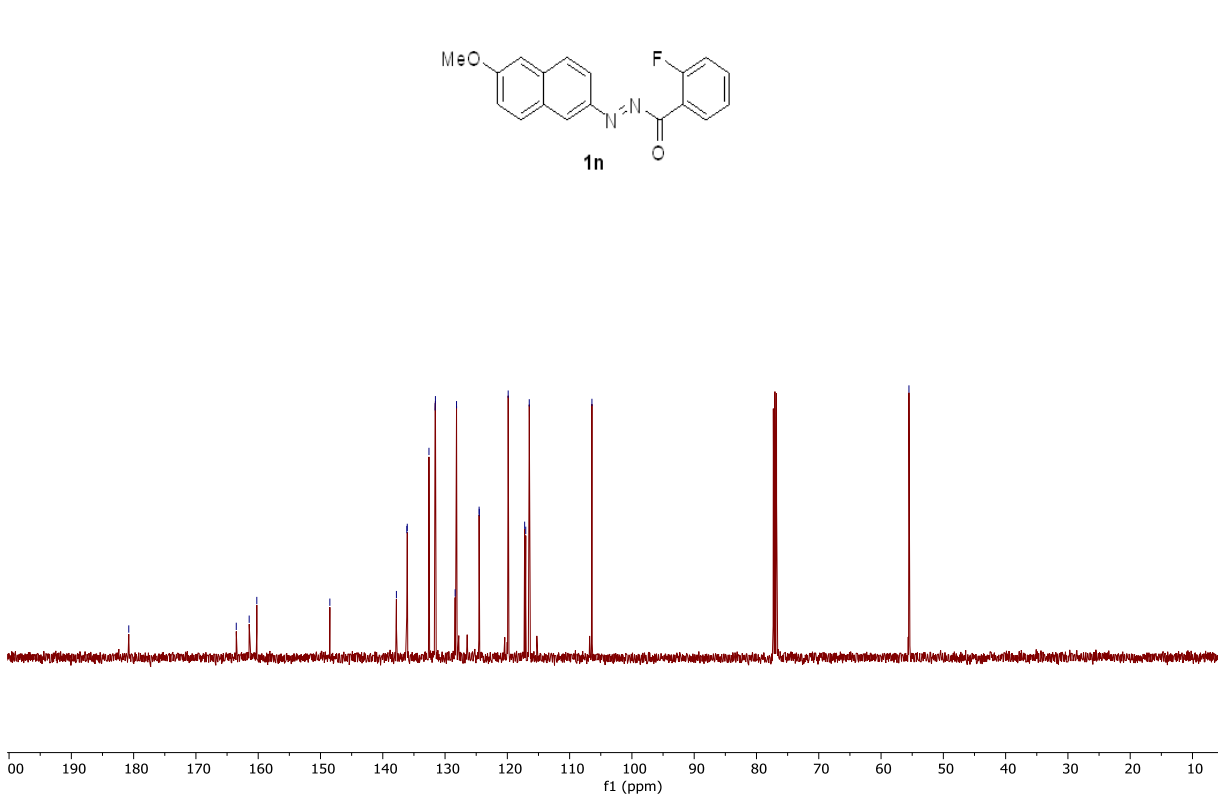

Sep15-2023-et-b6-6me-azo.10.fid

Sep15-2023-et-b6-6me-azo

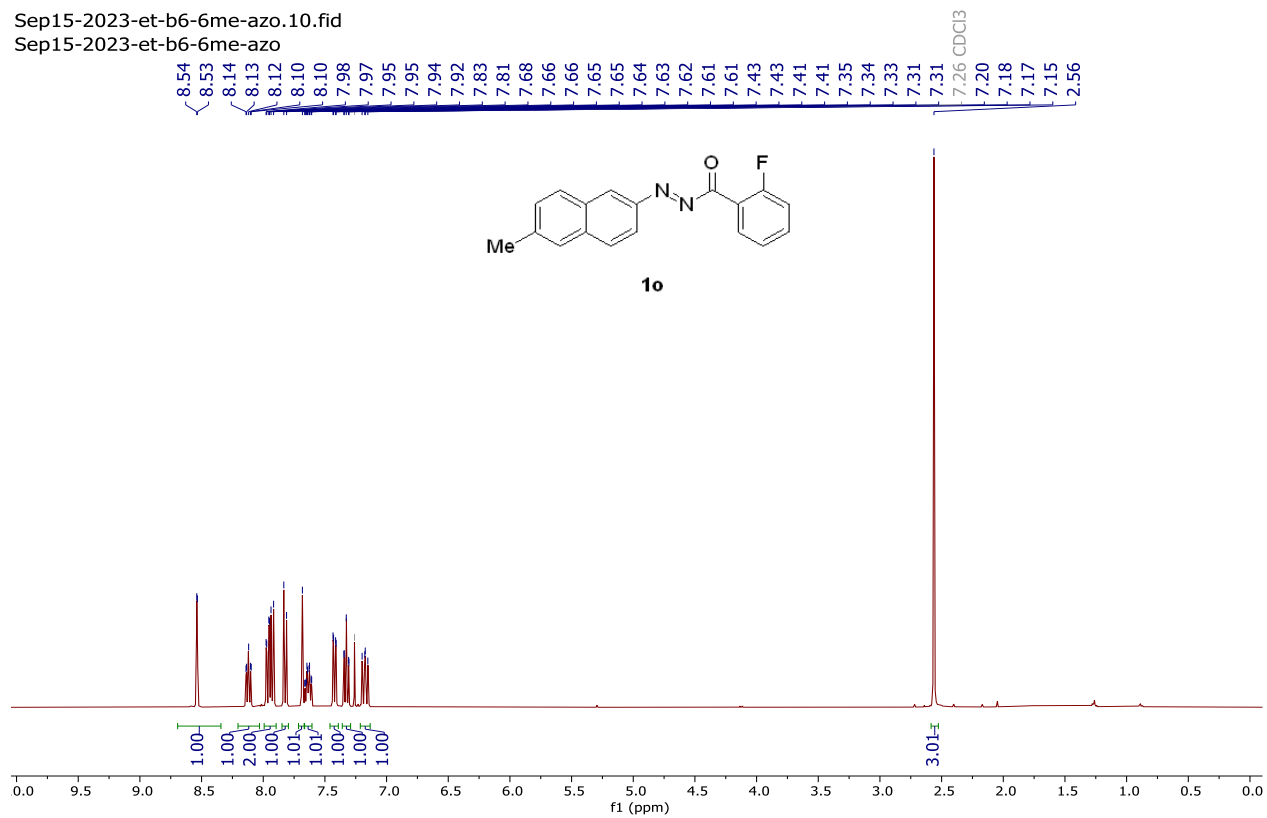

et-6me-azo 13.6.fid

et-6me-azo 13

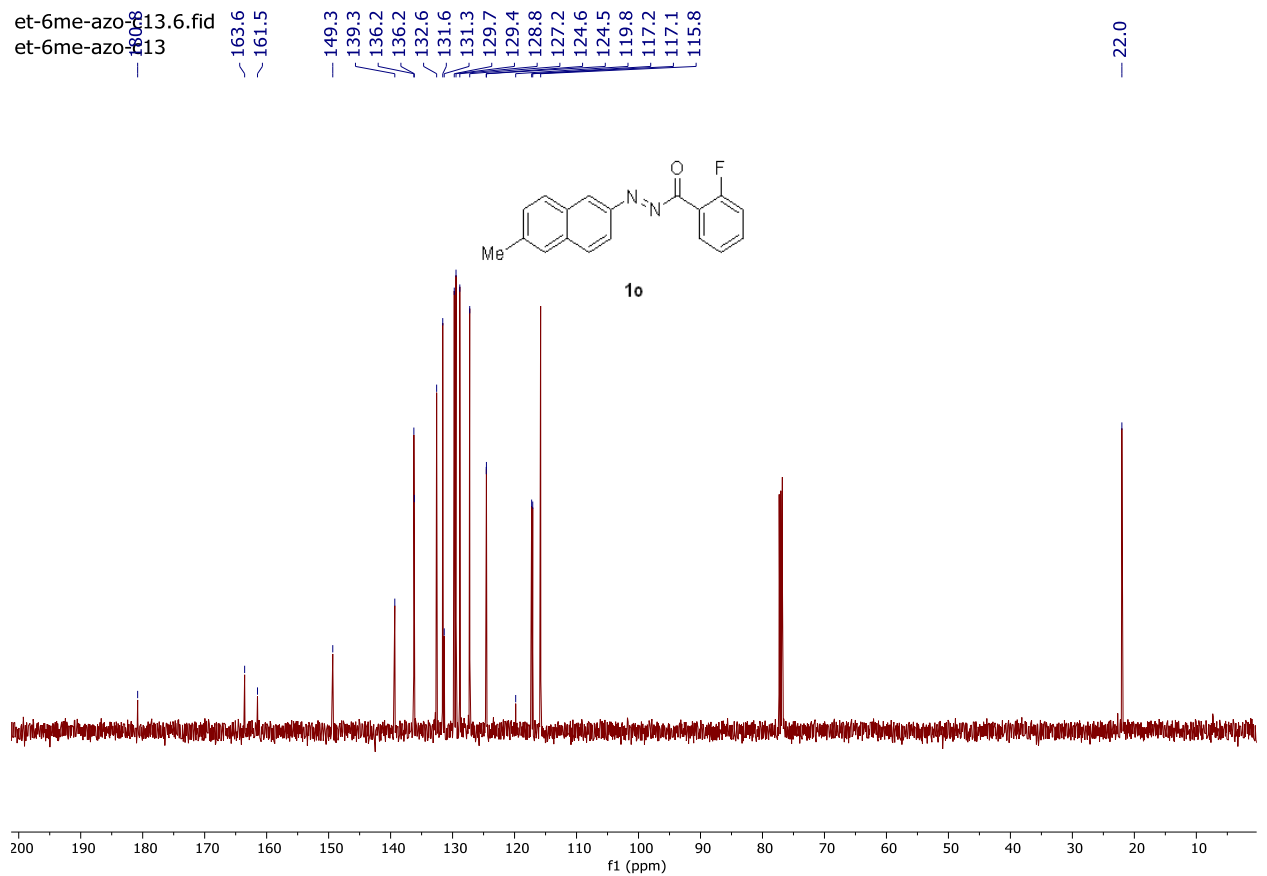



et-b6-cyhx-az-2.6.fid  
et-b6-cyhx-az-2

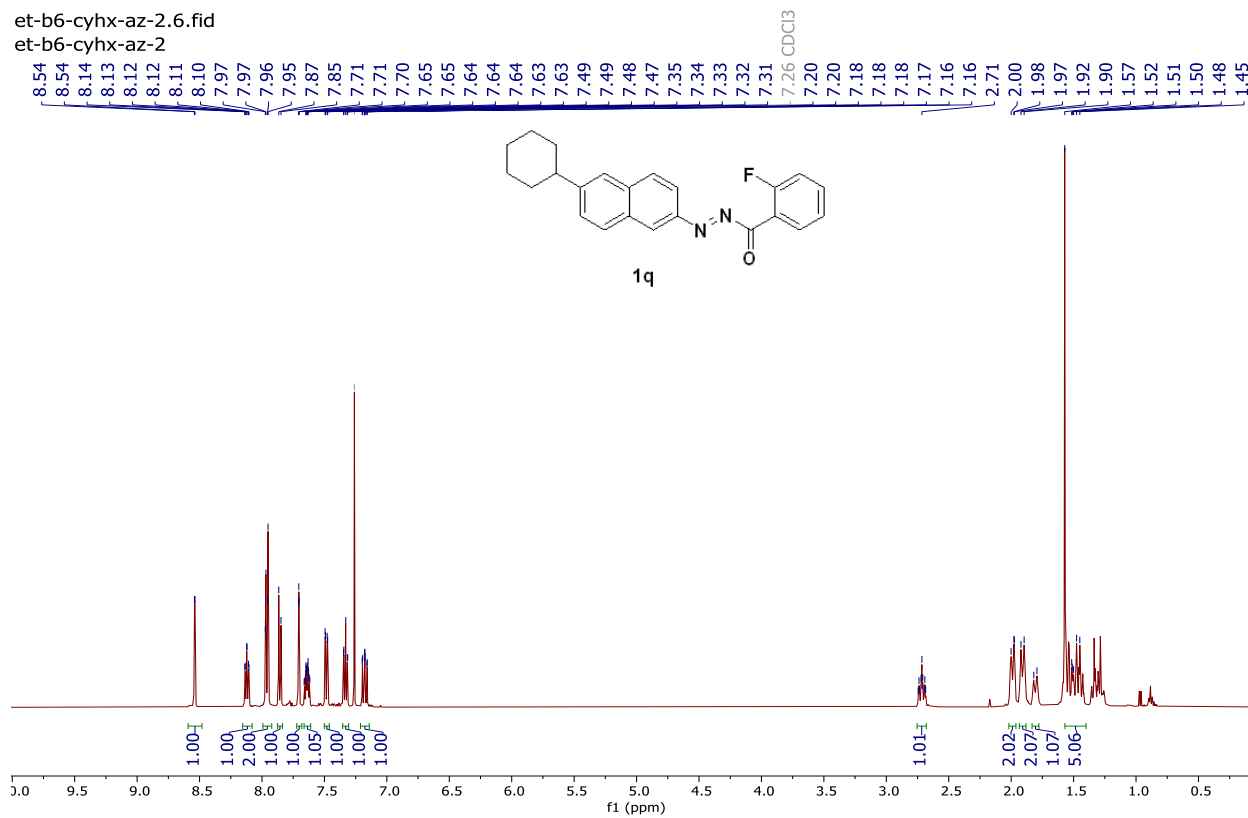

et-b6-cyhx-az-2-c13.6.fid  
13C AVNEC800

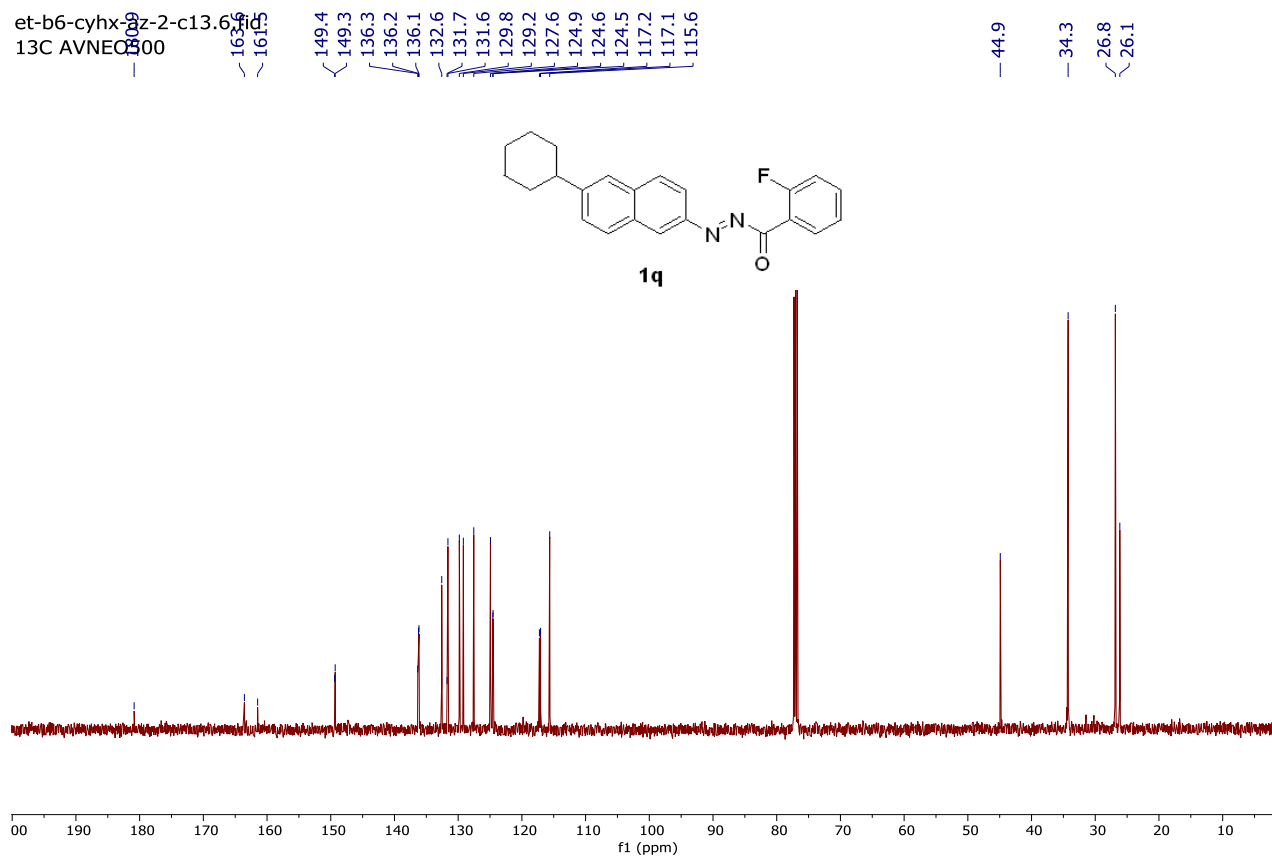

et-b6-6ph-azo 8.63  
et-b6-6ph-azo 8.61  
8.18  
8.16  
8.15  
8.15  
8.14  
8.12  
8.06  
8.04  
8.04  
8.01  
7.99  
7.89  
7.89  
7.88  
7.87  
7.79  
7.77  
7.70  
7.69  
7.69  
7.68  
7.68  
7.68  
7.67  
7.67  
7.66  
7.66  
7.65  
7.65  
7.56  
7.55  
7.53  
7.47  
7.45  
7.44  
7.38  
7.37  
7.35  
7.28  
7.23  
7.21  
7.21  
7.19

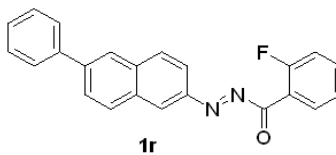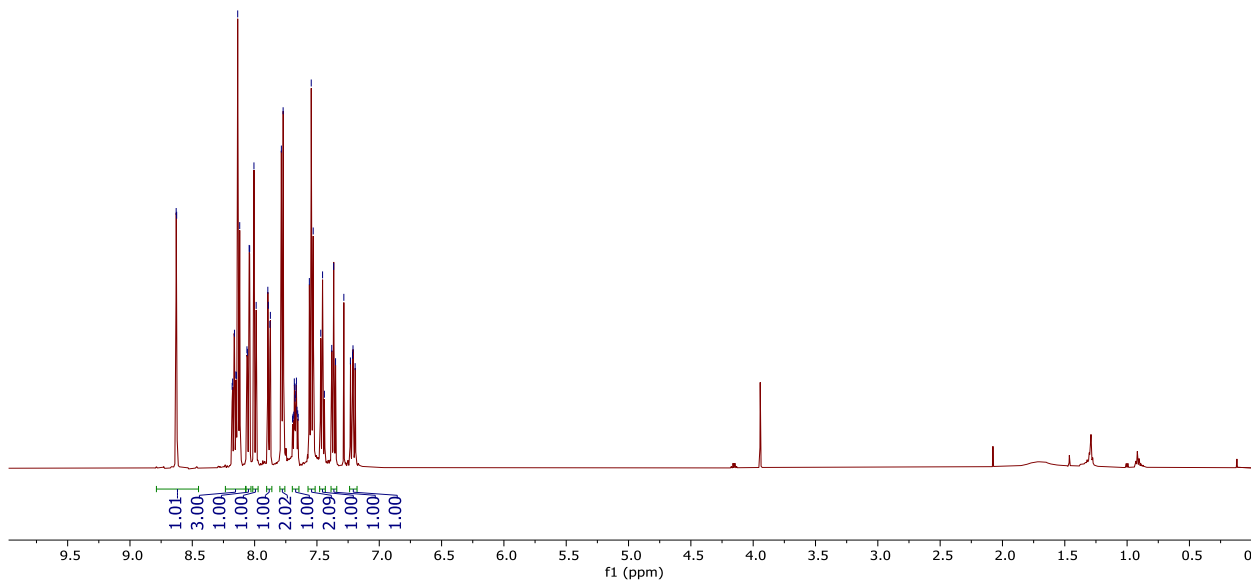

et-b6-6ph-azo-c13 149.8  
et-b6-6ph-azo-c13 141.7  
140.4  
136.3  
136.3  
132.6  
132.3  
131.3  
130.4  
129.8  
129.1  
128.0  
127.5  
126.9  
125.9  
124.6  
124.6  
117.3  
117.1  
116.3

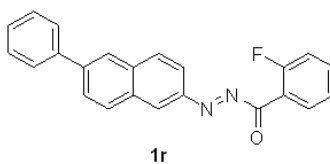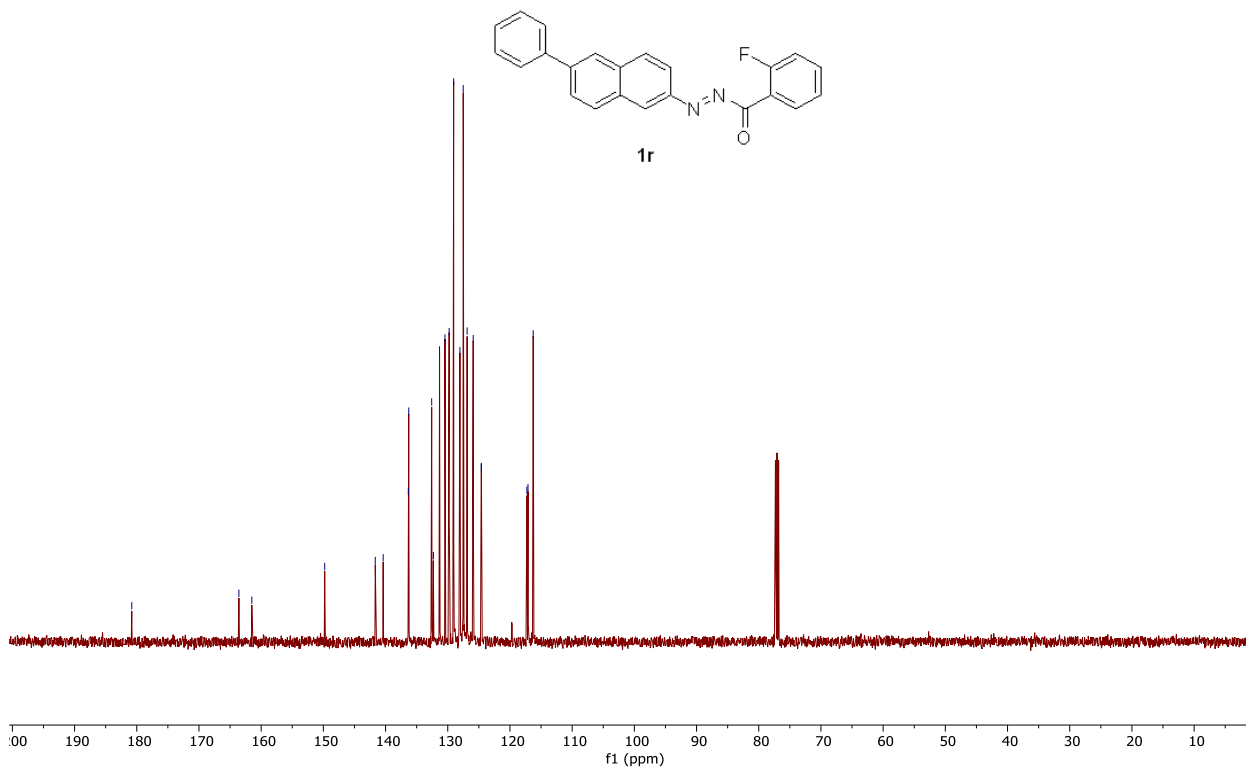

et-b6-6br-az-c13.6.fid  
et-b6-6br-az-c13  
7.81  
7.77  
7.75  
7.60  
7.60  
7.58  
7.58  
7.57  
7.57  
7.56  
7.28  
7.28  
7.26  
7.24  
7.24  
7.18  
7.12  
7.10  
7.10  
7.09  
7.08  
7.07

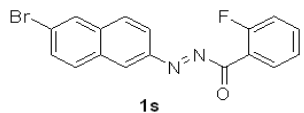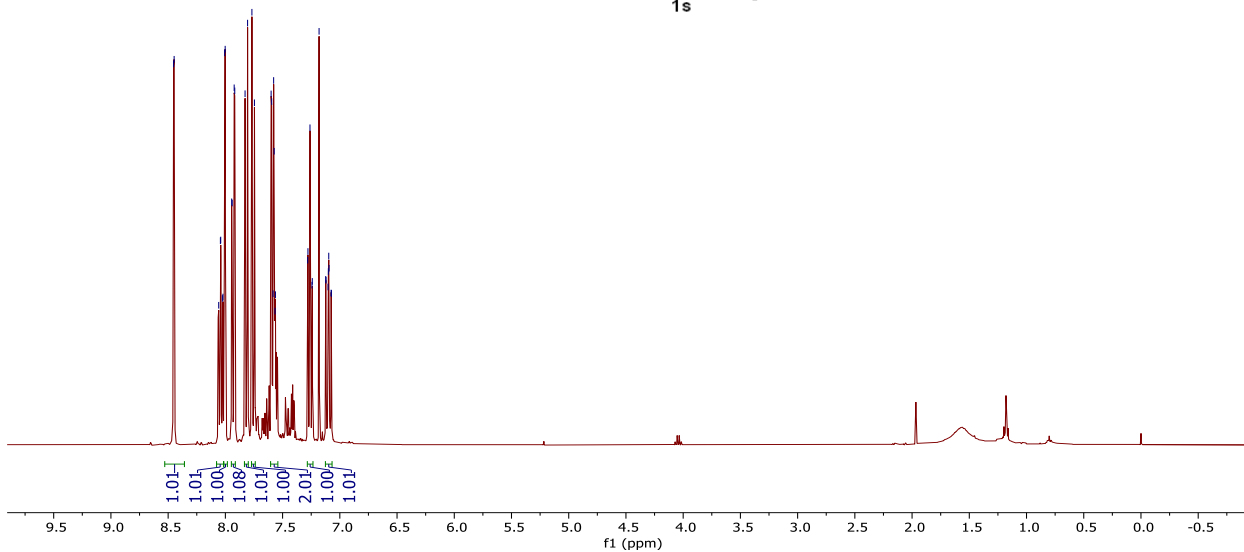

et-b6-6br-az-c13.6.fid  
et-b6-6br-az-c13  
163.6  
161.5  
149.8  
136.7  
136.5  
136.4  
132.5  
131.6  
131.3  
130.8  
130.7  
130.3  
128.6  
124.7  
124.6  
123.2  
117.3  
117.1  
117.1

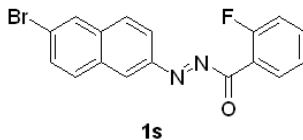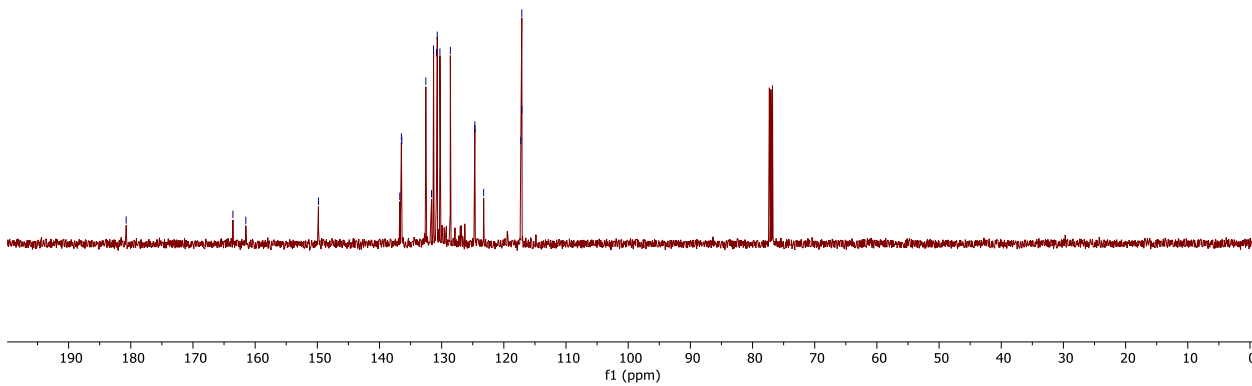



et-b6-6vn-azo.12.fid  
et-b6-6vn-azo

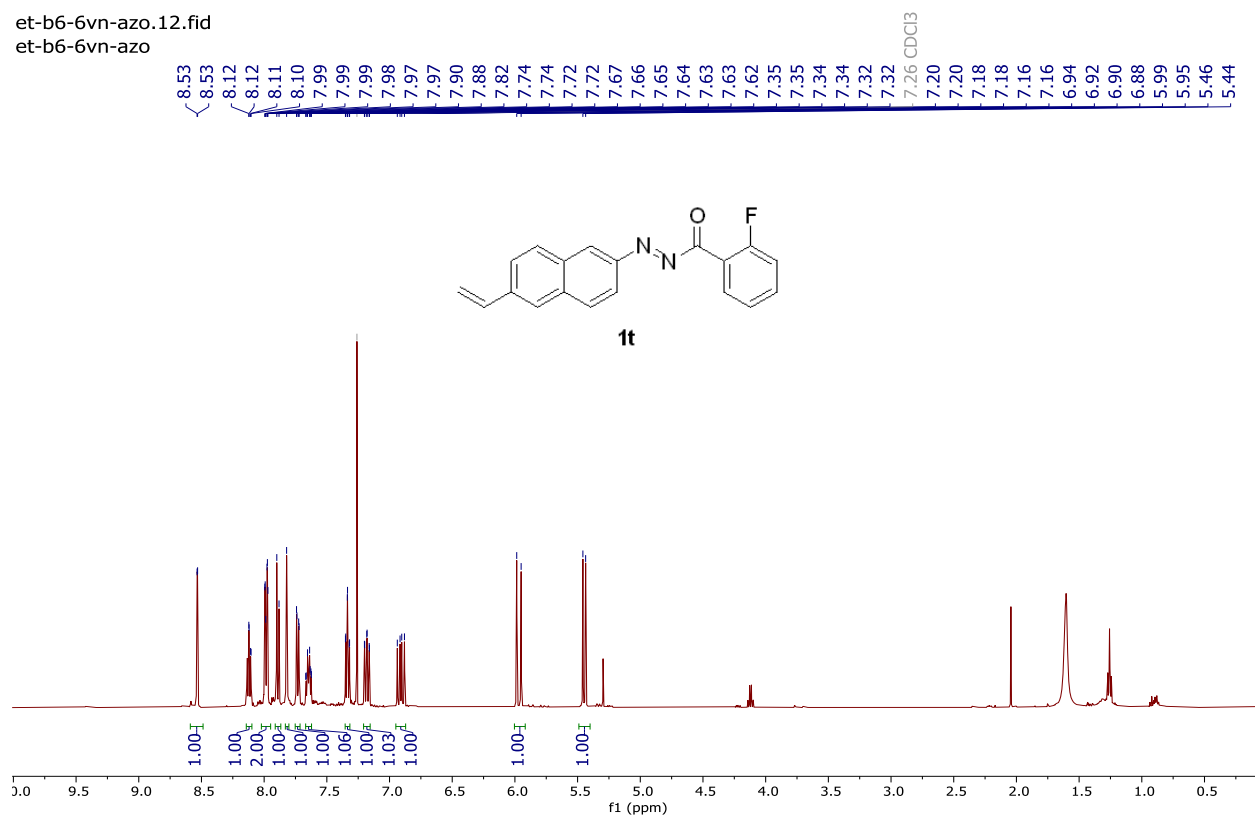

et-b6-6vin-azo-c13-2.79.fid  
13C AVNE 1500

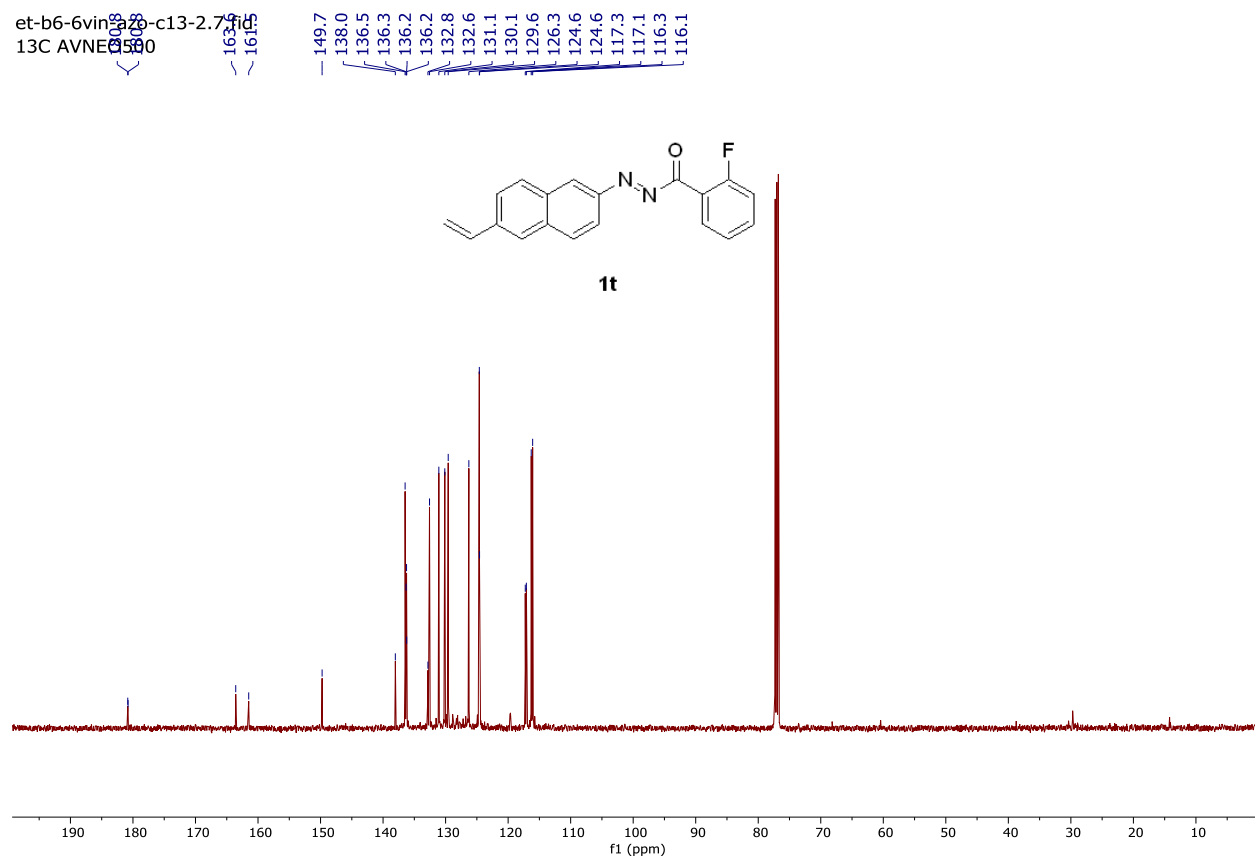

et-b6-sa-azo.12.fid  
et-b6-sa-azo

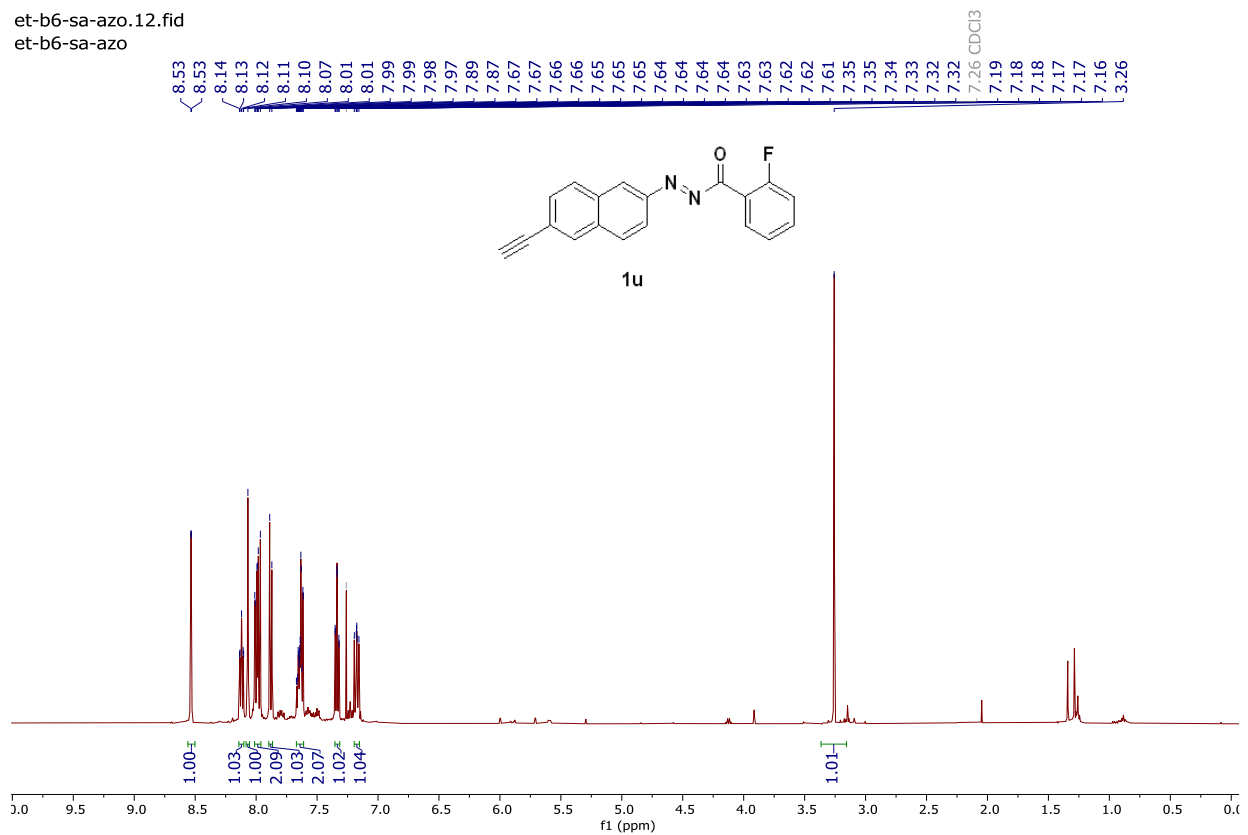

et-b6-6sa-azo-c.7.fid  
et-b6-6sa-azo-c

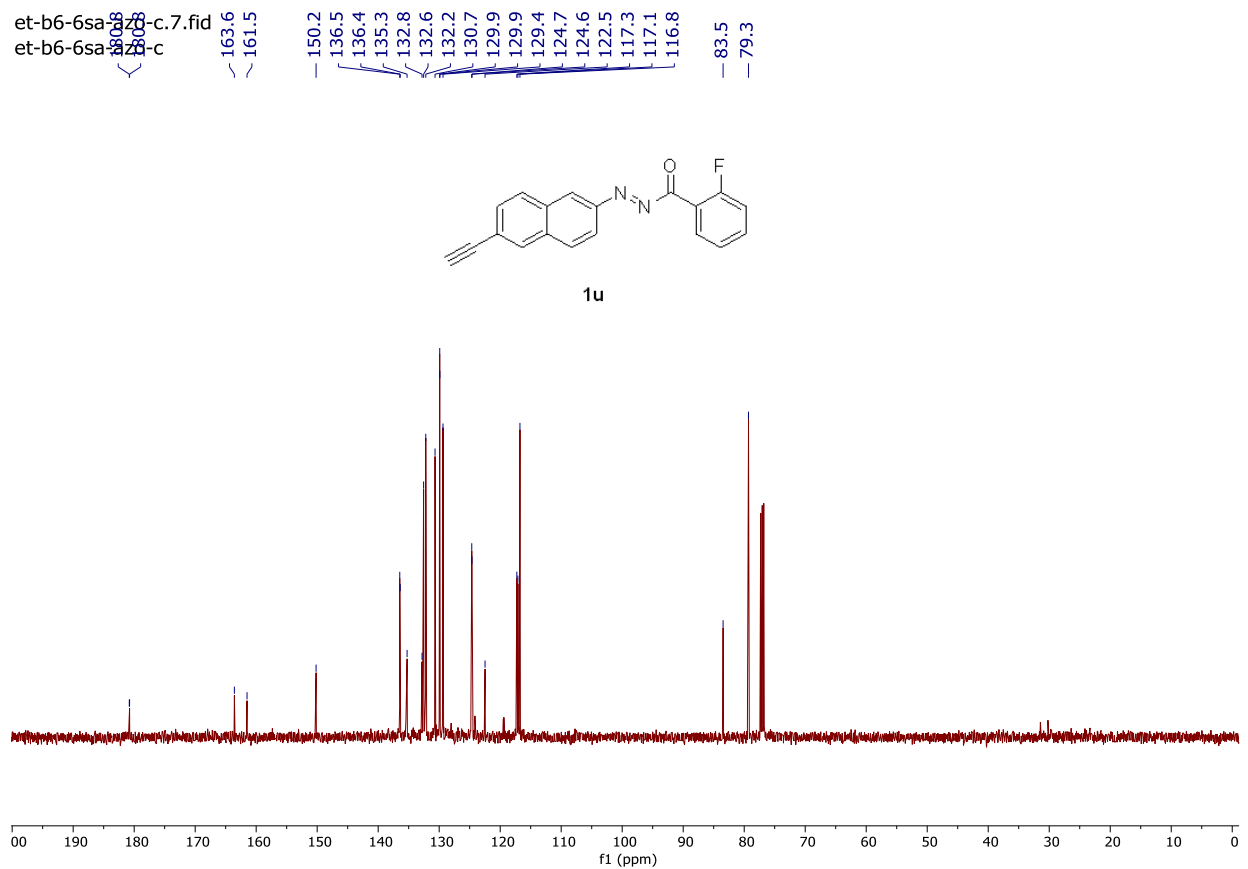

et-b6-r6f-azo.6.fid  
et-b6-r6f-azo

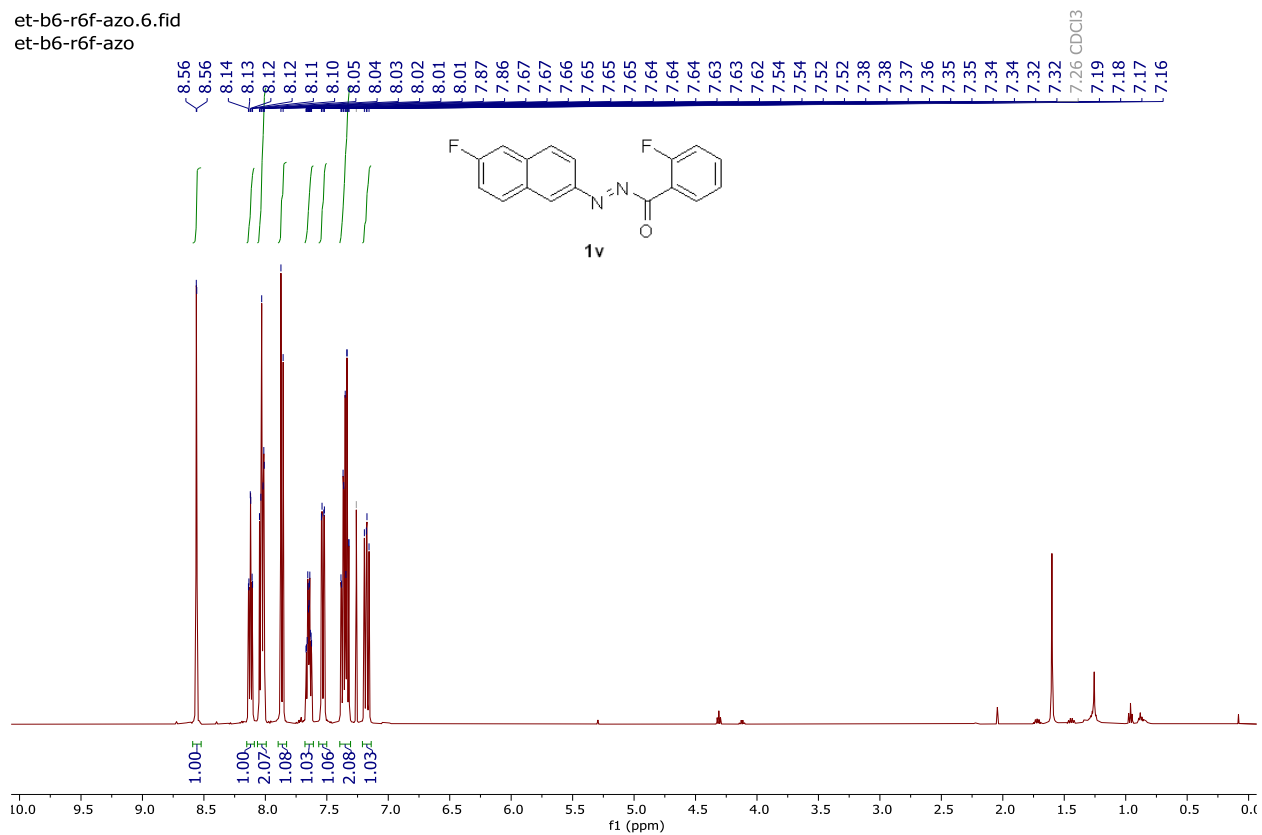

et-b6-r6f-azo.13.6.fid  
et-b6-r6f-azo.13

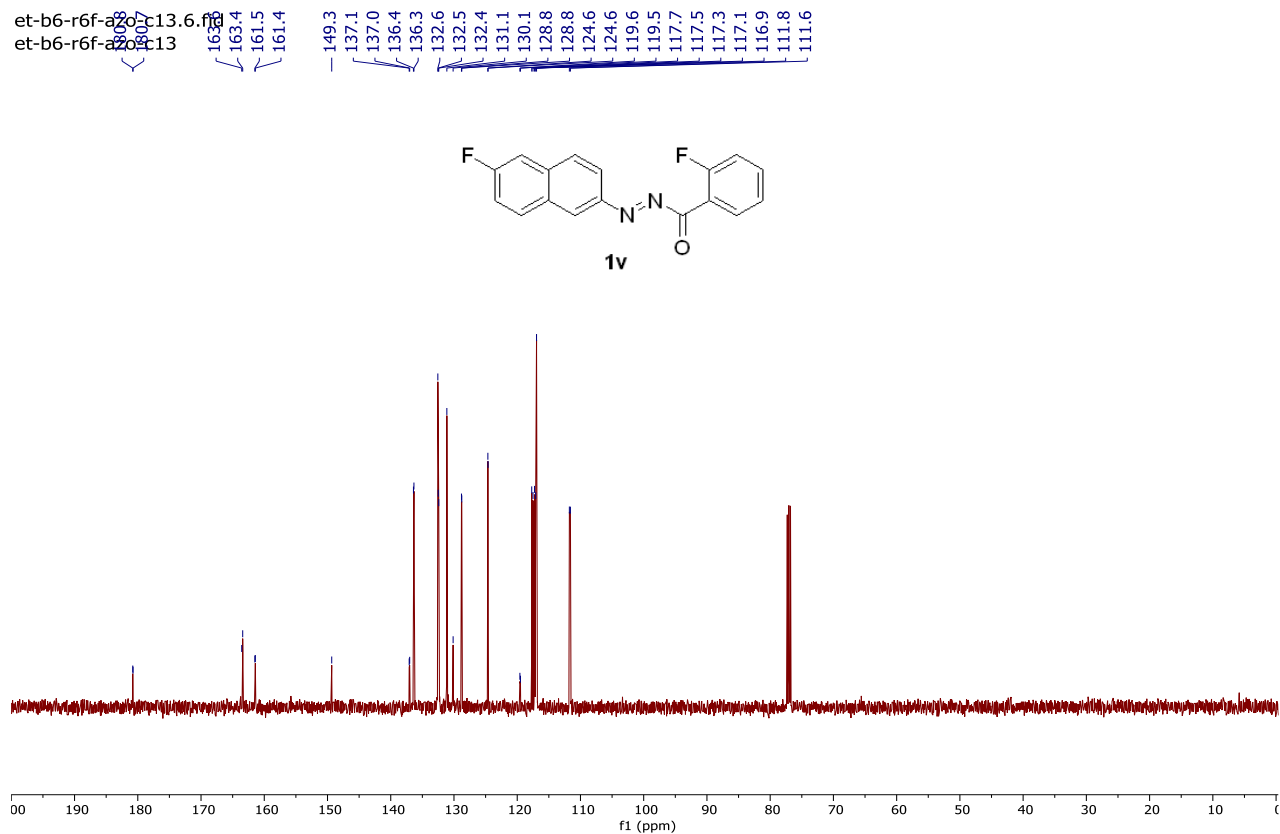

et-b6-4co2me-azo-x-16  
 et-b6-4co2me-azo-x-16

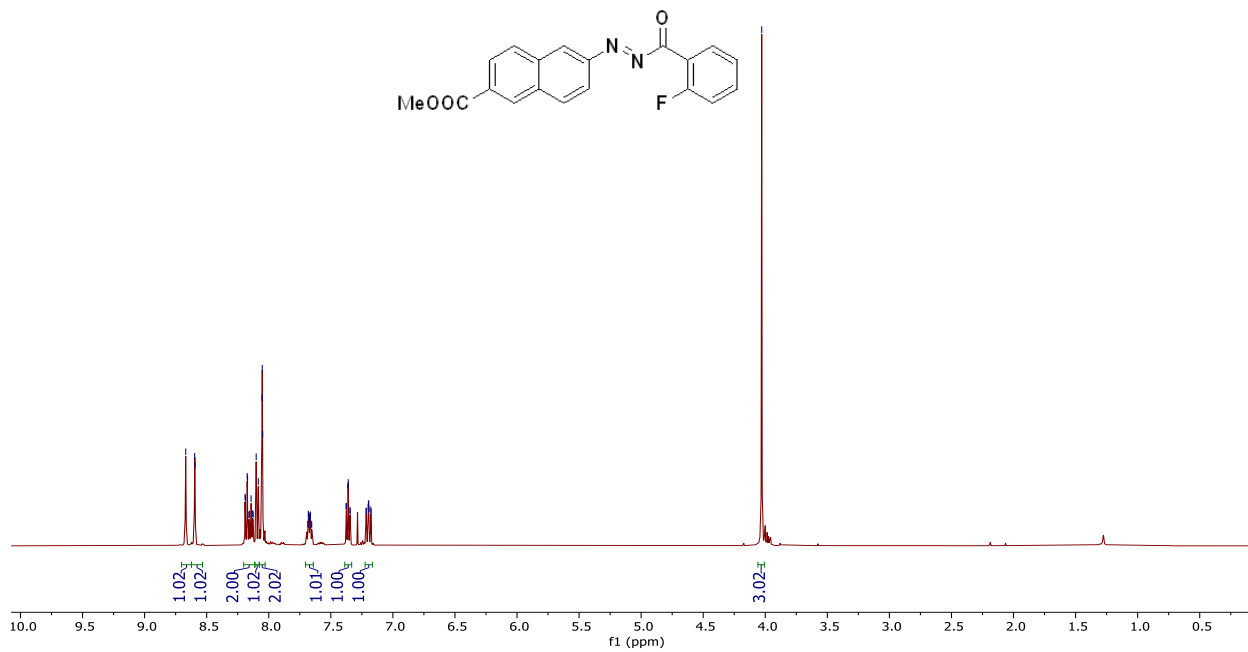

et-b6-4co2me-azo-x-16.fid  
 et-b6-4co2me-azo-x-16

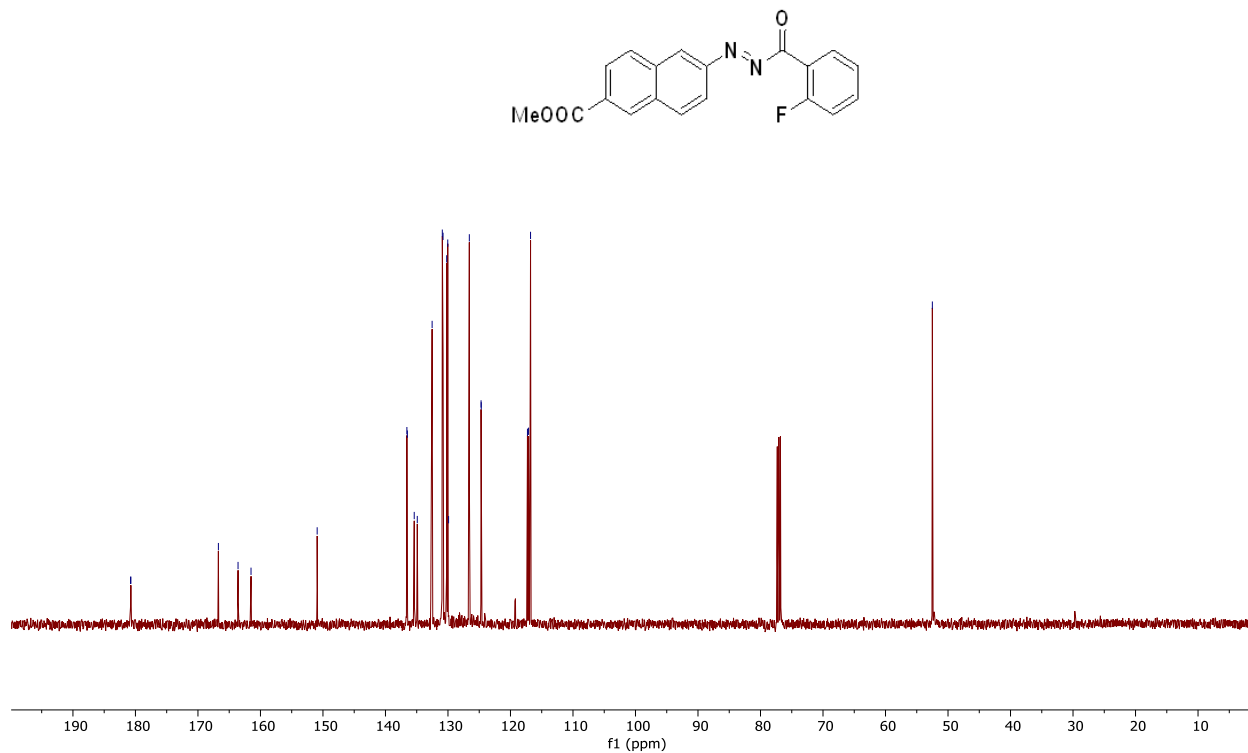

Sep15-2023-et-b6-7me-azo.10.fid

Sep15-2023-et-b6-7me-azo

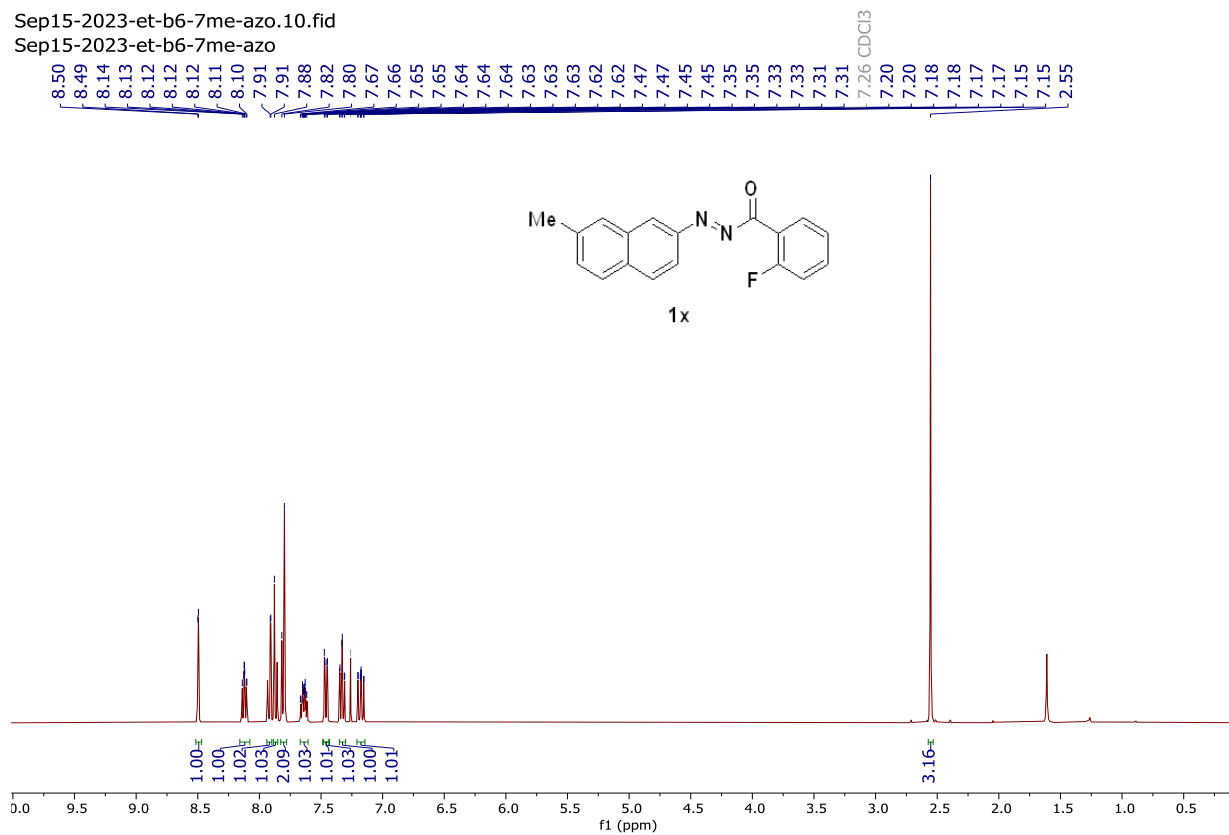

et-7me-aa-azo-c13.6.fid

et-7me-aa-azo-c13

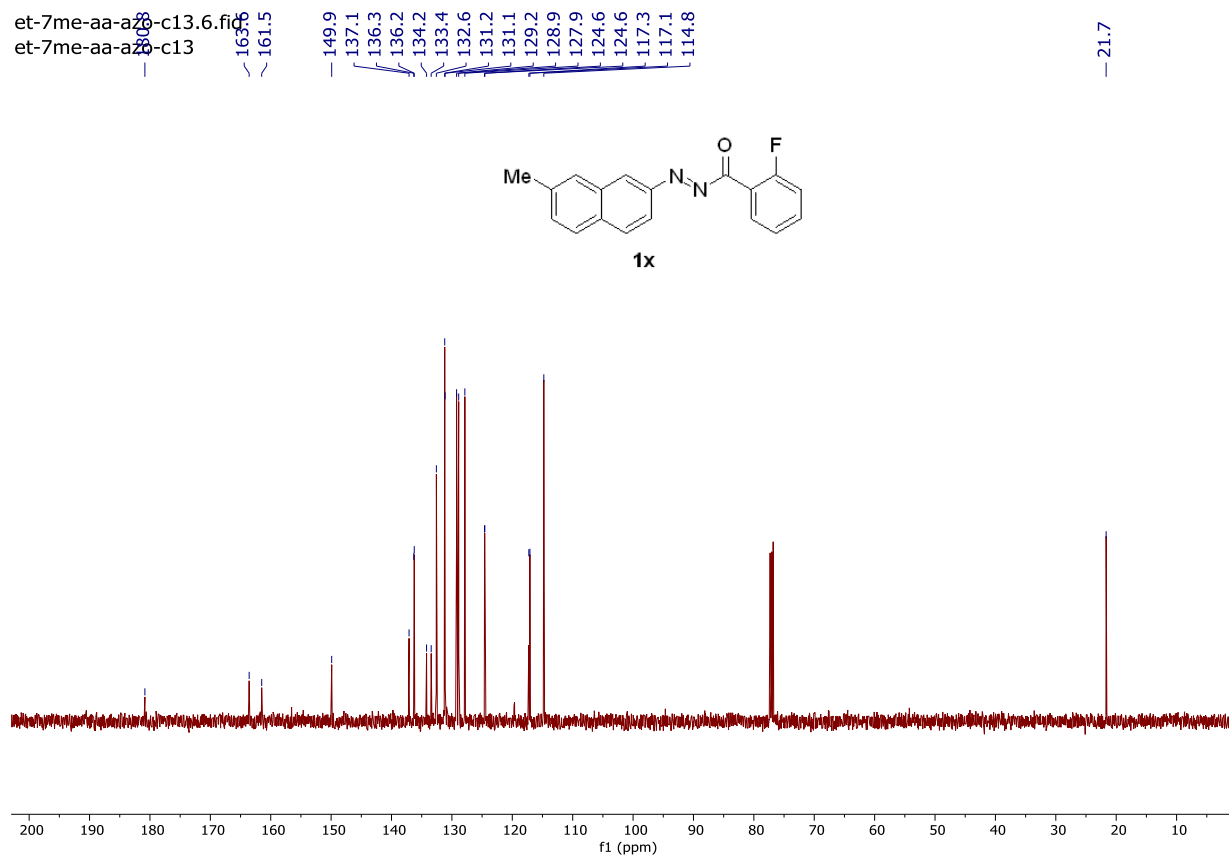

Sep 15 2023 et-b6-7ph-az-c13.6.13  
 Sep 15 2023 et-b6-7ph-az

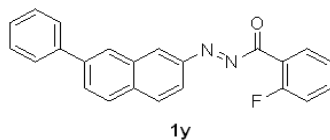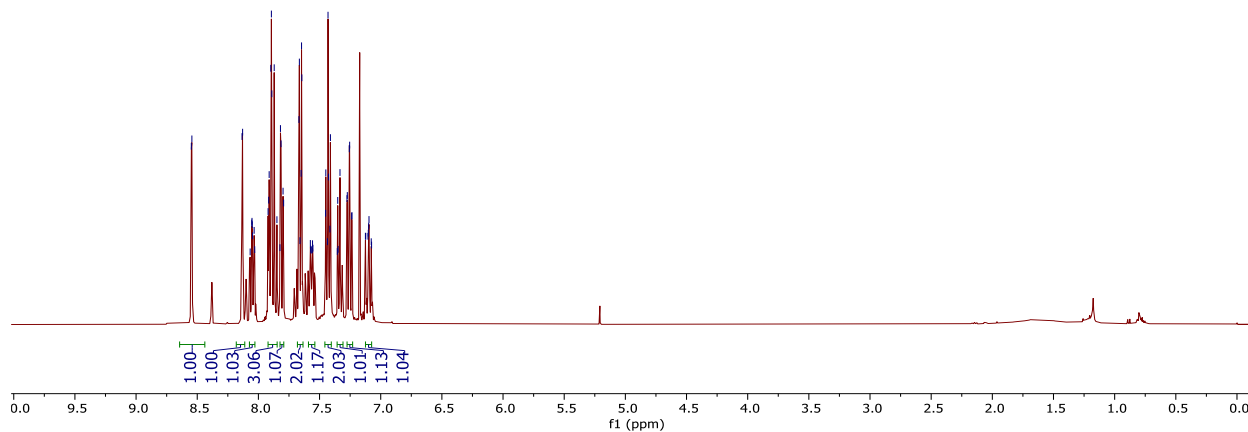

et-b6-7ph-azo-c13.6.13  
 et-b6-7ph-azo-c13

150.1  
 140.3  
 140.0  
 136.4  
 136.3  
 135.0  
 133.5  
 132.6  
 132.1  
 131.7  
 129.8  
 129.7  
 129.5  
 129.3  
 129.0  
 128.6  
 127.9  
 127.6  
 127.5  
 124.6  
 124.6  
 117.3  
 117.1  
 116.4  
 115.8

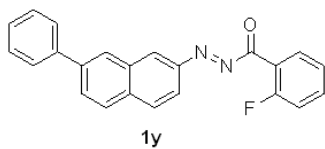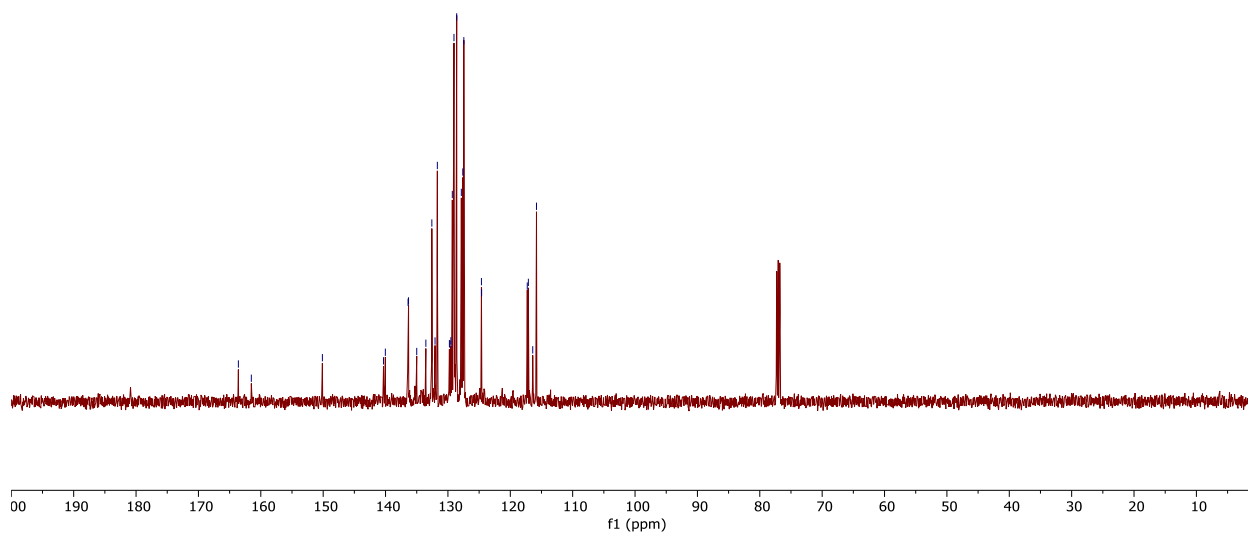

Dec25-2023-et-b6-7br-a2o-c13.6  
Dec25-2023-et-b6-7br-a2o-c13

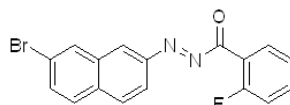

1z

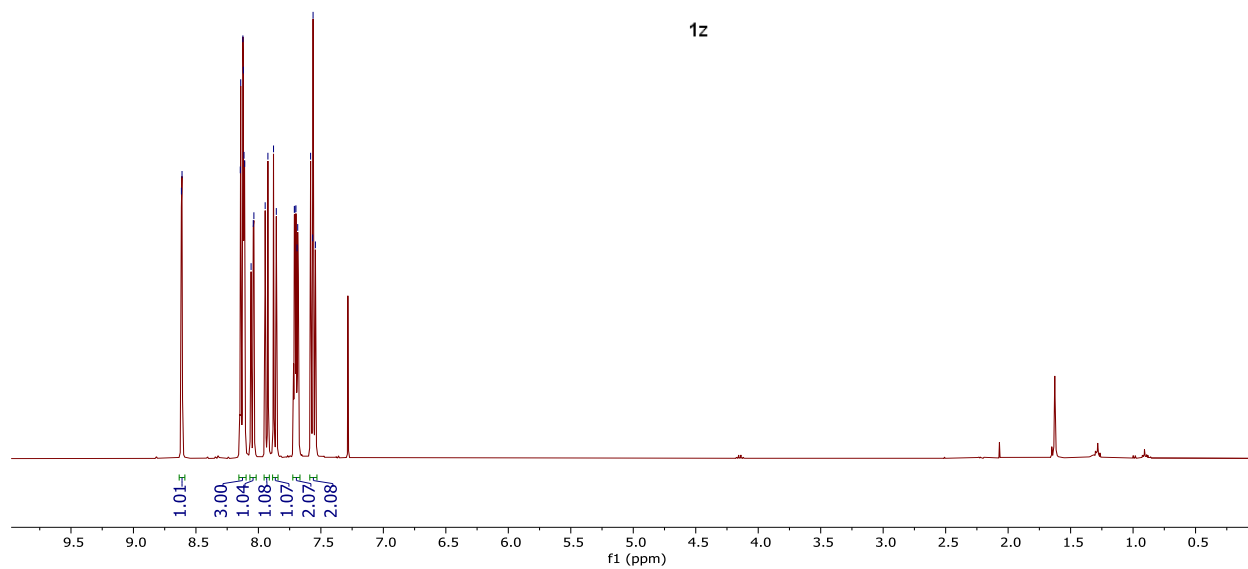

et-b6-7br-a2o-c13.6  
et-b6-7br-a2o-c13

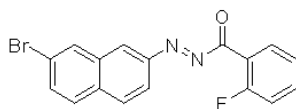

1z

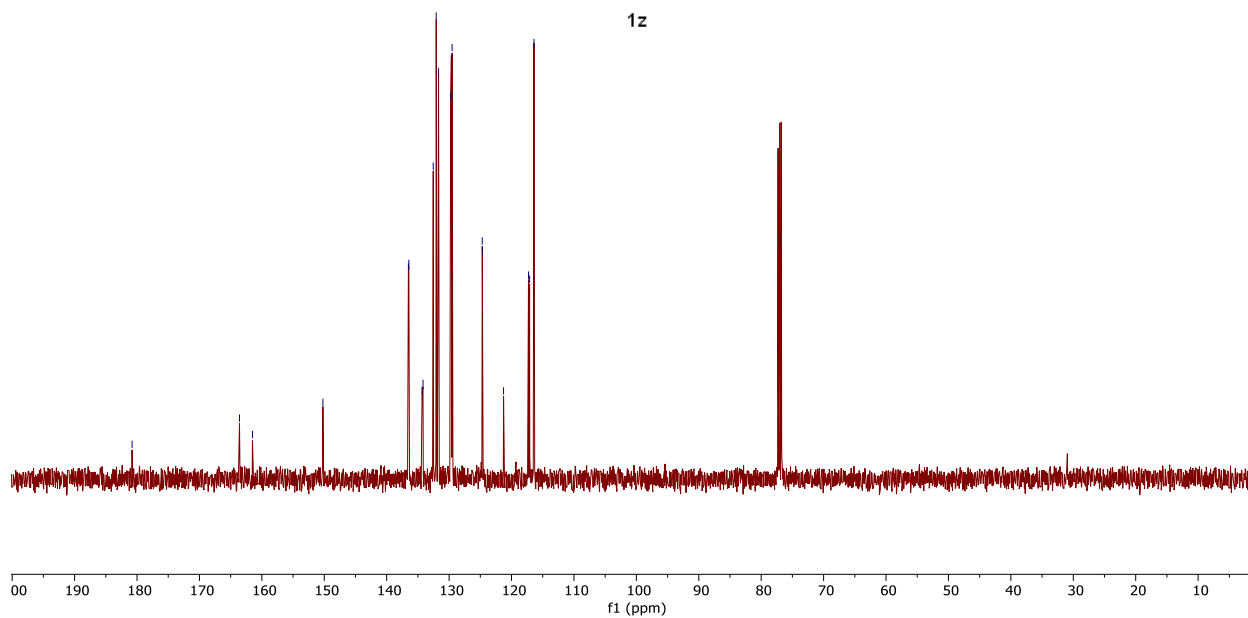

et-b6-anc-az.7.fid  
et-b6-anc-az

8.80  
8.65  
8.47  
8.17  
8.16  
8.15  
8.14  
8.14  
8.13  
8.13  
8.08  
8.07  
8.06  
8.04  
7.98  
7.97  
7.96  
7.95  
7.68  
7.67  
7.67  
7.66  
7.66  
7.65  
7.65  
7.64  
7.64  
7.63  
7.63  
7.60  
7.60  
7.59  
7.59  
7.58  
7.58  
7.57  
7.57  
7.56  
7.55  
7.55  
7.55  
7.54  
7.54  
7.36  
7.35  
7.33  
7.26  
7.26 CDCl3  
7.21  
7.20  
7.20  
7.19  
7.18

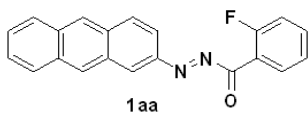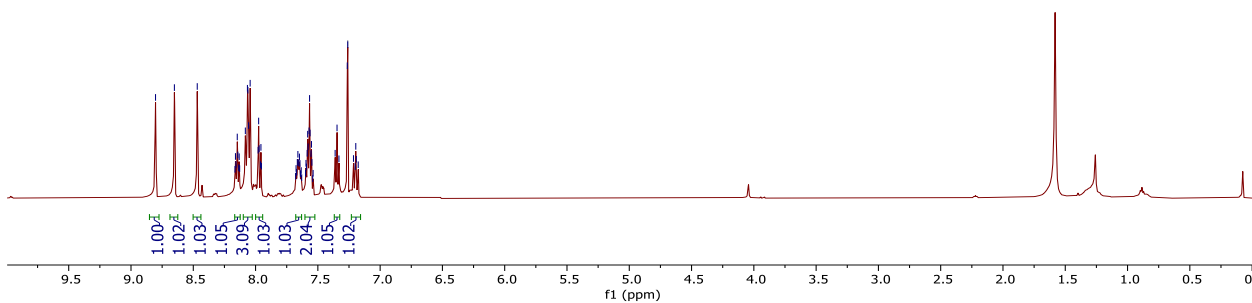

et-b6-anc-az.c13.6.fid  
et-b6-anc-az.c13

163.6  
161.5  
149.6  
136.3  
136.2  
135.3  
133.5  
132.8  
132.6  
132.3  
130.9  
130.1  
129.7  
128.6  
128.3  
128.2  
127.1  
126.8  
126.4  
125.3  
124.6  
124.6  
117.3  
117.1  
114.7

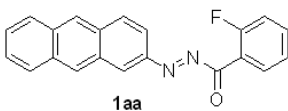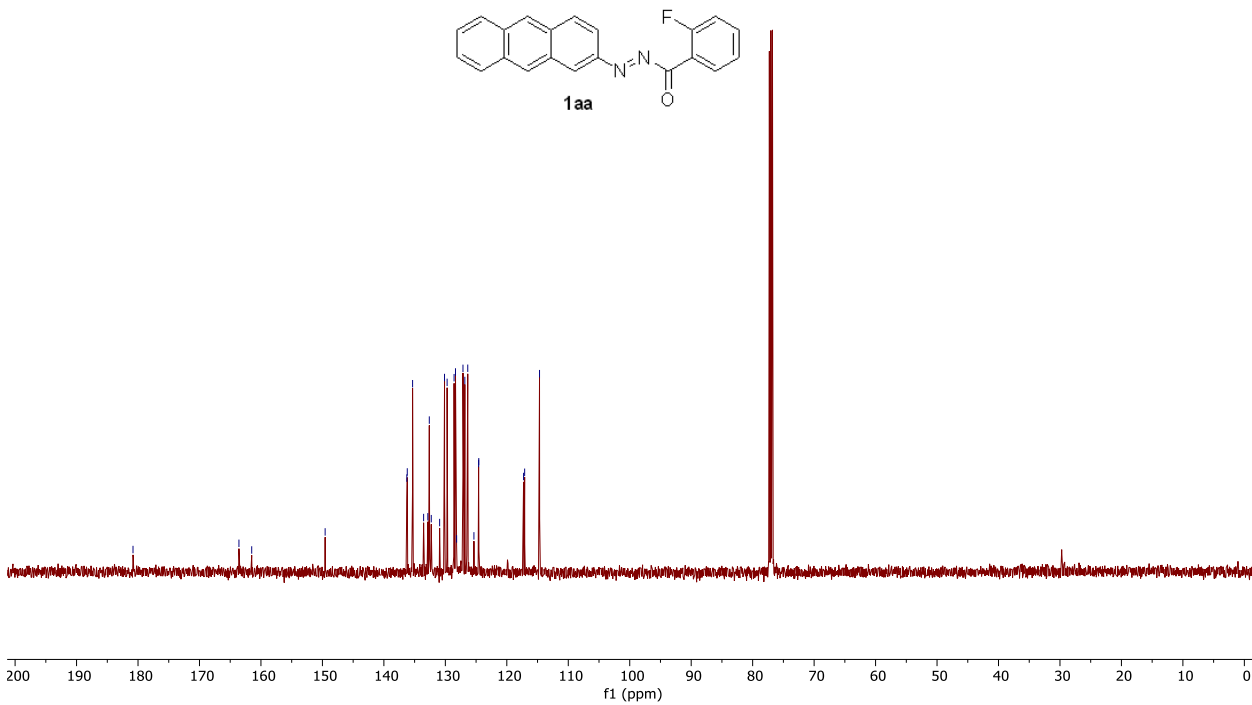



et-b6-bz-bnm-13.6.fid  
et-b6-bz-bnm-13.6

7.97  
7.95  
7.89  
7.87  
7.80  
7.78  
7.58  
7.56  
7.55  
7.53  
7.47  
7.45  
7.44  
7.43  
7.29  
7.28  
7.26  
7.20  
7.19  
7.17  
6.80  
6.79

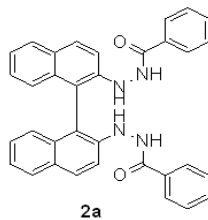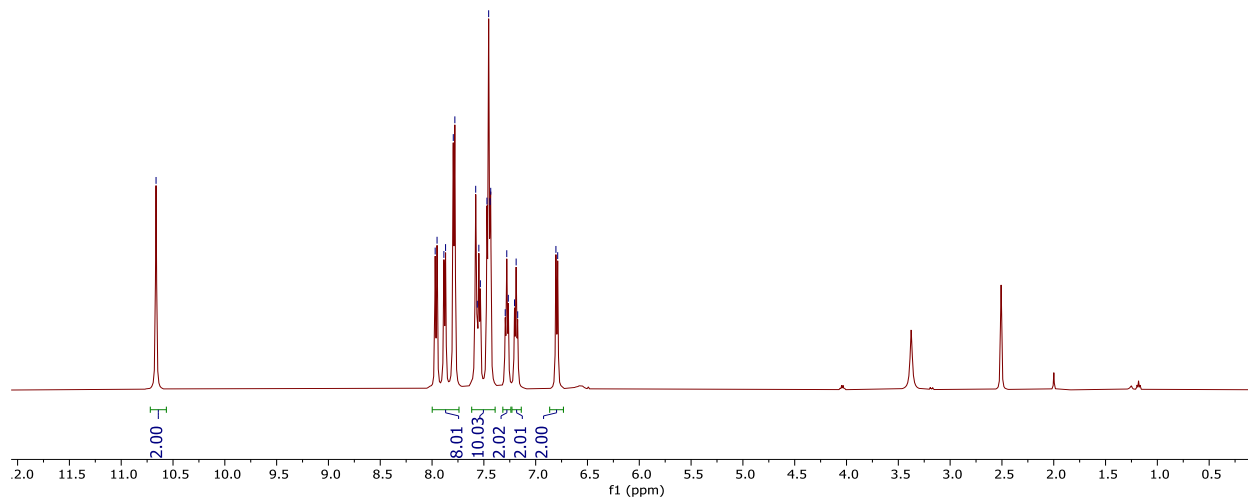

et-b6-bz-bnm-c13.6.fid  
et-b6-bz-bnm-c13

145.1  
134.0  
133.2  
132.3  
130.1  
129.2  
128.9  
128.6  
127.7  
127.0  
124.5  
123.3  
115.5  
112.2

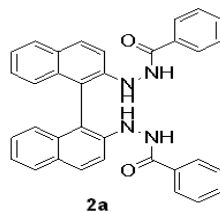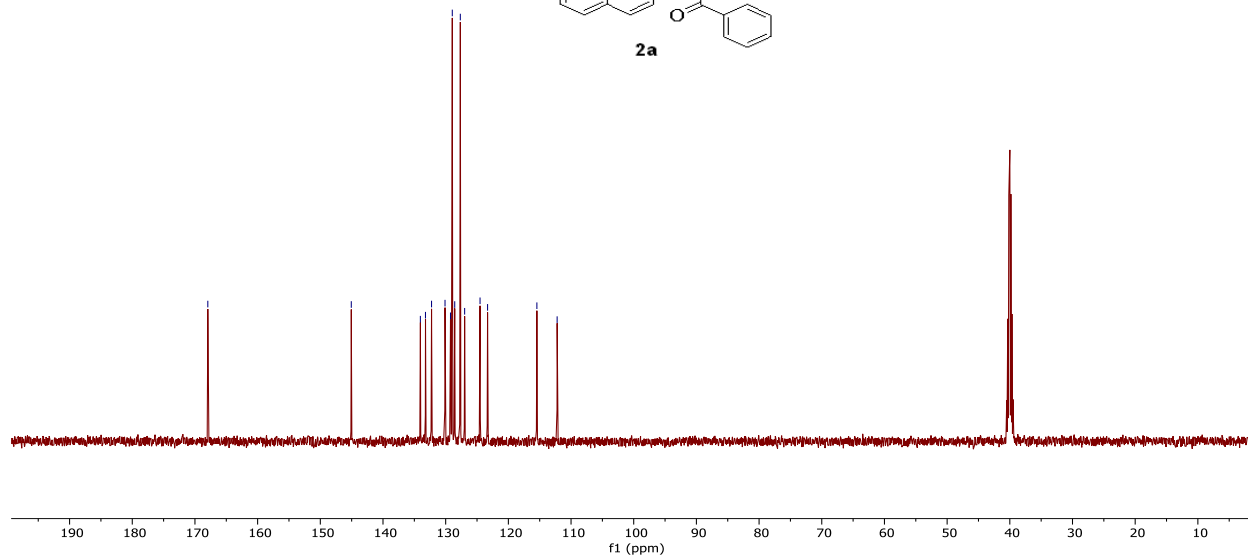

May18-2023-et-b6-8a-4br.10.fid  
May18-2023-et-b6-8a-4br

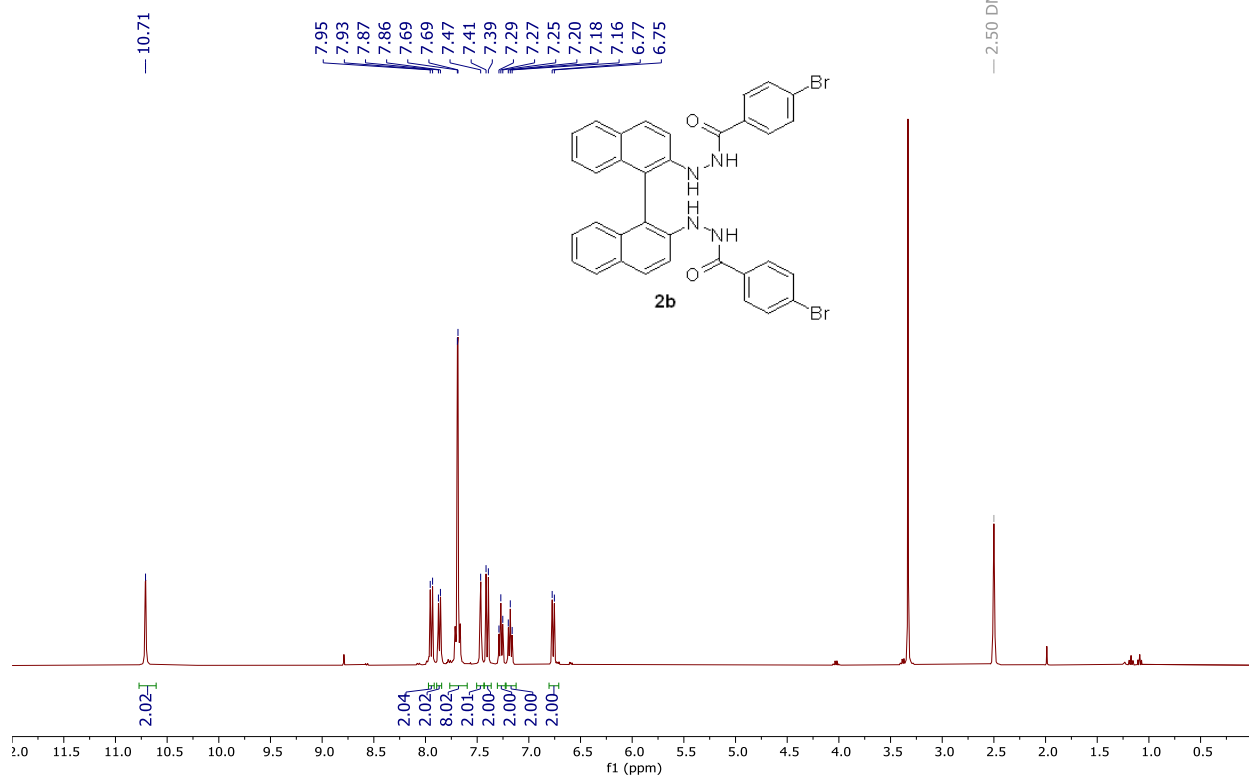

et-b6-8a-4br.8.fid  
et-b6-8a-4br

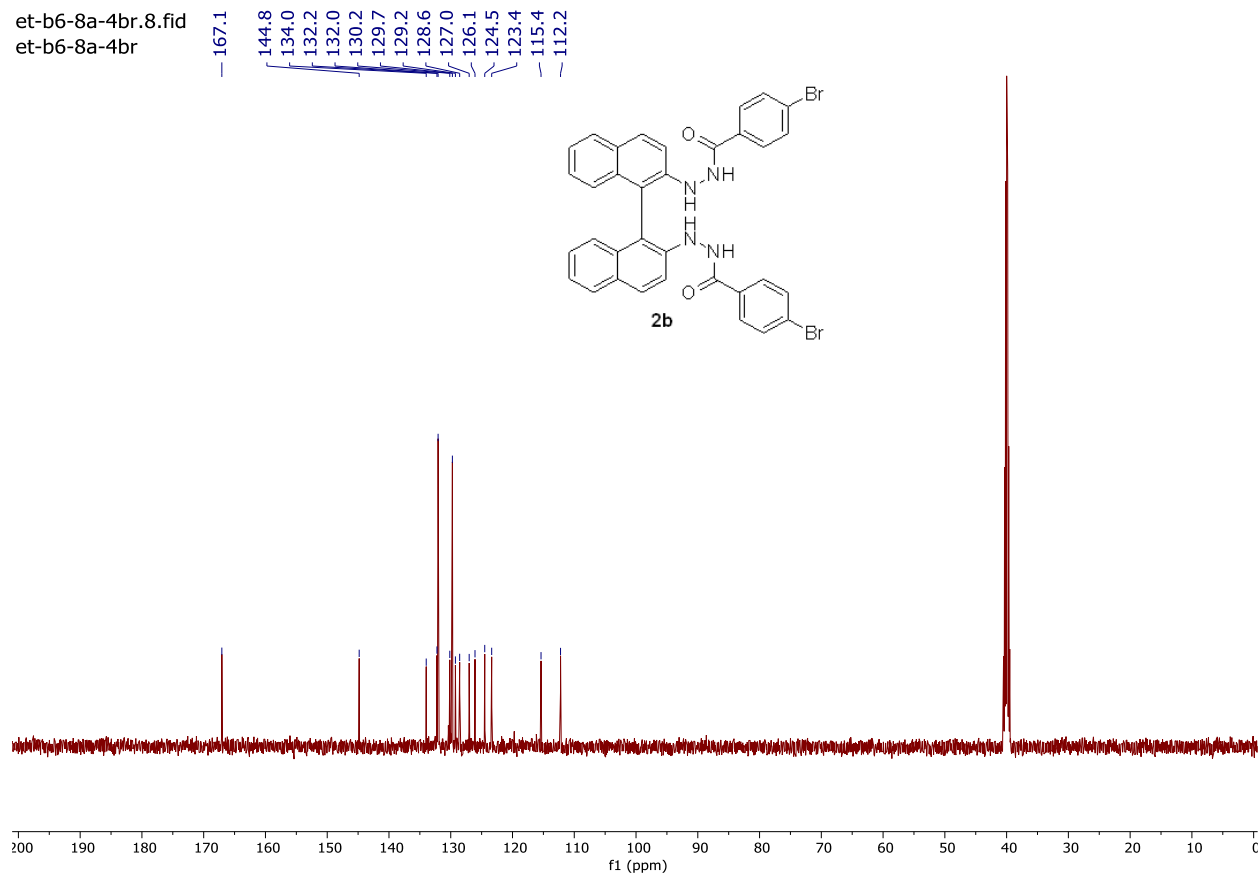

May18-2023-et-b6-5-4cl.12.fid  
May18-2023-et-b6-5-4cl

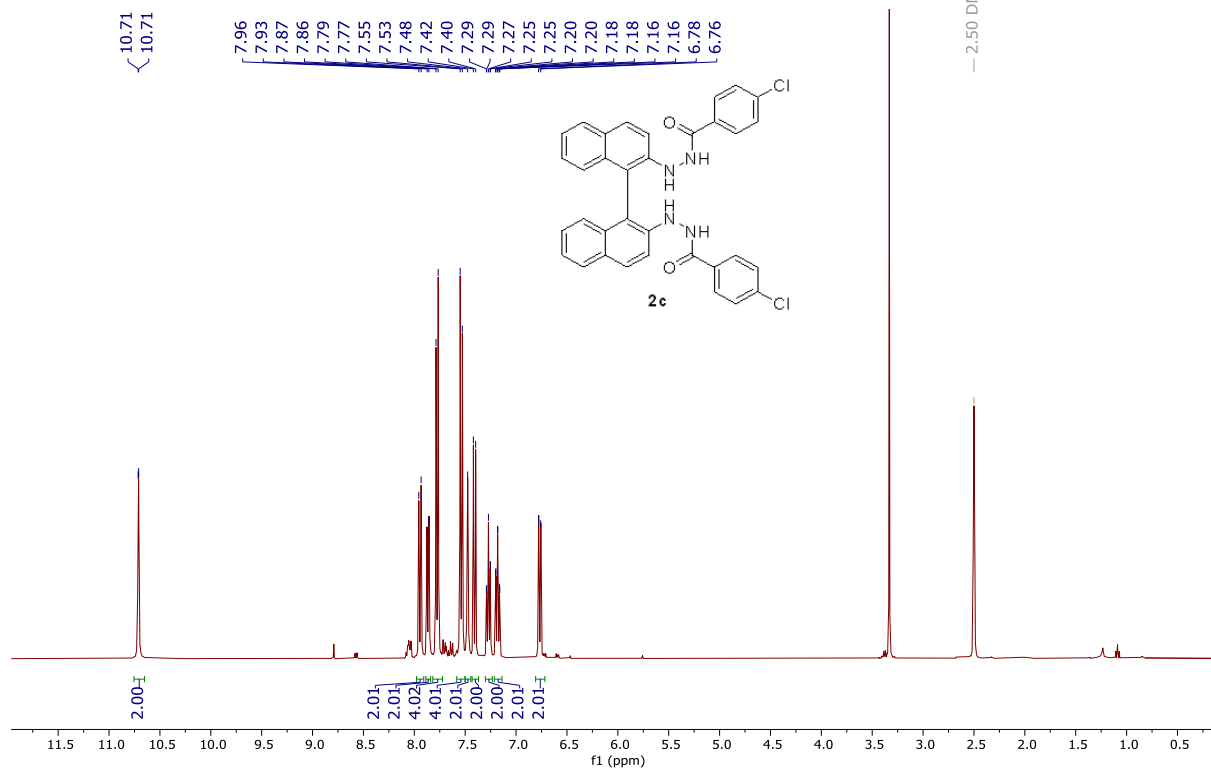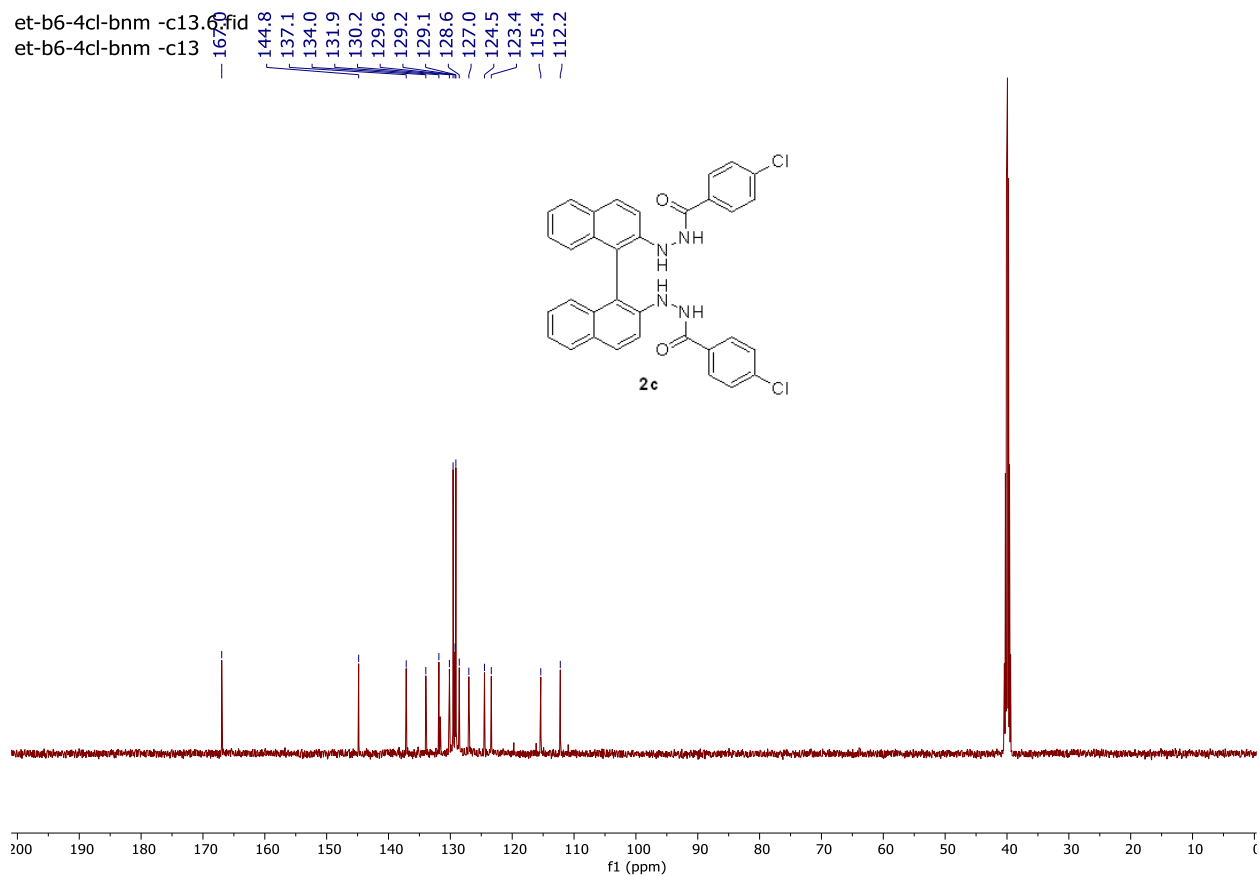

Nov07-2023-et-b6-4f.10.fid  
Nov07-2023-et-b6-4f

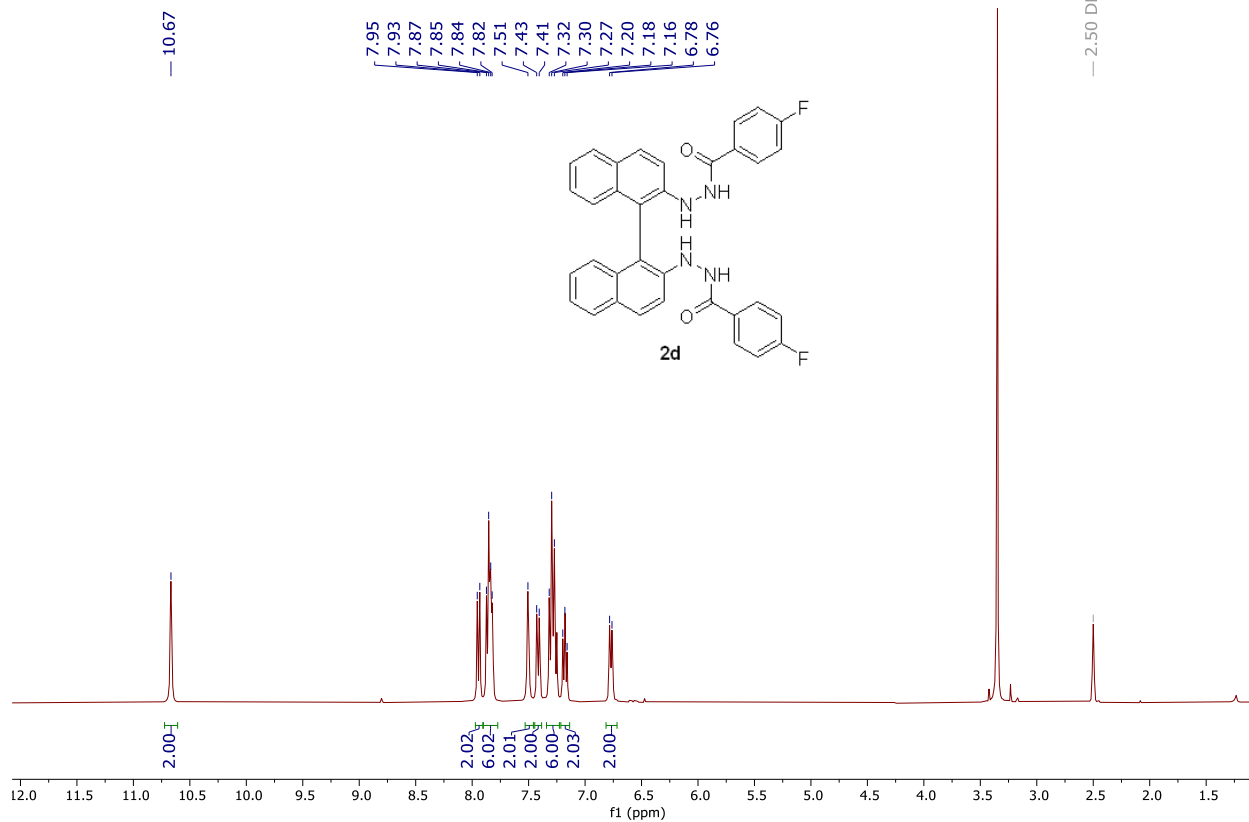

Nov07-2023-et-b6-4f  
Nov07-2023-et-b6-4f

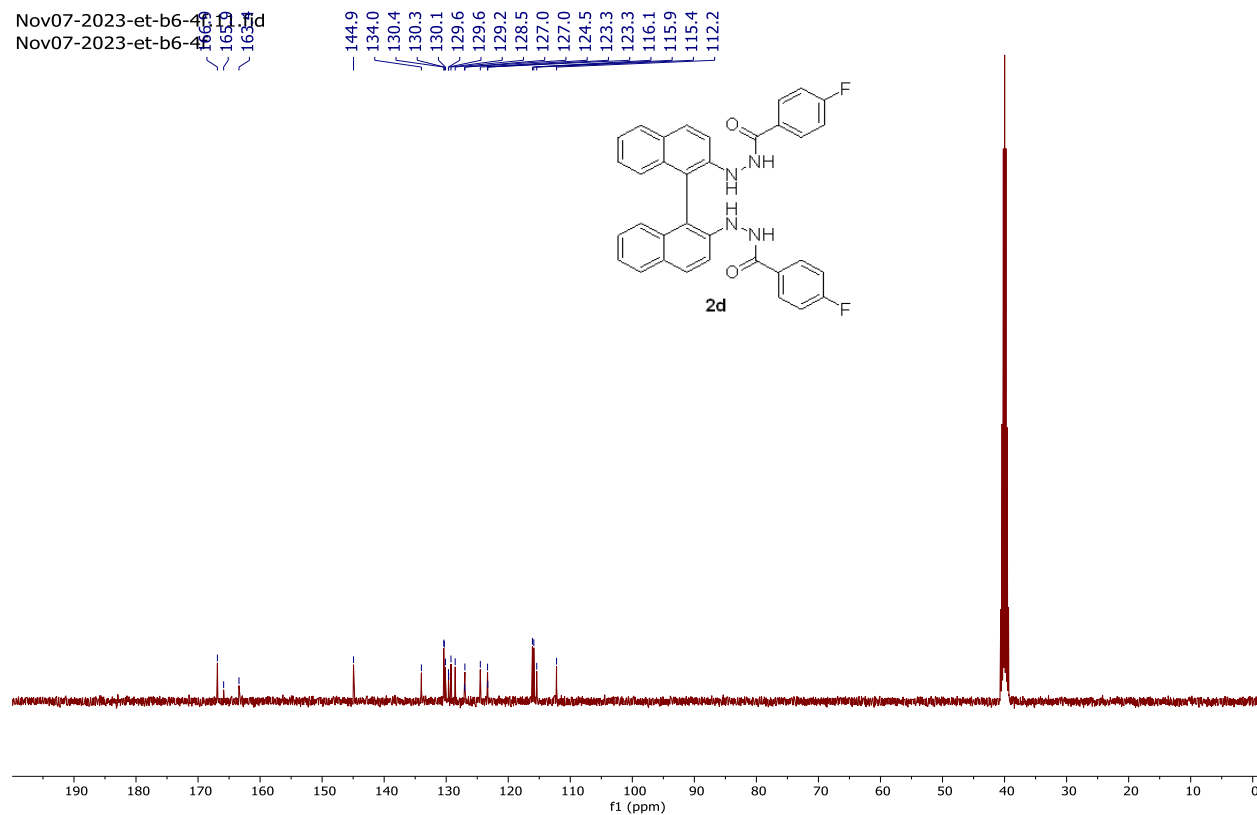

et-b6-4-me-bnm.7.fid  
et-b6-4-me-bnm

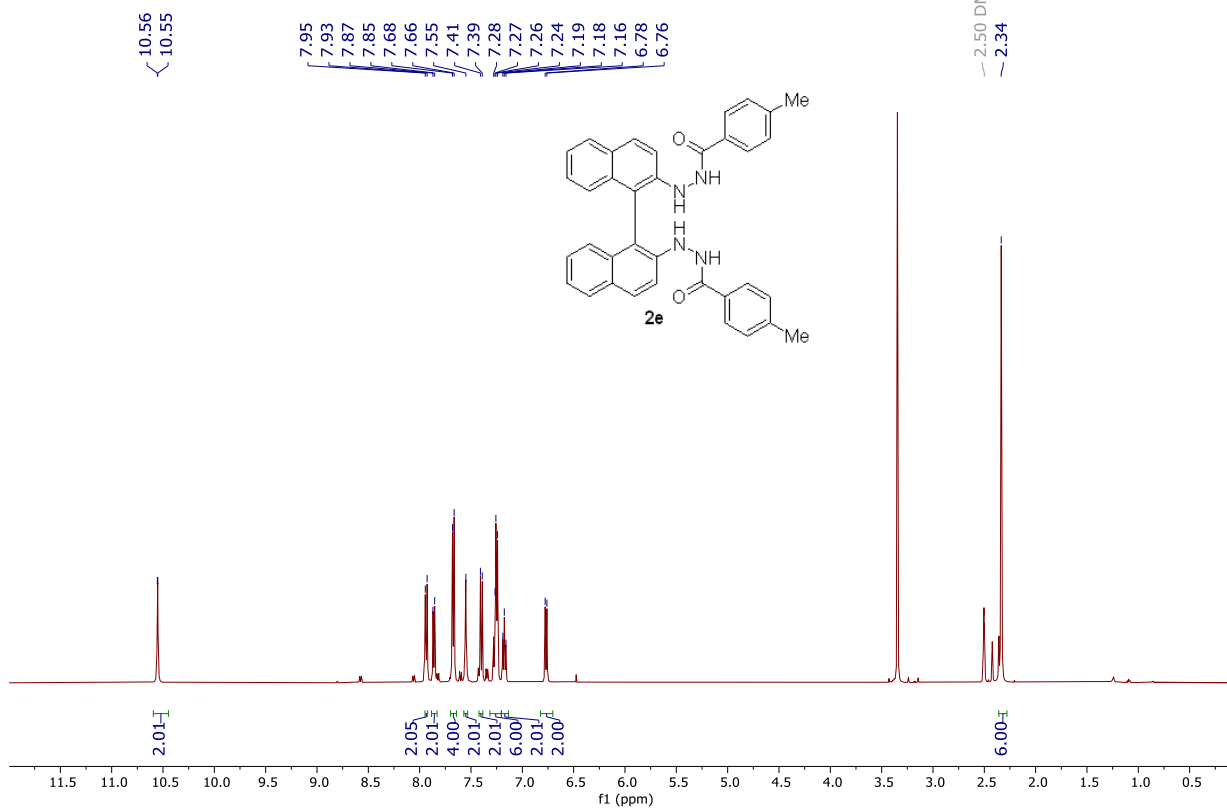

et-b6-4me-bnm-c136.fid  
et-b6-4me-bnm-c136

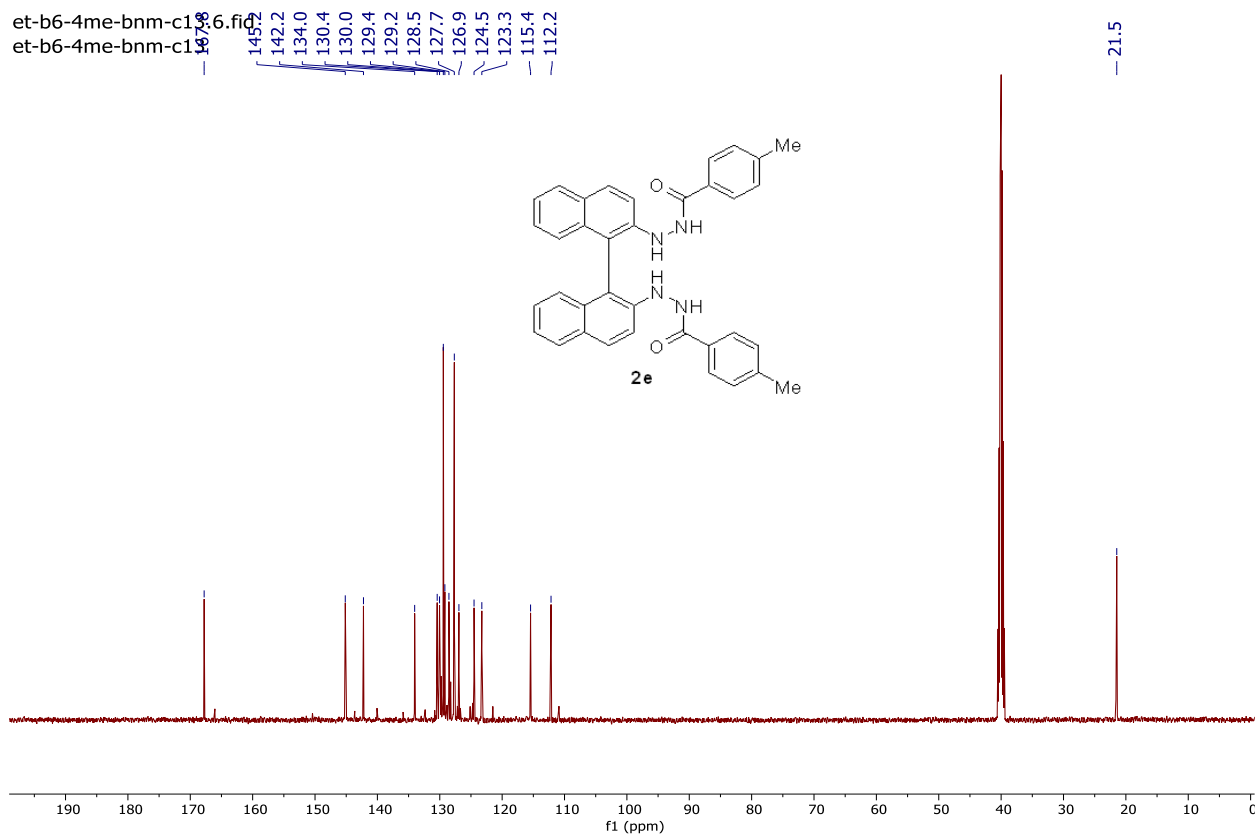

May18-2023-et-b6-7-3br.10.fid  
May18-2023-et-b6-7-3br

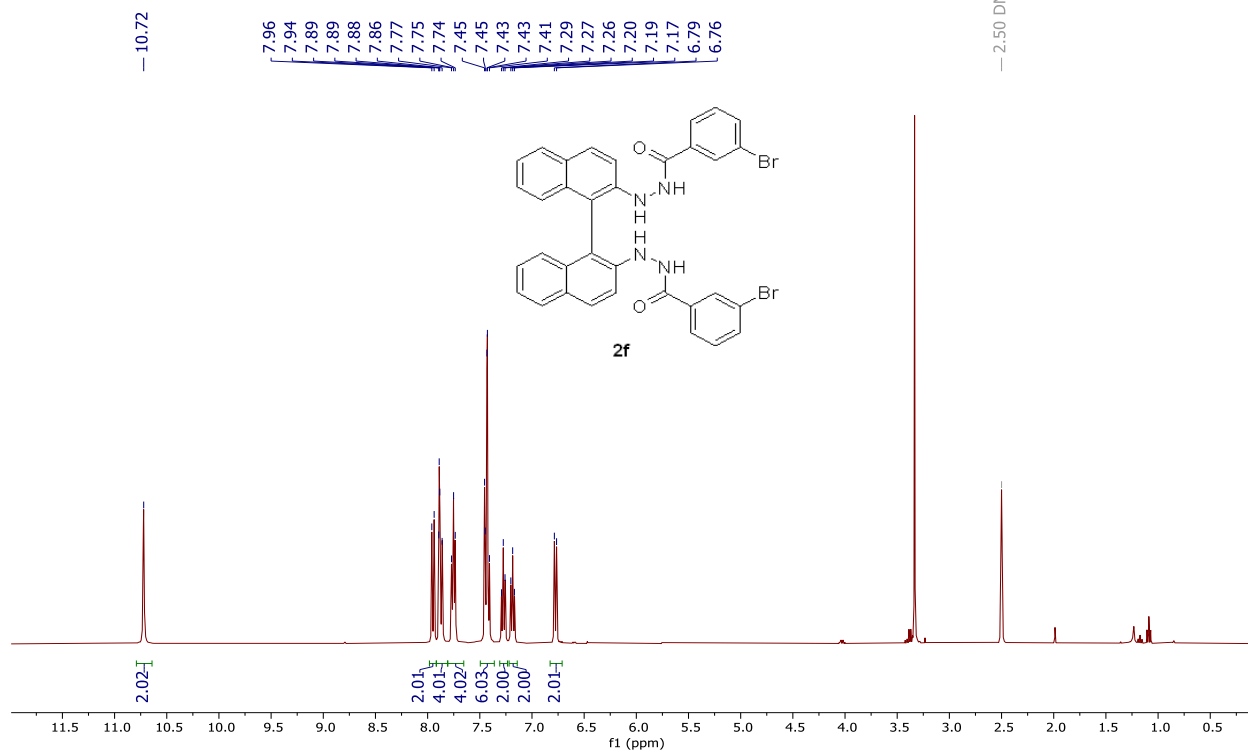

et-b6-7a-3br.8.fid  
et-b6-7a-3br

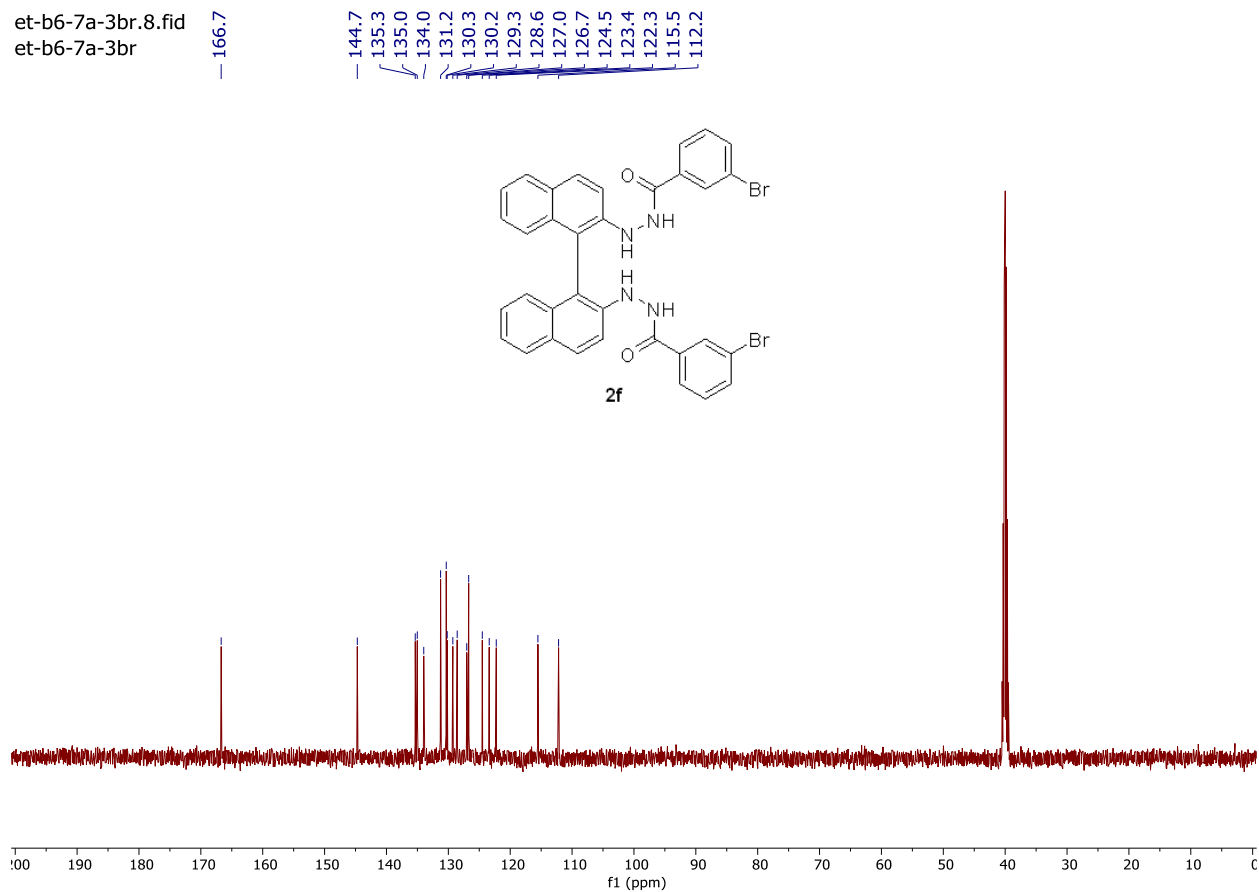

May18-2023-et-b6-11b-3me.10.fid  
May18-2023-et-b6-11b-3me

7.96  
7.94  
7.88  
7.86  
7.55  
7.44  
7.41  
7.36  
7.34  
7.28  
7.26  
7.18  
6.79  
6.77

-2.31

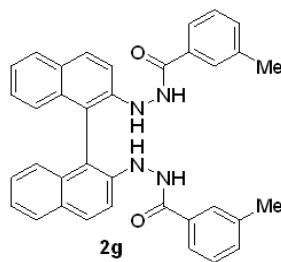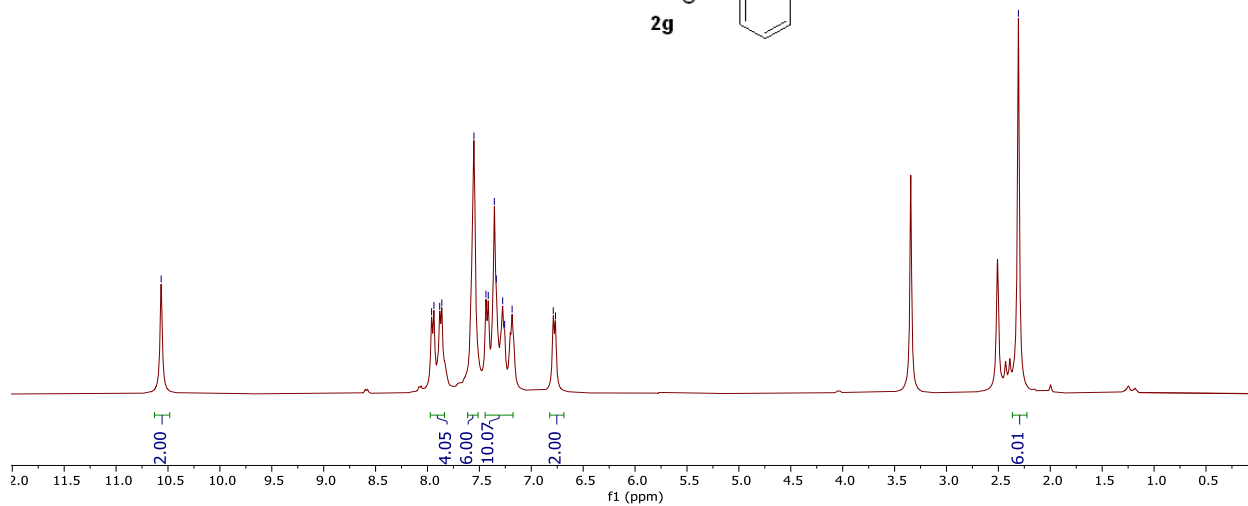

et-b6-3me-bnm-cl  
et-b6-3me-bnm-cl

145.1  
138.8  
134.0  
133.3  
132.8  
130.1  
129.2  
128.8  
128.5  
128.2  
126.9  
124.7  
124.5  
123.3  
115.5  
112.1

-21.3

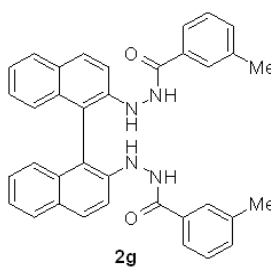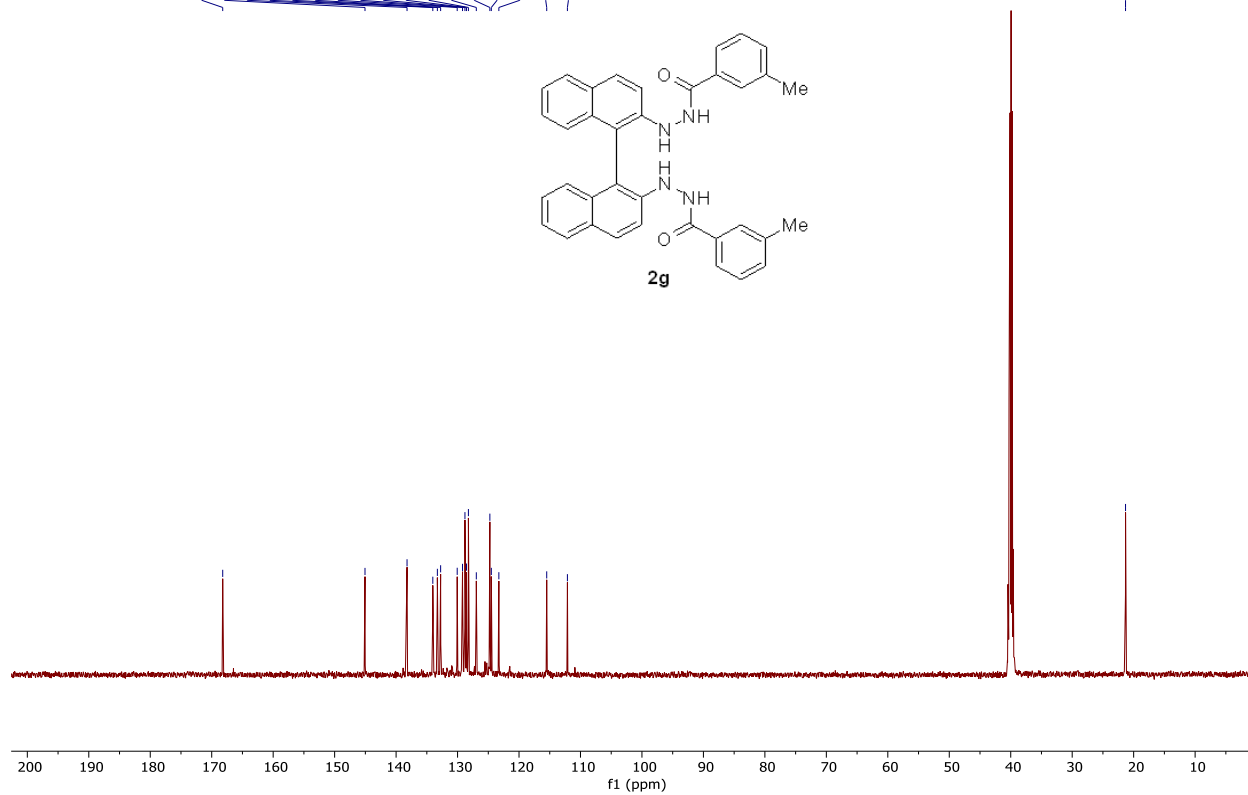

May18-2023-et-b6-6-2cl.10.fid  
May18-2023-et-b6-6-2cl

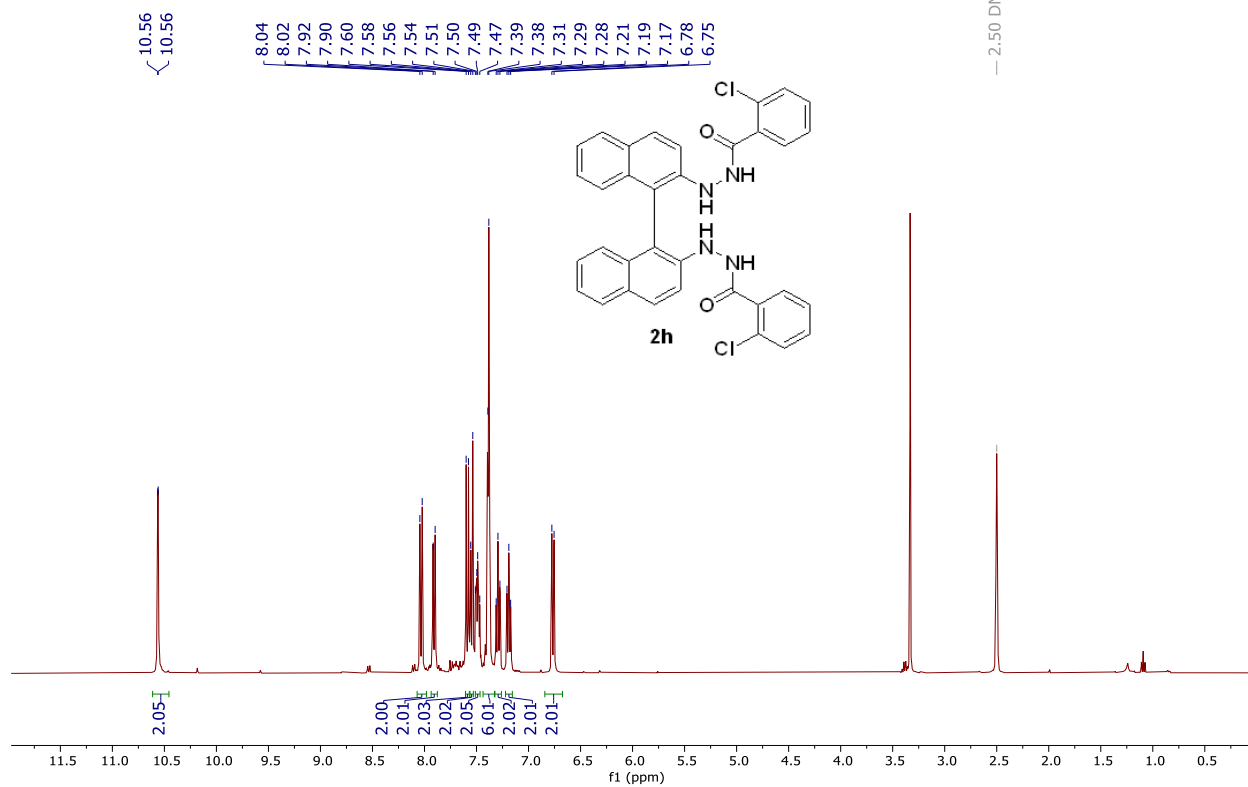

et-b6-6-2cl.8.fid  
et-b6-6-2cl

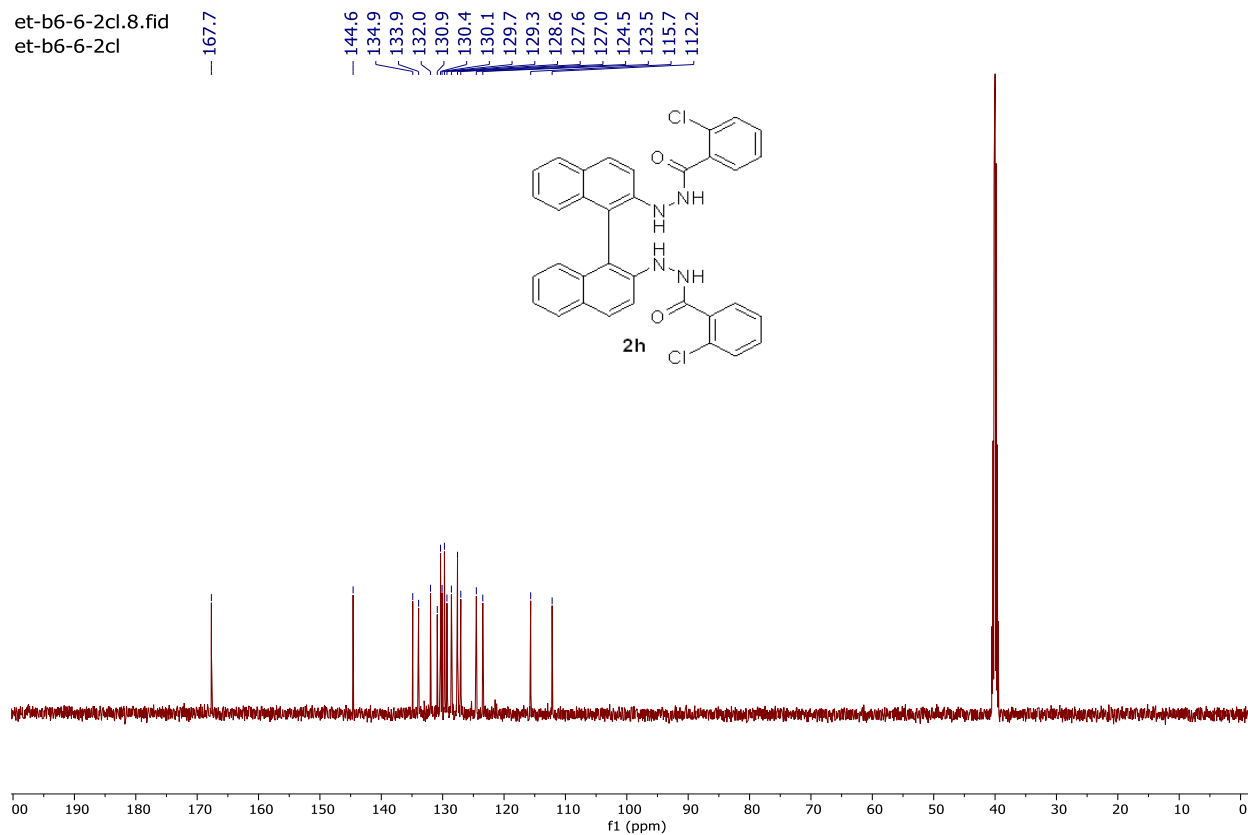



May18-2023-et-b6-3-bzf.10.fid  
May18-2023-et-b6-3-bzf

8.00  
7.91  
7.89  
7.58  
7.57  
7.55  
7.51  
7.48  
7.37  
7.34  
7.32  
7.30  
7.28  
7.21  
7.19  
7.18  
6.79  
6.76

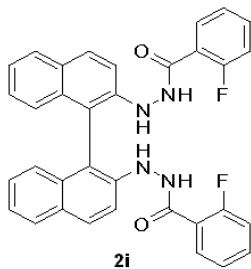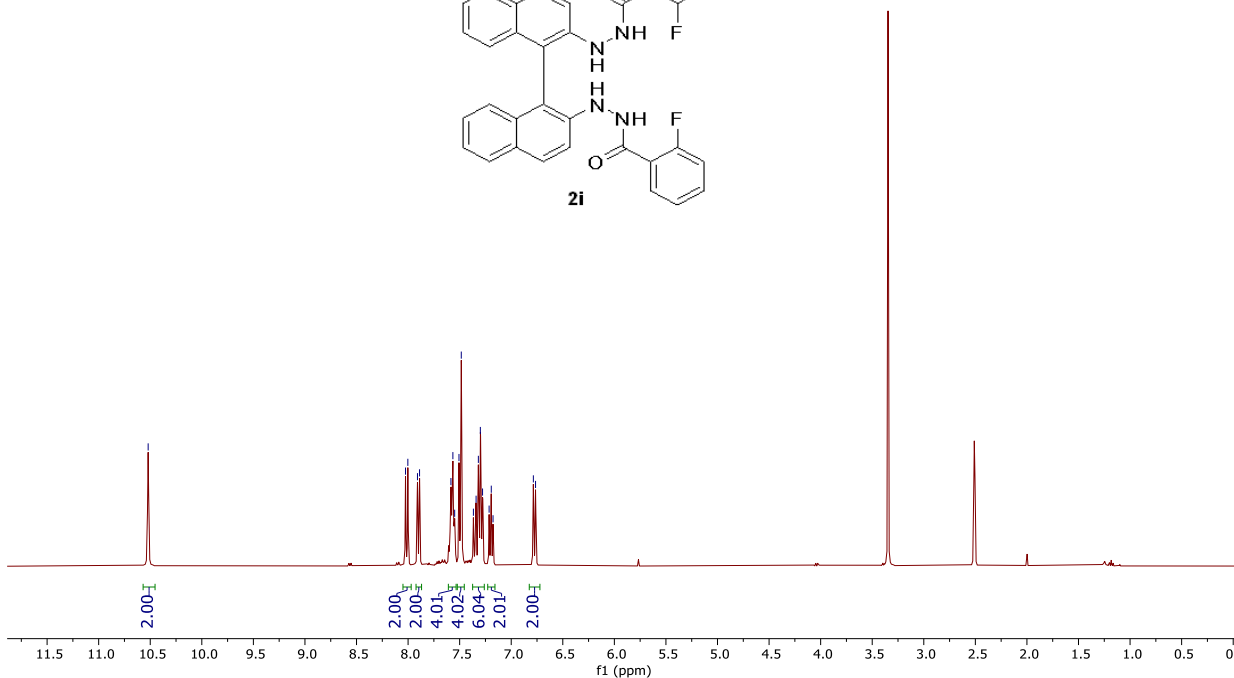

et-b6-13-2bzf.8.fid  
et-b6-13-2bzf

165.5  
160.7  
158.7  
144.7  
134.0  
133.5  
133.5  
130.4  
130.4  
130.2  
129.3  
128.6  
127.0  
125.1  
125.0  
124.5  
123.4  
122.7  
122.6  
116.9  
116.7  
115.4  
112.2

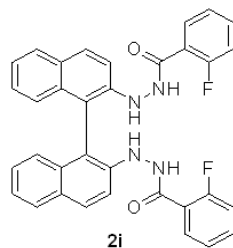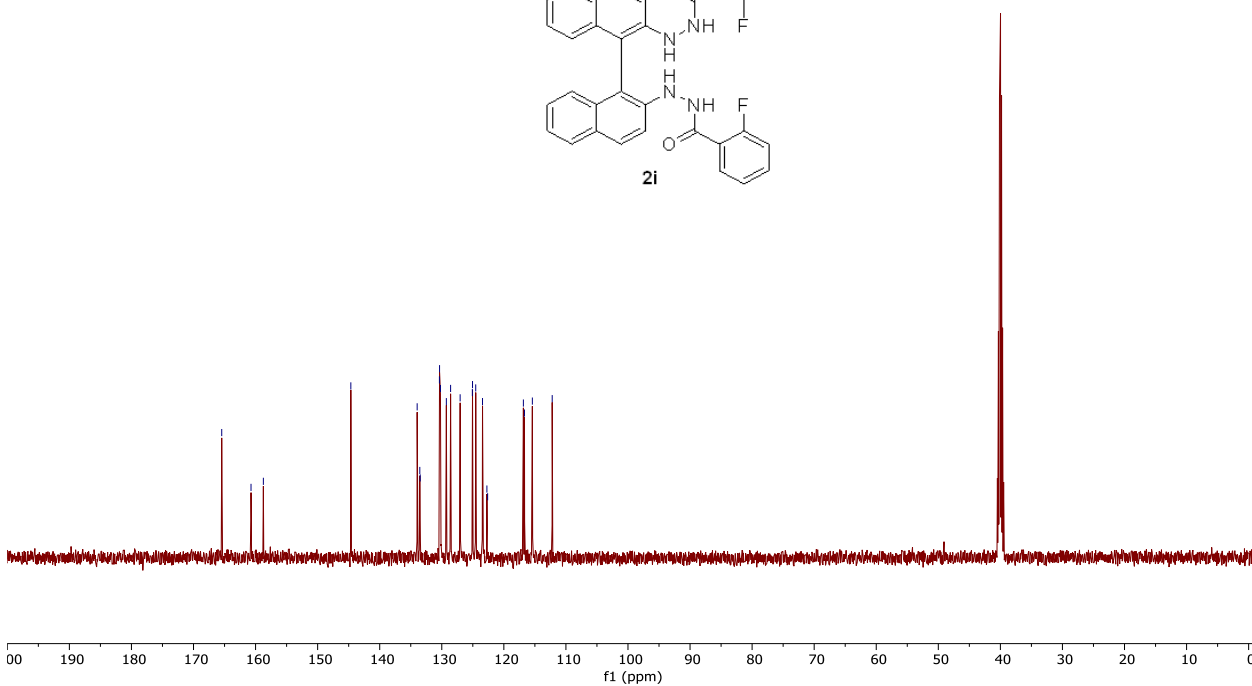

May18-2023-et-b6-10-2me.10.fid  
May18-2023-et-b6-10-2me

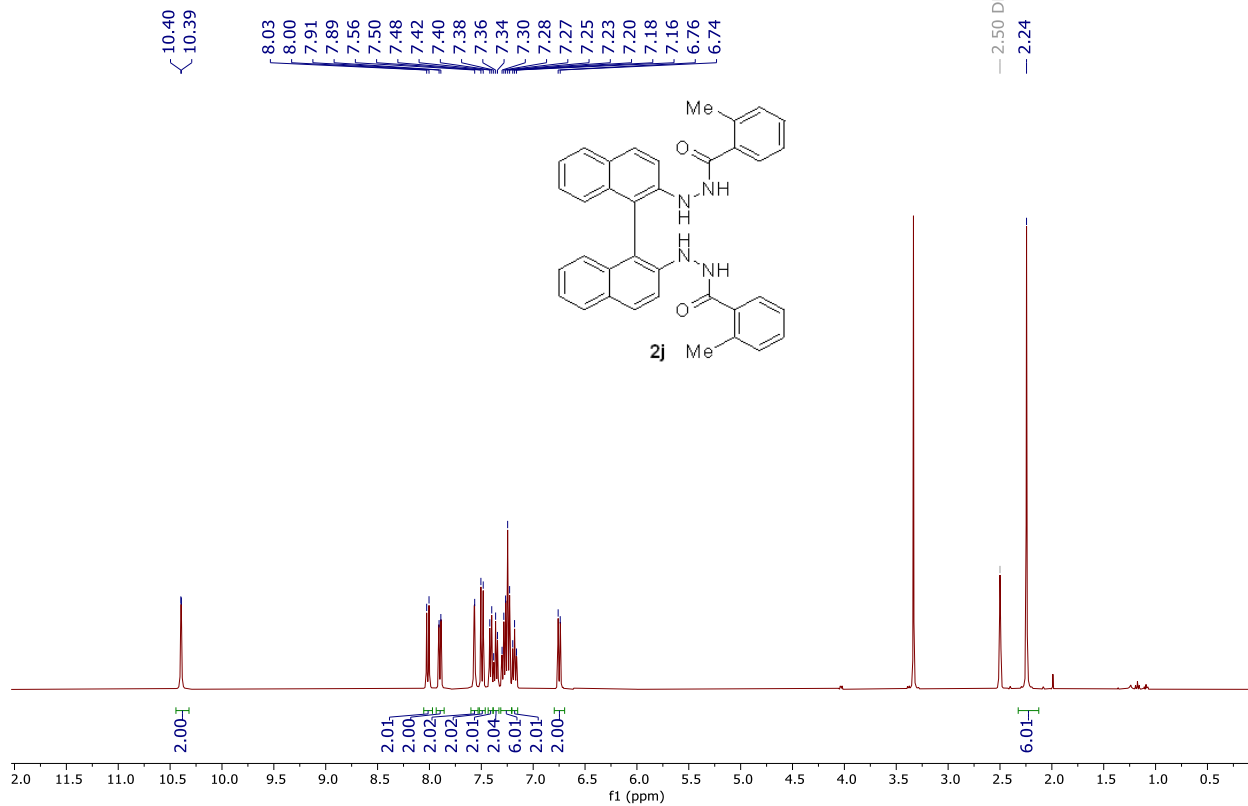

et-b6-10-2me.8.fid  
et-b6-10-2me

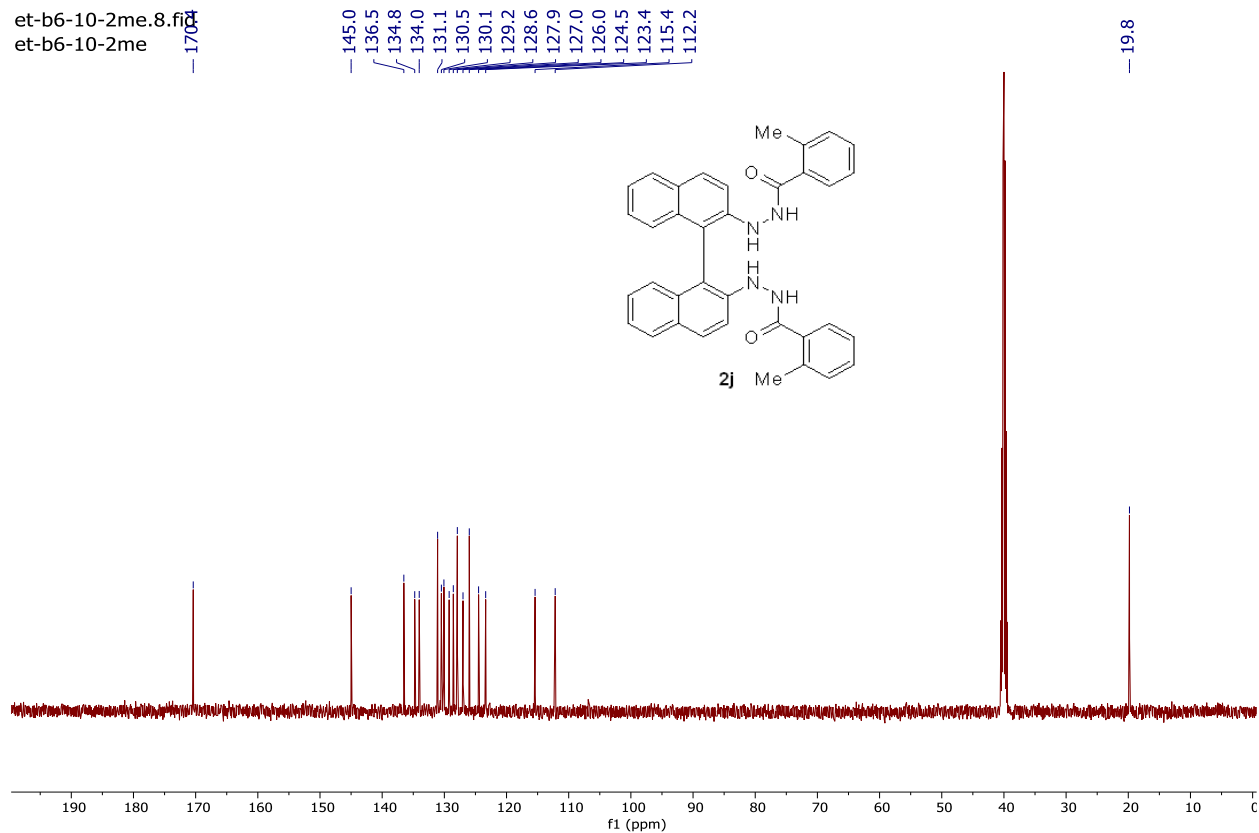

May18-2023 et-b6-13-1np-c13.63fid  
May18-2023 et-b6-13-1np-c13

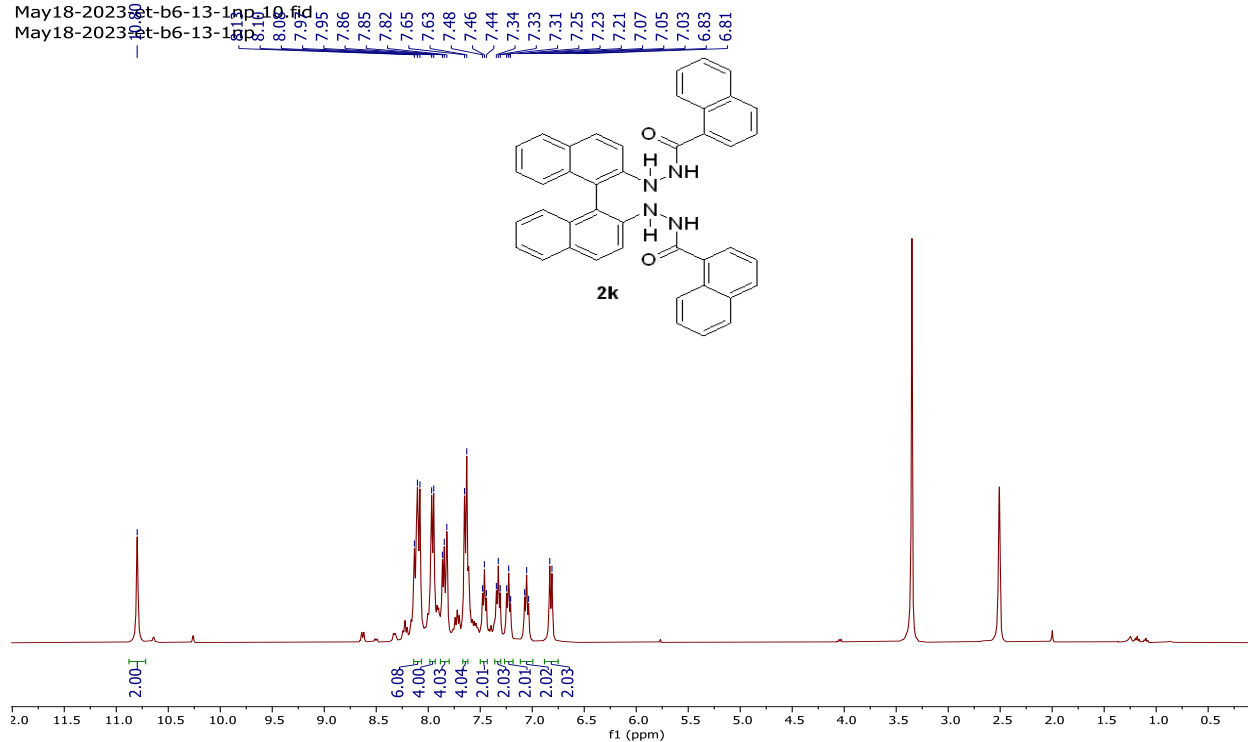

et-b6-13-1np-c13.63fid  
et-b6-13-1np-c13

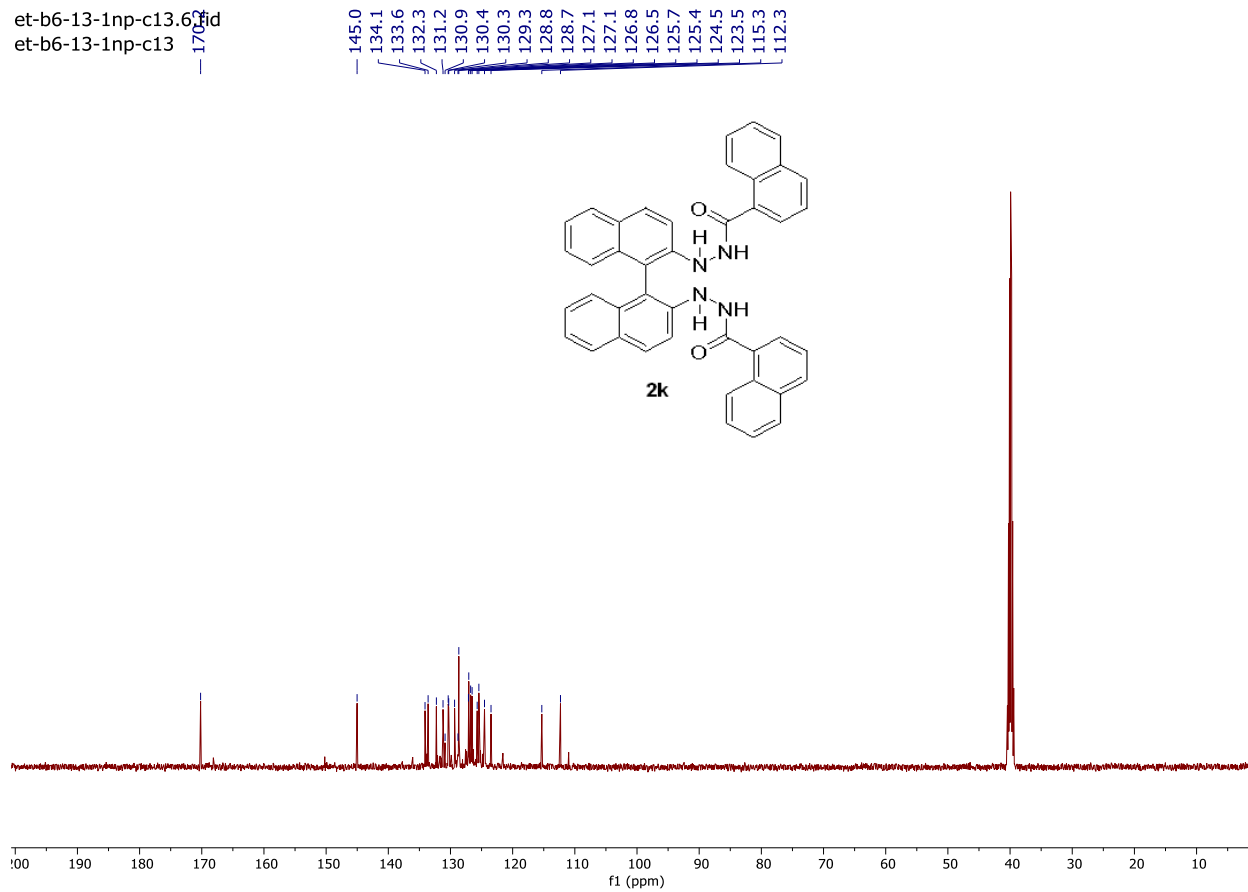

et-b6-2np-l3.8.fid  
et-b6-2np-l

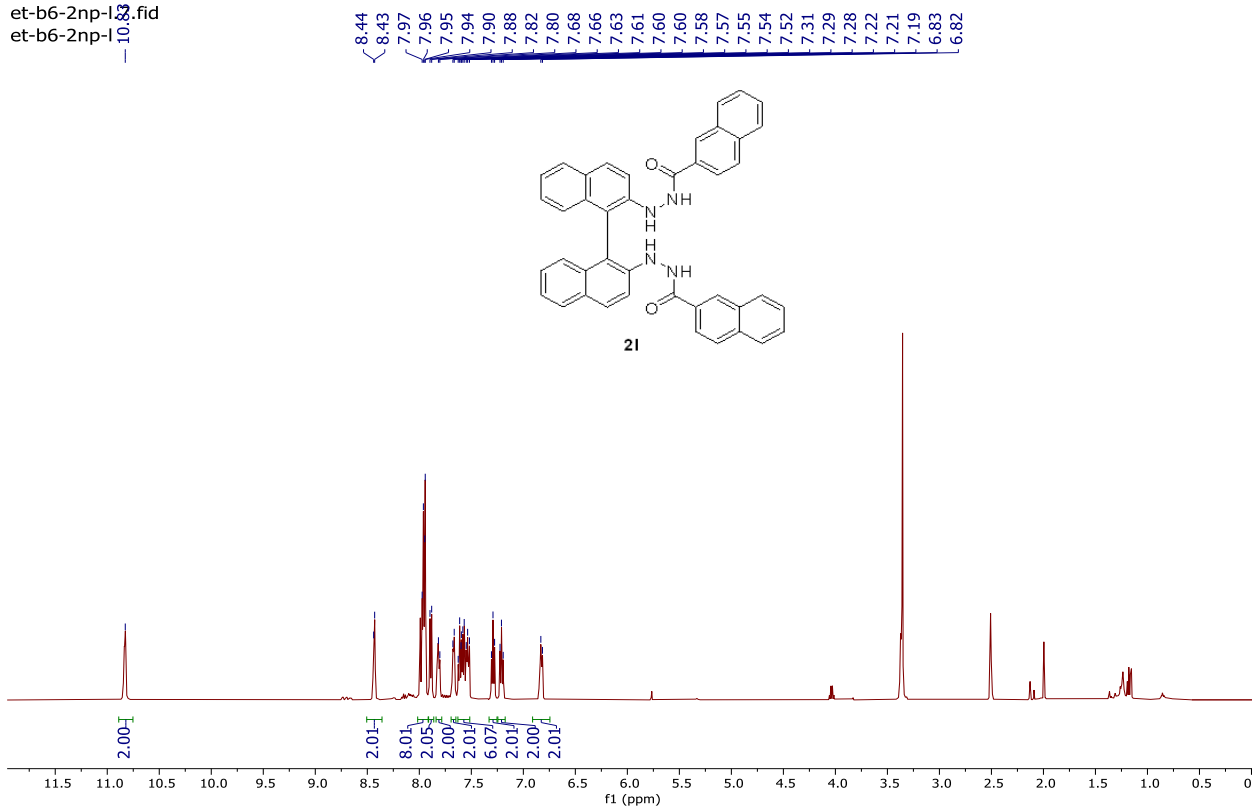

et-b6-2np-c13.6.fid  
et-b6-2np-c13

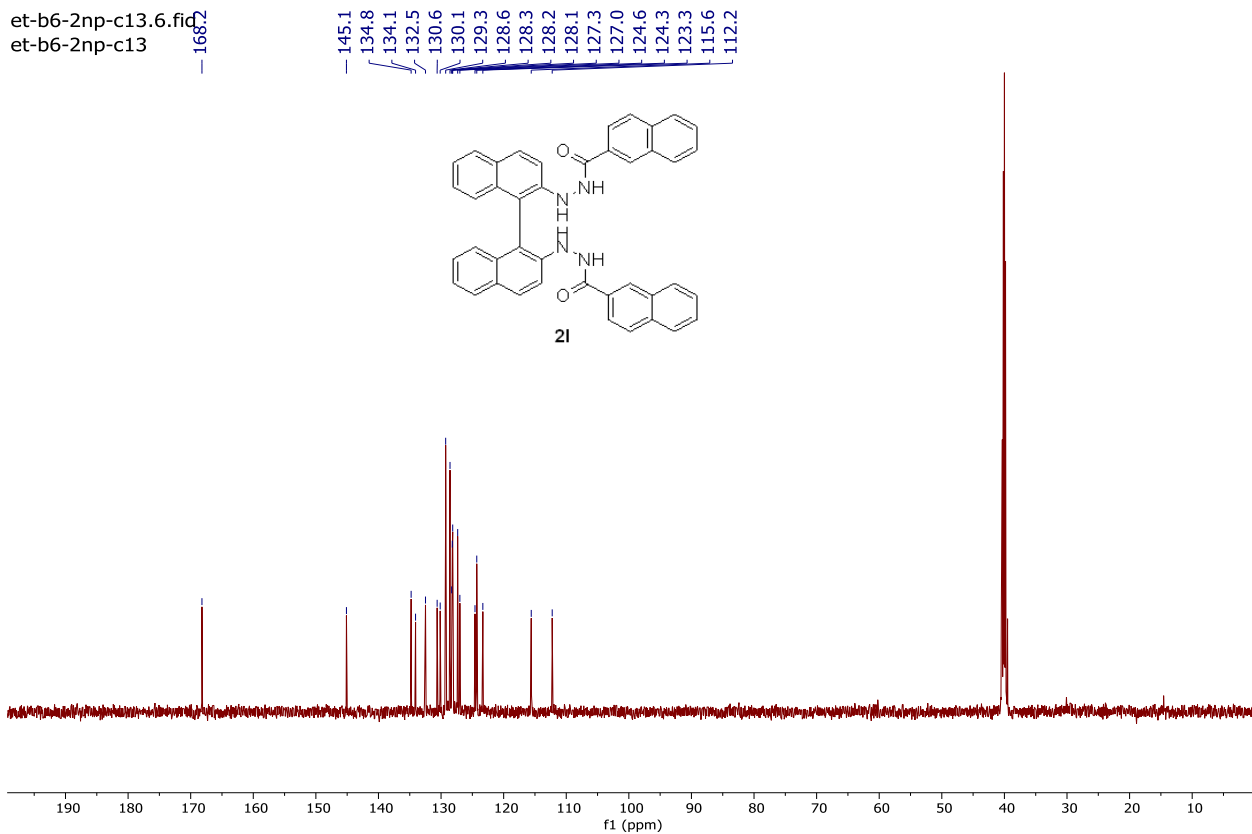

et-b6-bzff-r.7.fid  
et-b6-bzff-r

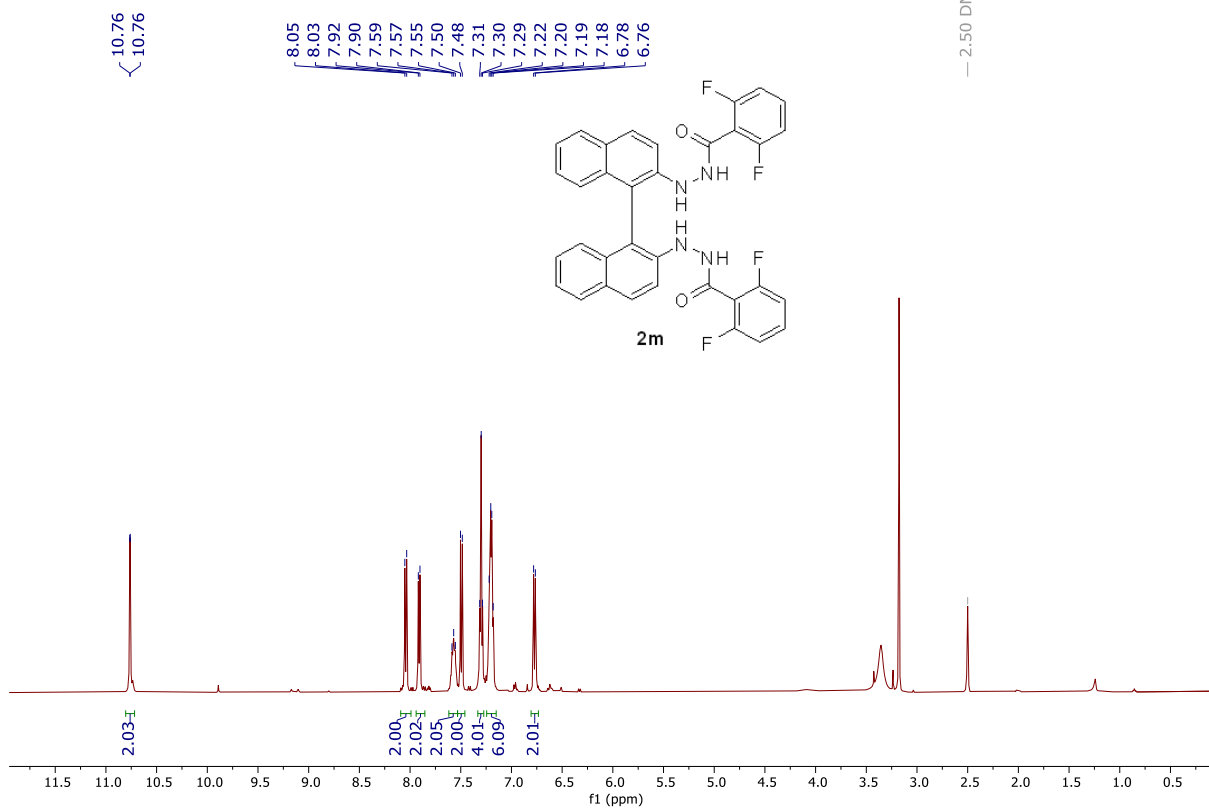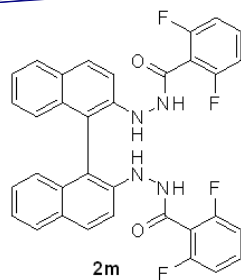

et-b6-bzff-r-c13.6.fid  
13C AVNEO500

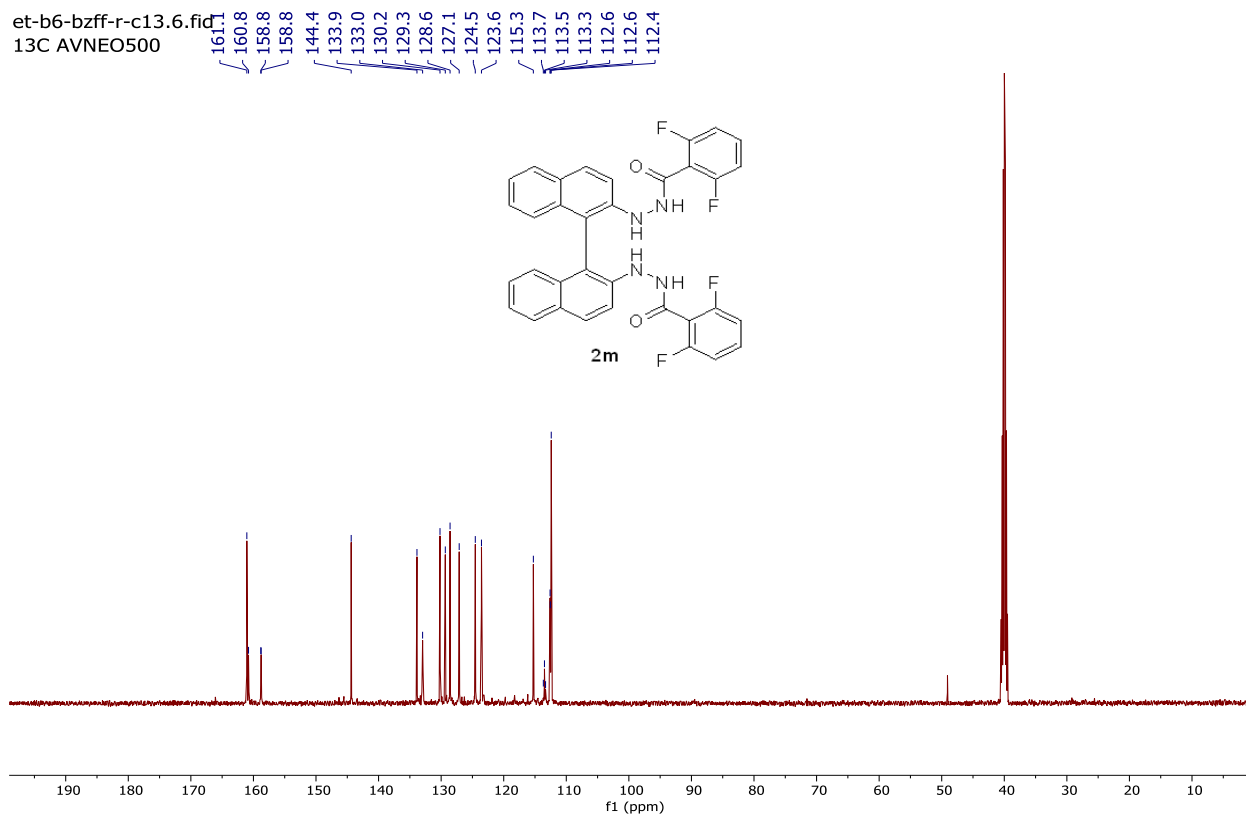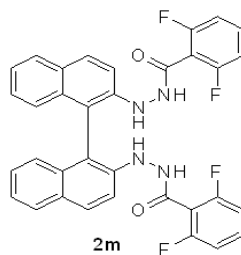

Nov02-2023-et-b6-6ome-bm-h.10.fid  
Nov02-2023-et-b6-6ome-bm-h

— 2.50 DMSO-d6

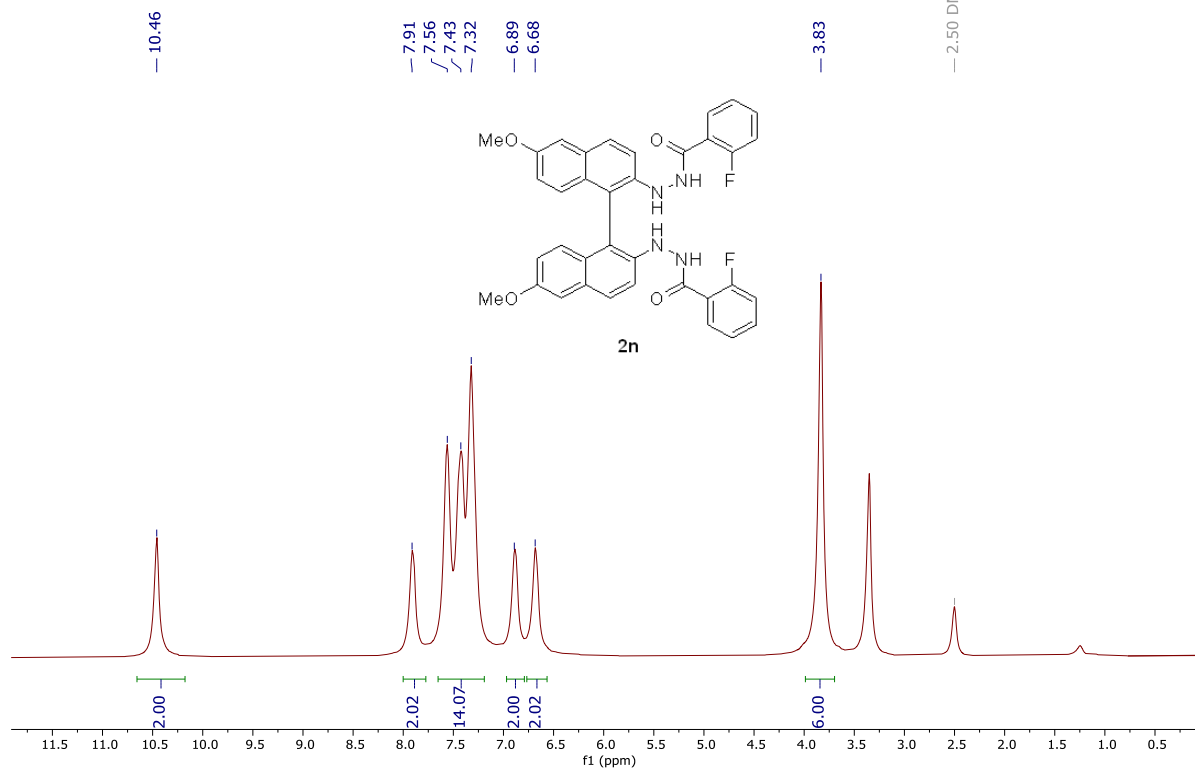

et-b6-6-ome-c13.6.fid  
et-b6-6-ome-c13

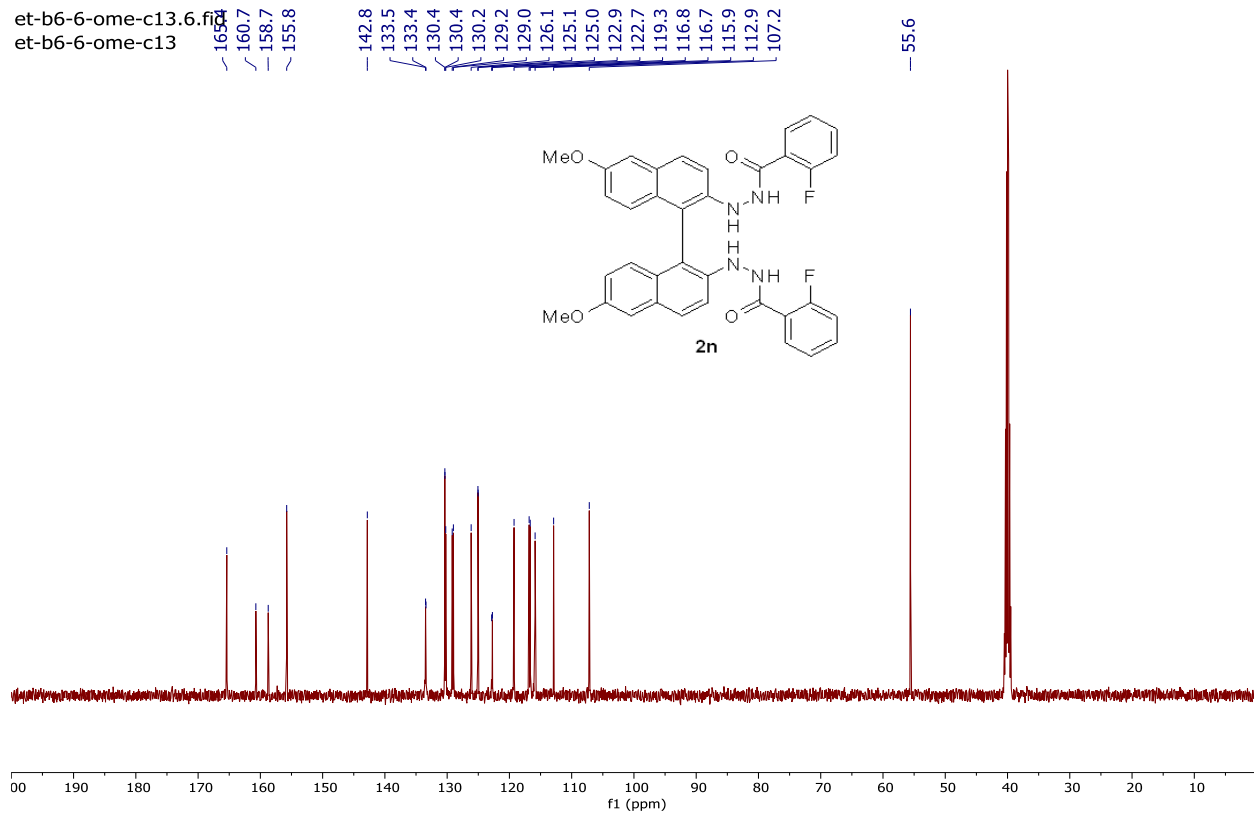

Oct24-2023-et-b6-6me-bm.10.fid  
Oct24-2023-et-b6-6me-bm

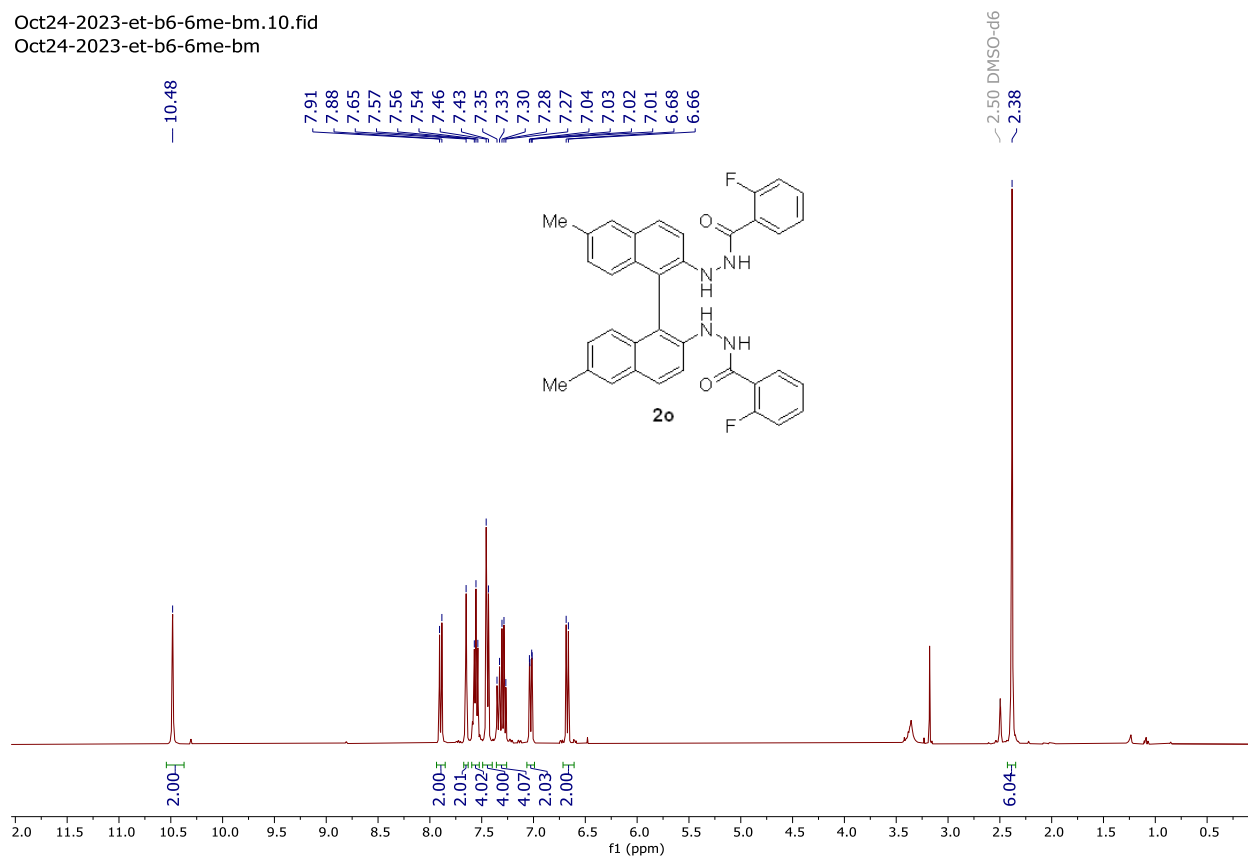

et-b6-r6me-bnm-c13  
et-b6-r6me-bnm-c13

143.9  
133.5  
133.4  
132.3  
132.2  
130.4  
129.4  
129.1  
127.5  
125.1  
125.0  
124.6  
122.8  
122.7  
116.8  
116.7  
115.4  
112.4

21.3

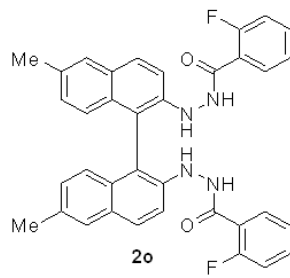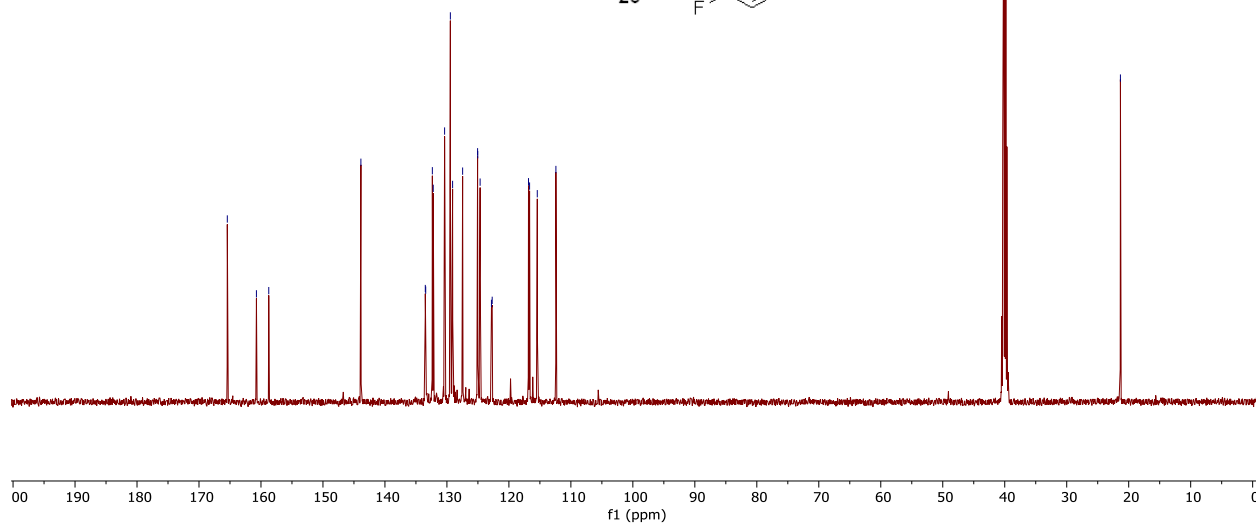





Nov02-2023-et-b6-6cyx-bm-h.10.fid  
Nov02-2023-et-b6-6cyx-bm-h

8.67 7.78 7.76 7.53 7.37 7.35 7.10 7.08 7.06 7.06 7.04 7.03 7.01 6.99 6.97 2.53 2.50 2.50 2.47 1.85 1.83 1.77 1.75 1.69 1.68 1.65 1.42 1.38 1.36 1.33 1.30 1.22 1.19 1.16

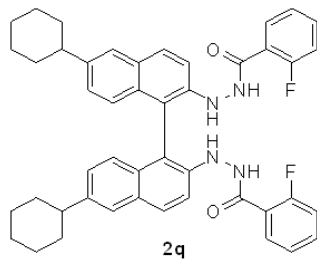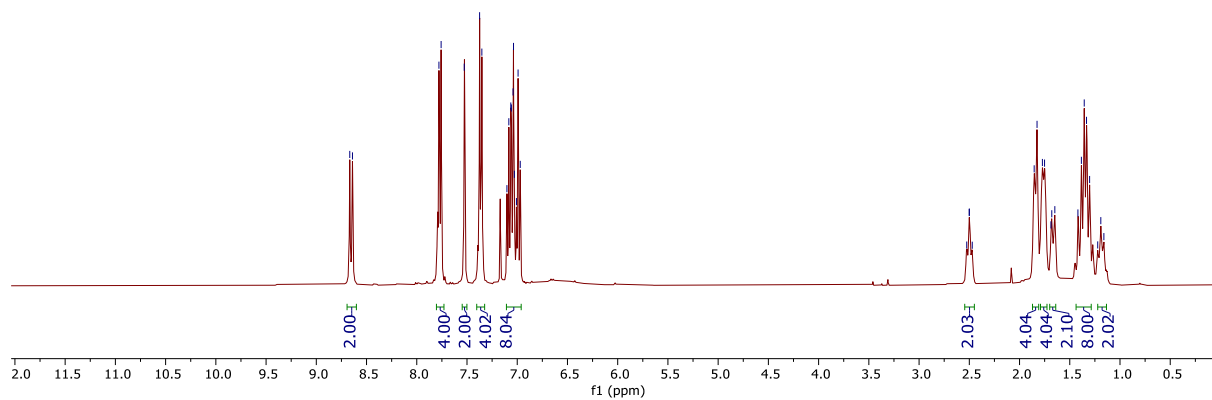

et-b6-cyx-c13.6.fid  
et-b6-cyx-c13

164.4 164.4 161.6 159.6 143.4 143.0 133.7 133.6 132.5 131.9 130.0 129.8 127.5 124.8 124.7 119.9 119.8 116.2 116.0 115.5 113.9 44.3 34.5 34.3 27.0 26.2

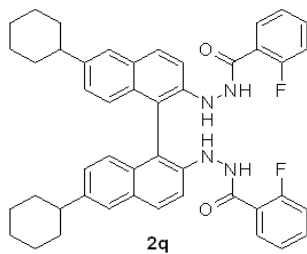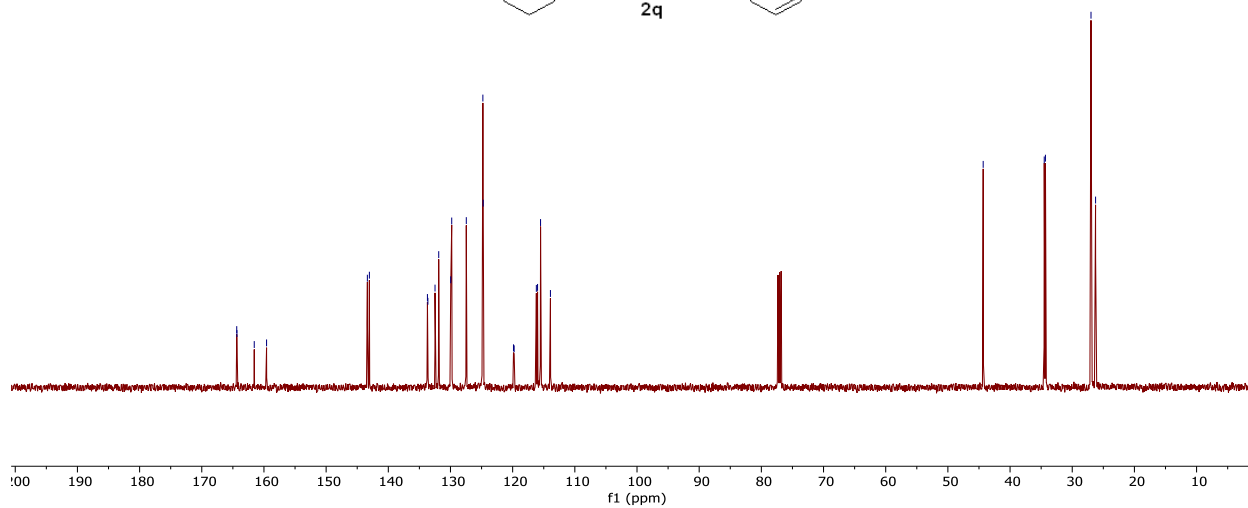

et-b6-6-ph-bnm.7.fid  
et-b6-6-ph-bnm

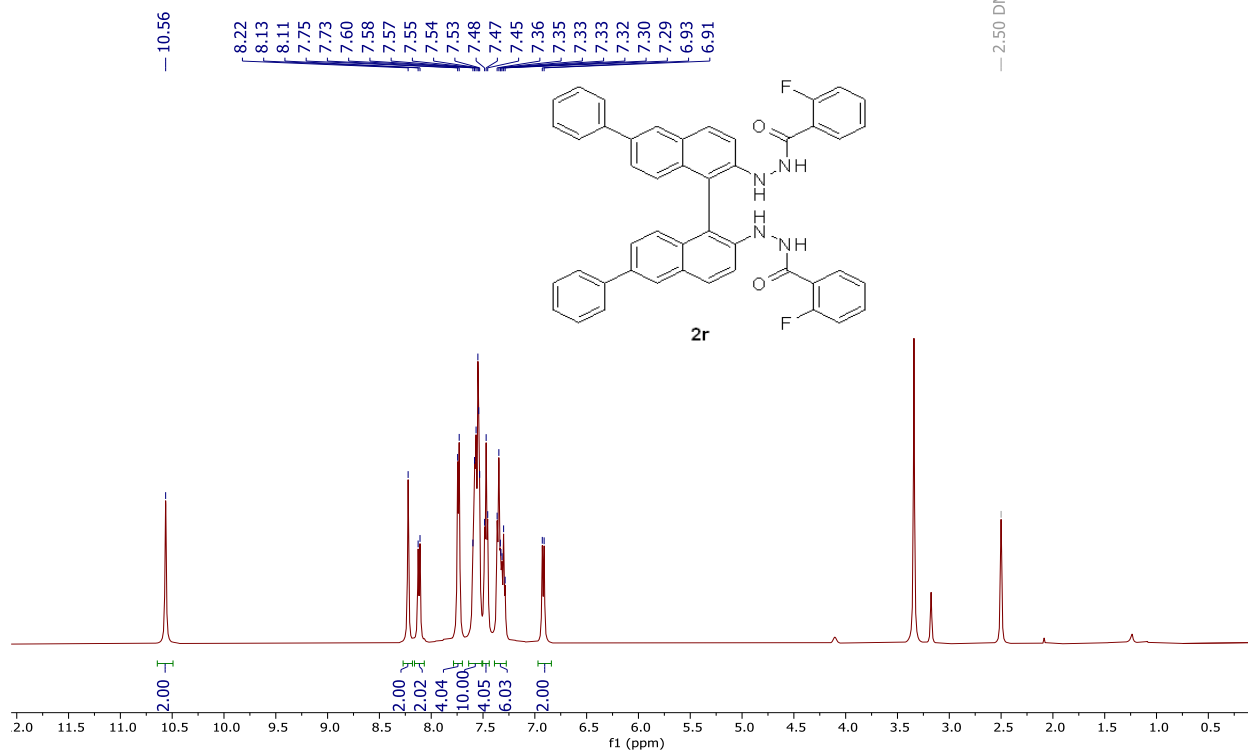

et-b6-6-ph-bnm-c13-5  
et-b6-6-ph-bnm-c13-5

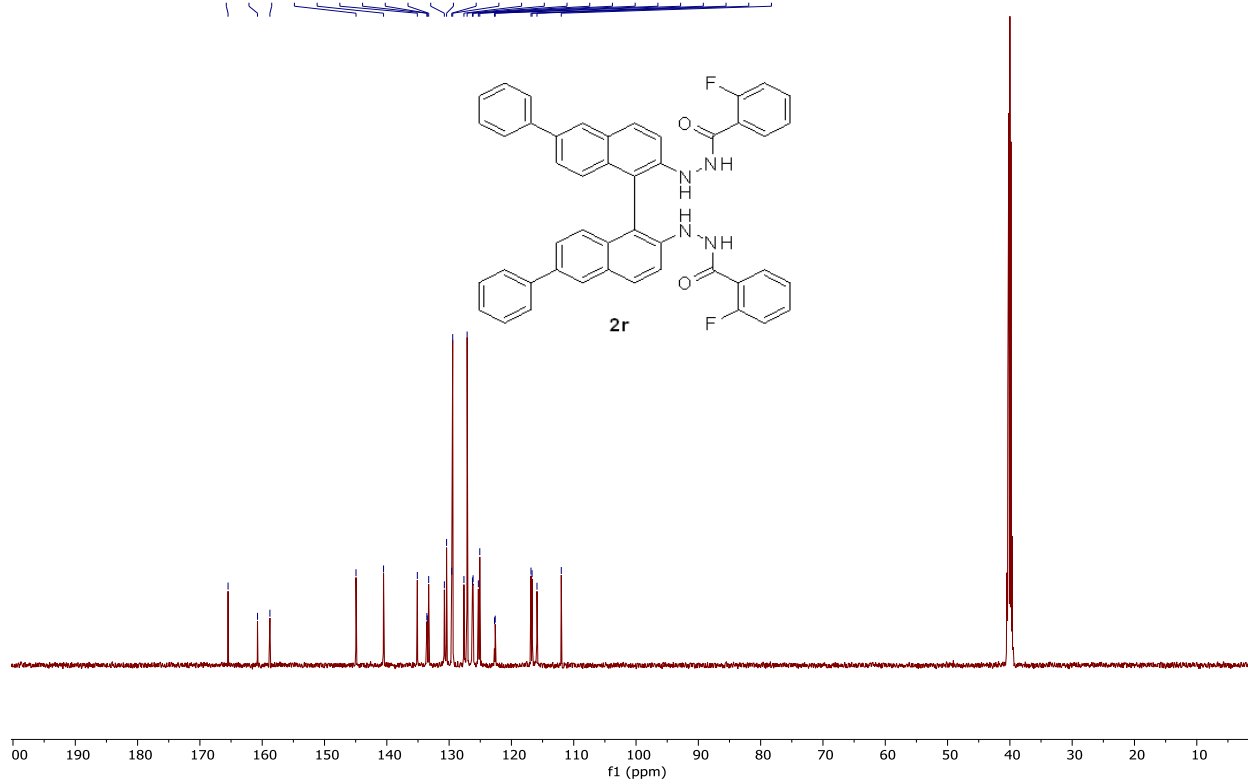

et-b6-6br-bnm.7.fid  
et-b6-6br-bnm

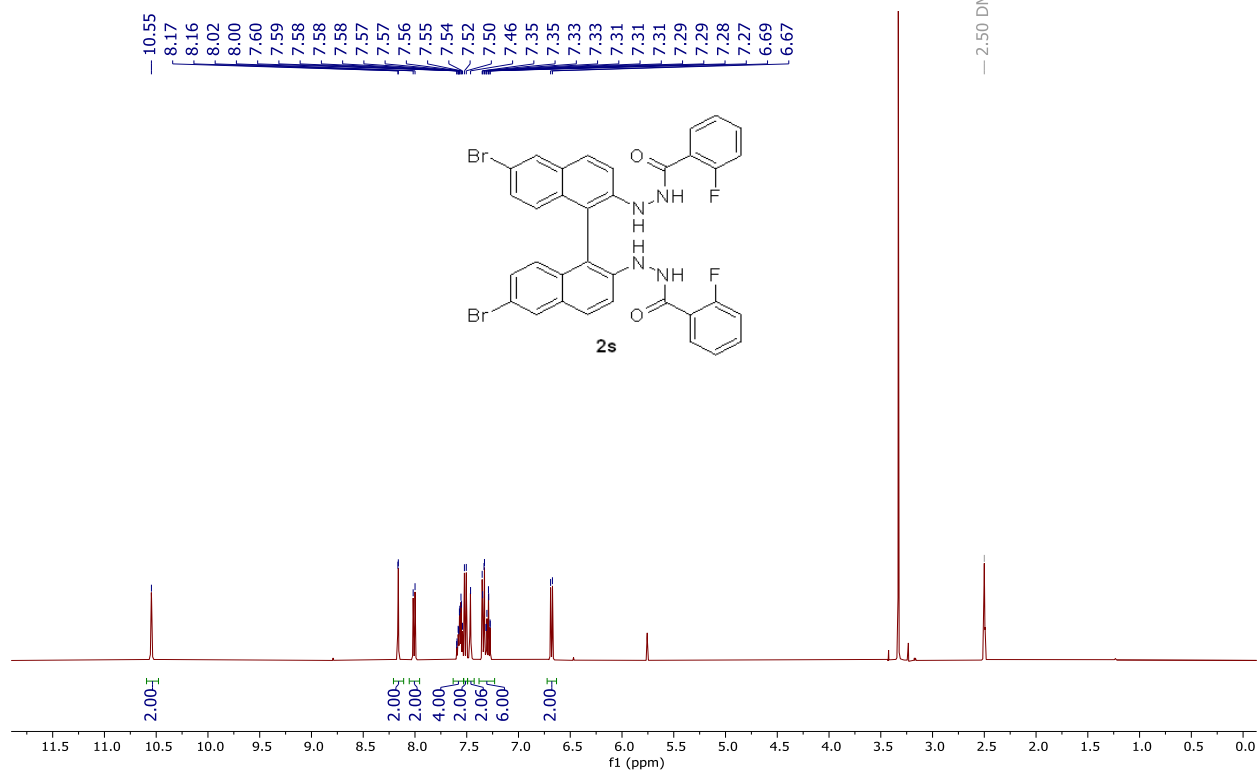

et-b6-6br-bnm-c13.6.fid  
et-b6-6br-bnm-c13

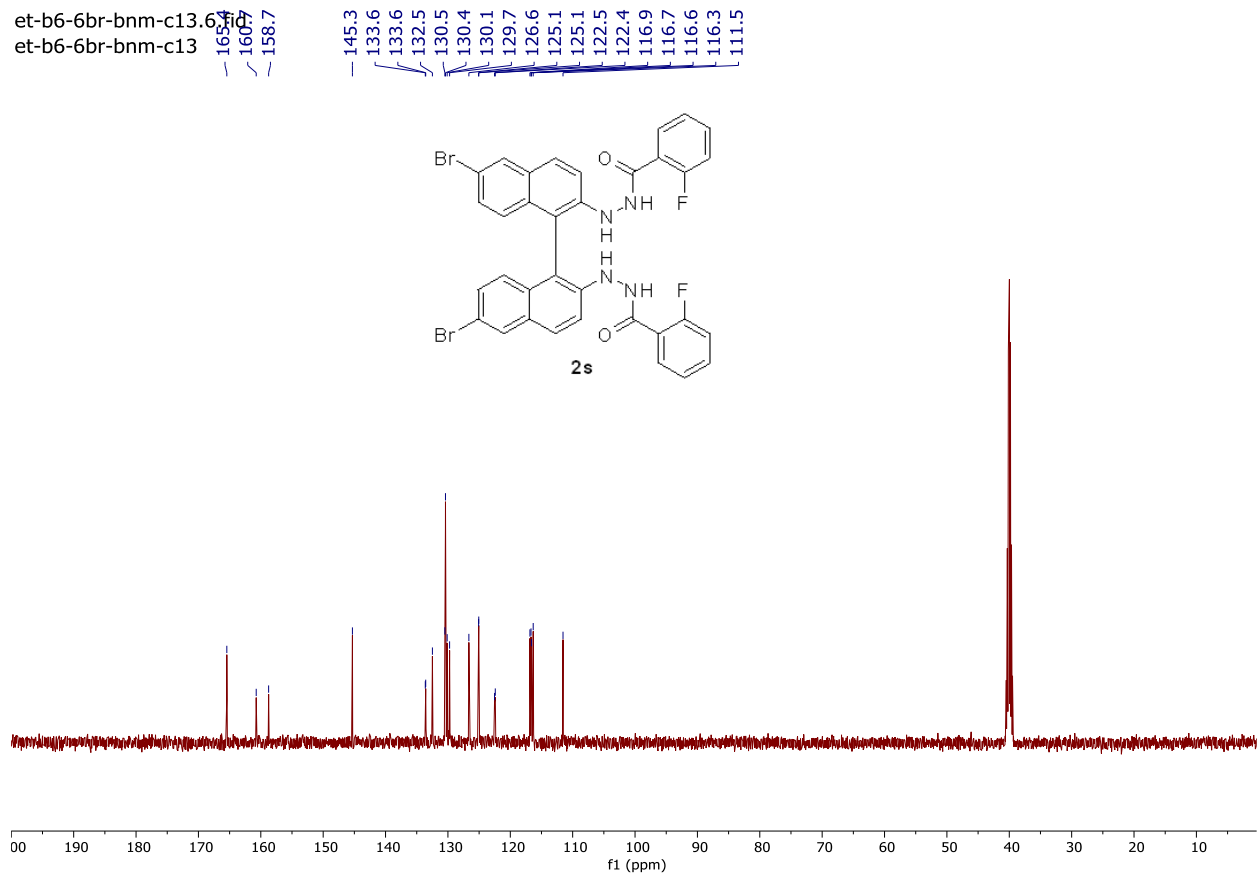

May18-2023-et-b6-6-sa-bnm.10.fid  
May18-2023-et-b6-6-sa-bnm

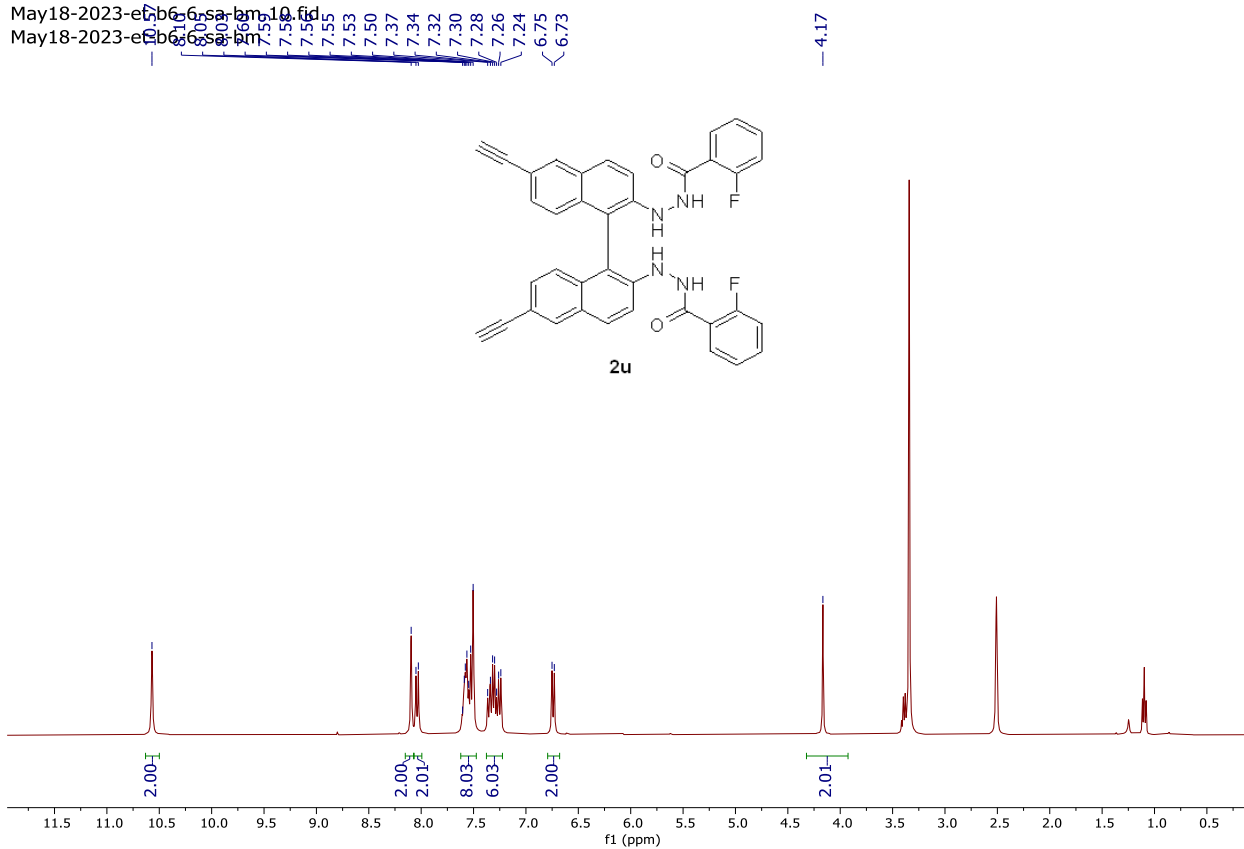

et-b6-6-sa-bnm.8.fid  
et-b6-6-sa-bnm

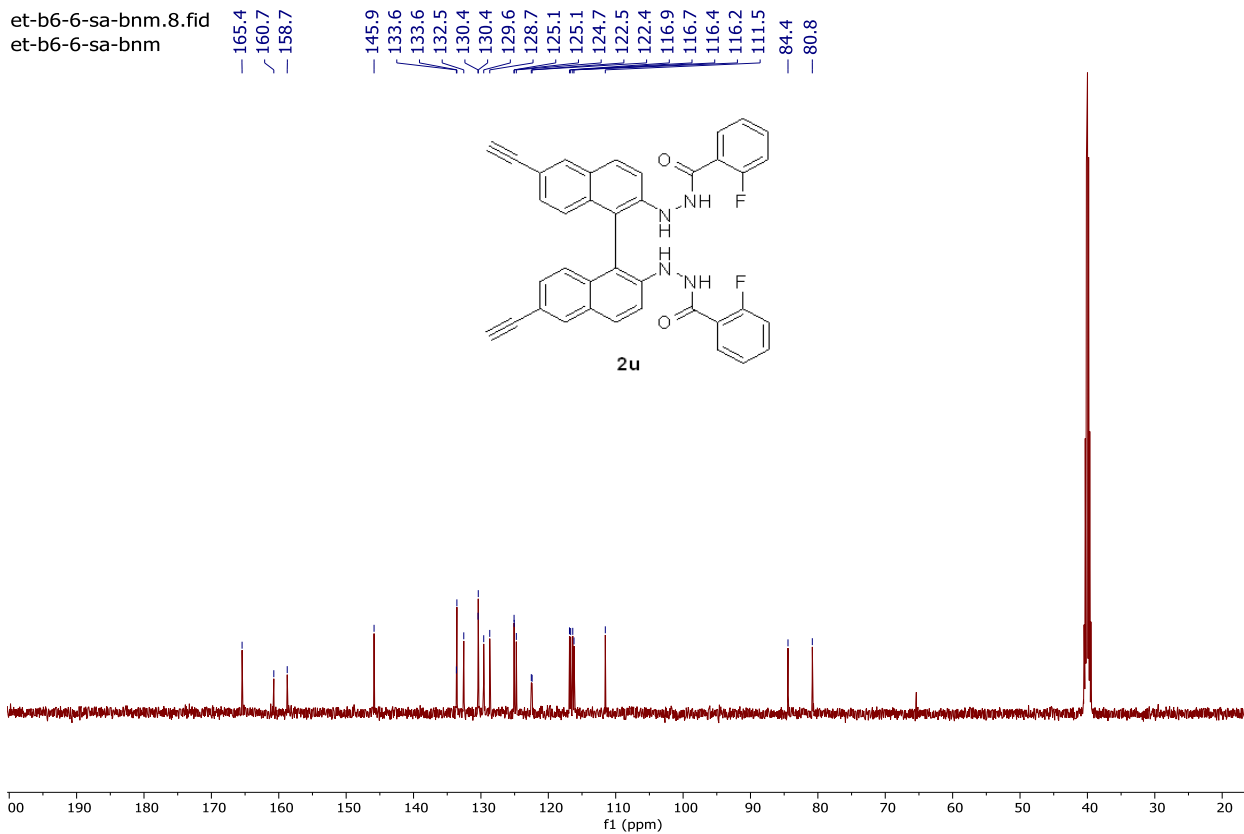

et-f-bnm.6.fid  
et-f-bnm

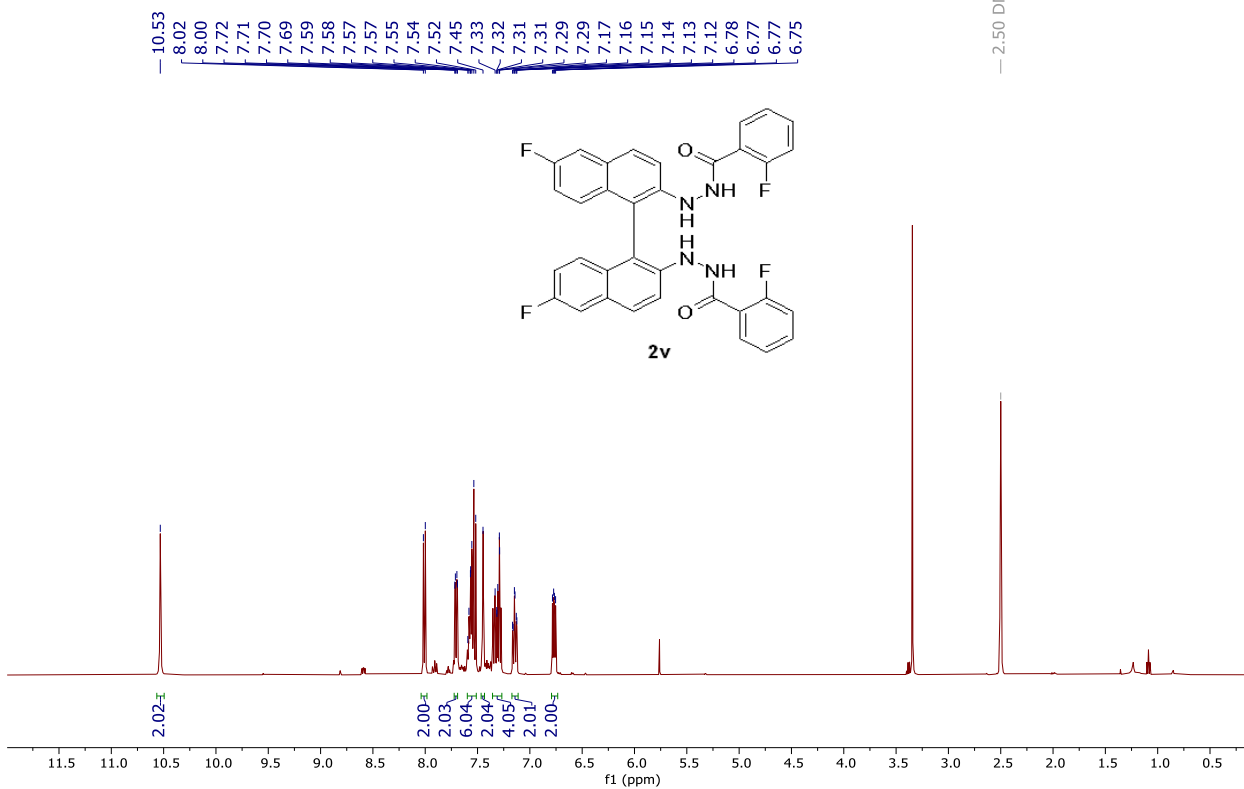

et-b6-6f-c13r.6.fid  
et-b6-6f-c13r

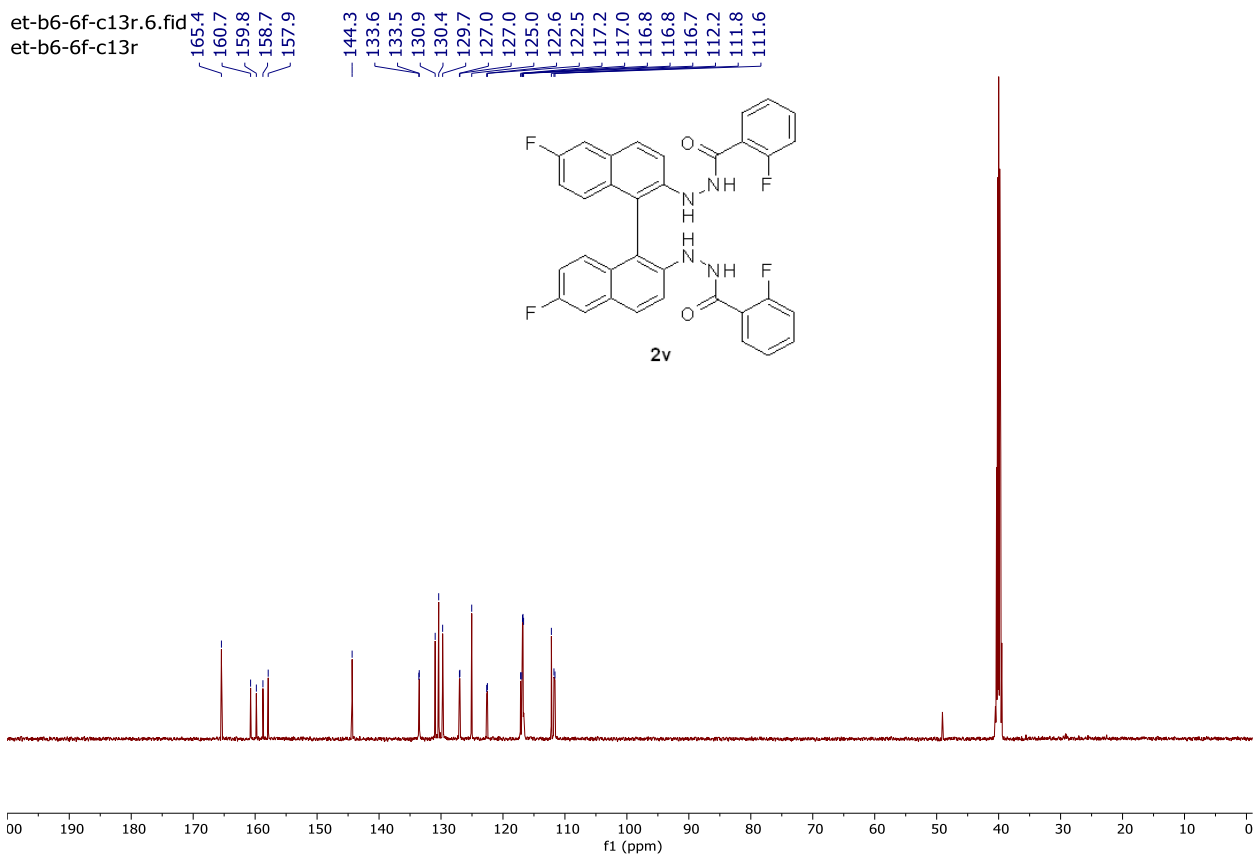

et-b6-6coome-bnm.5.fid  
et-b6-6coome-bnm

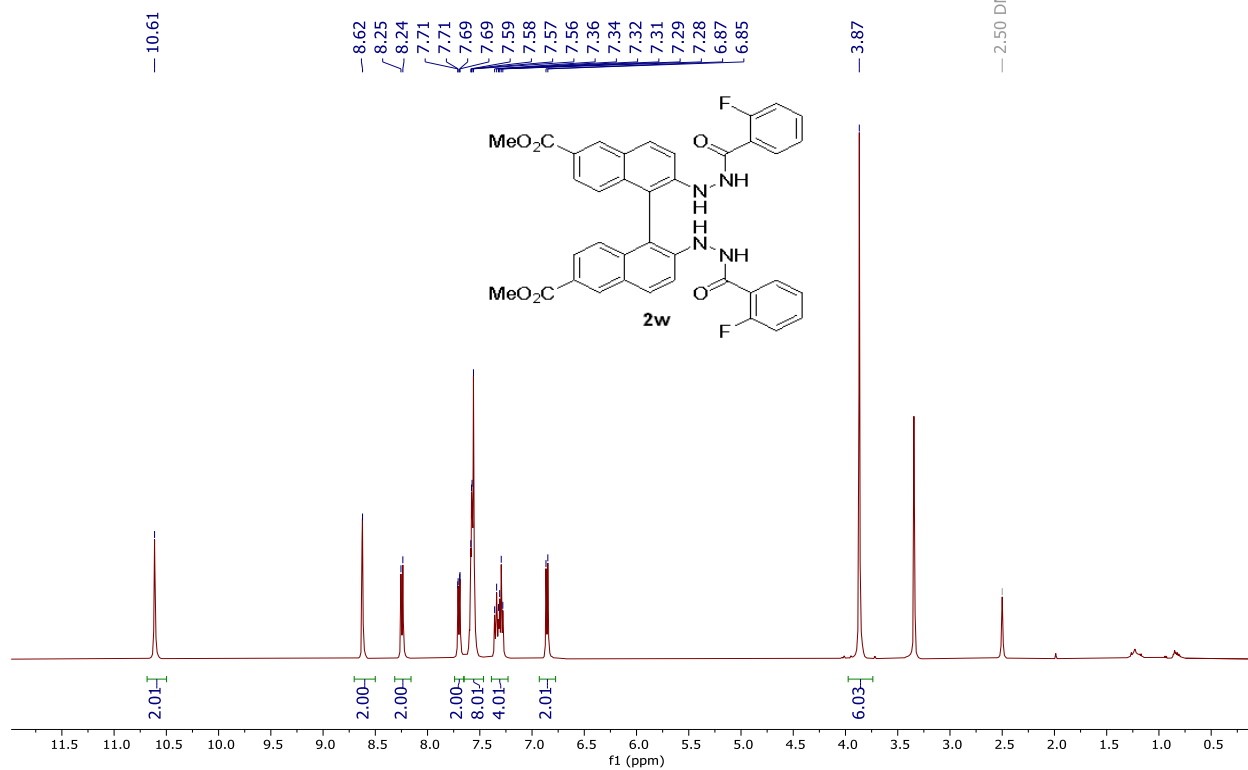

et-b6-6coome-bnm-1660  
et-b6-6coome-bnm-1654  
et-b6-6coome-bnm-1603  
et-b6-6coome-bnm-1588

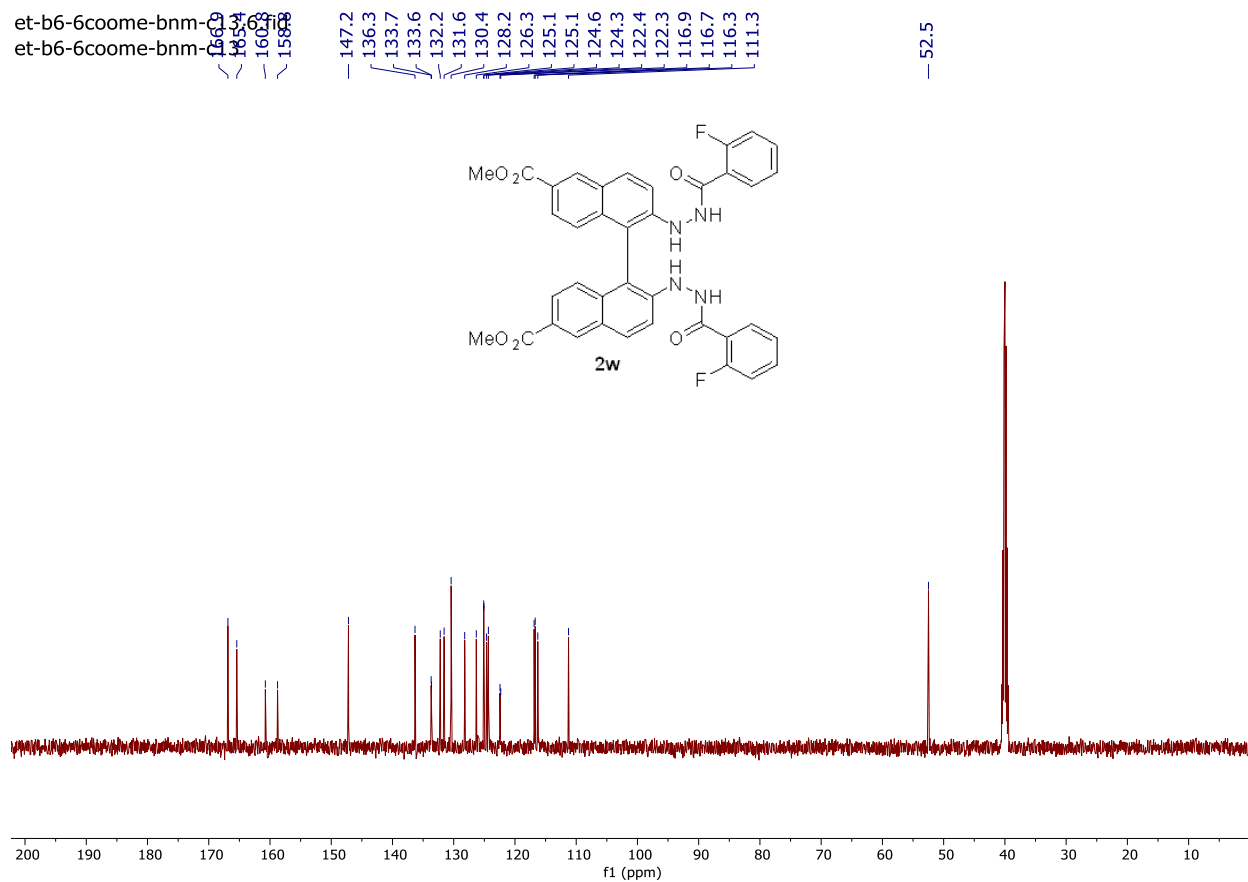

Sep23-2023-et-7me-bm.10.fid  
Sep23-2023-et-7me-bm

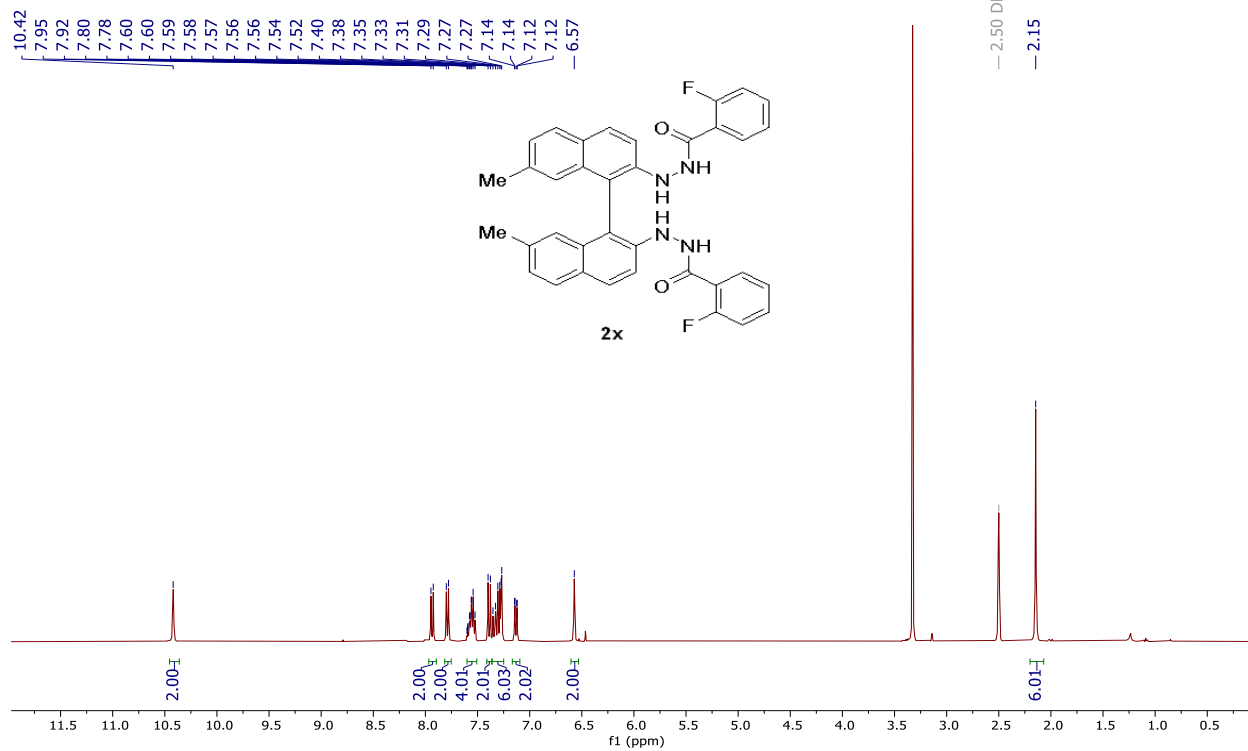

et-b6-b6-bmr-7me-c.63  
et-b6-b6-bmr-7me-c

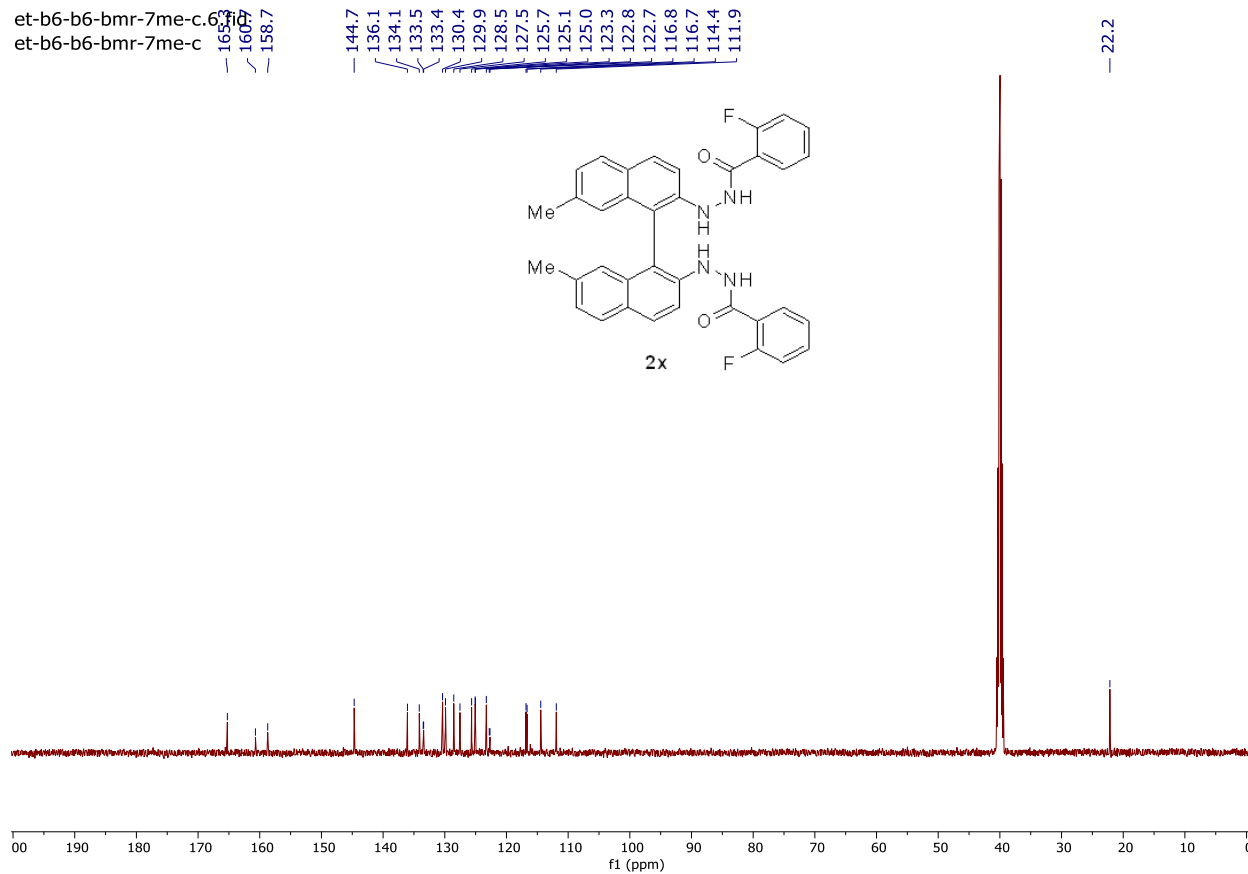



et-b6-7ph-bnm.7.fid  
et-b6-7ph-bnm

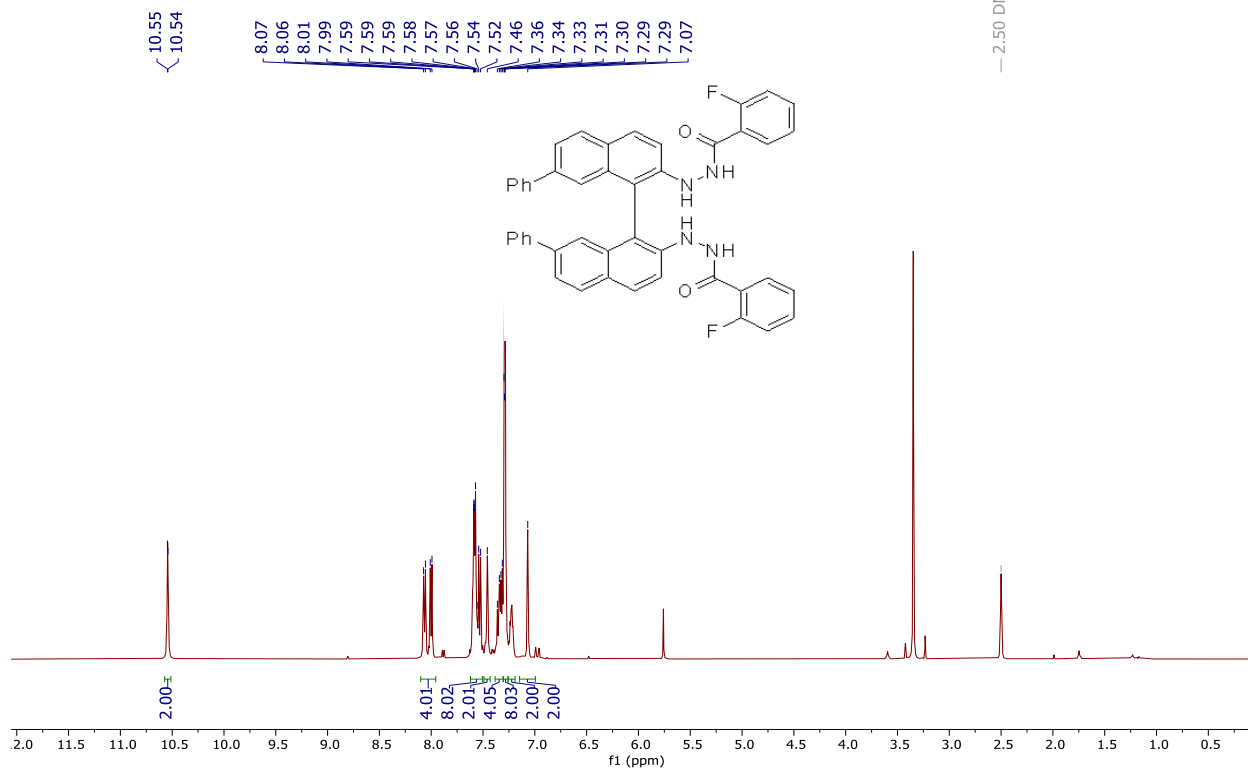

et-b6-7ph-c13-bnm.6.fid  
et-b6-7ph-c13-bnm

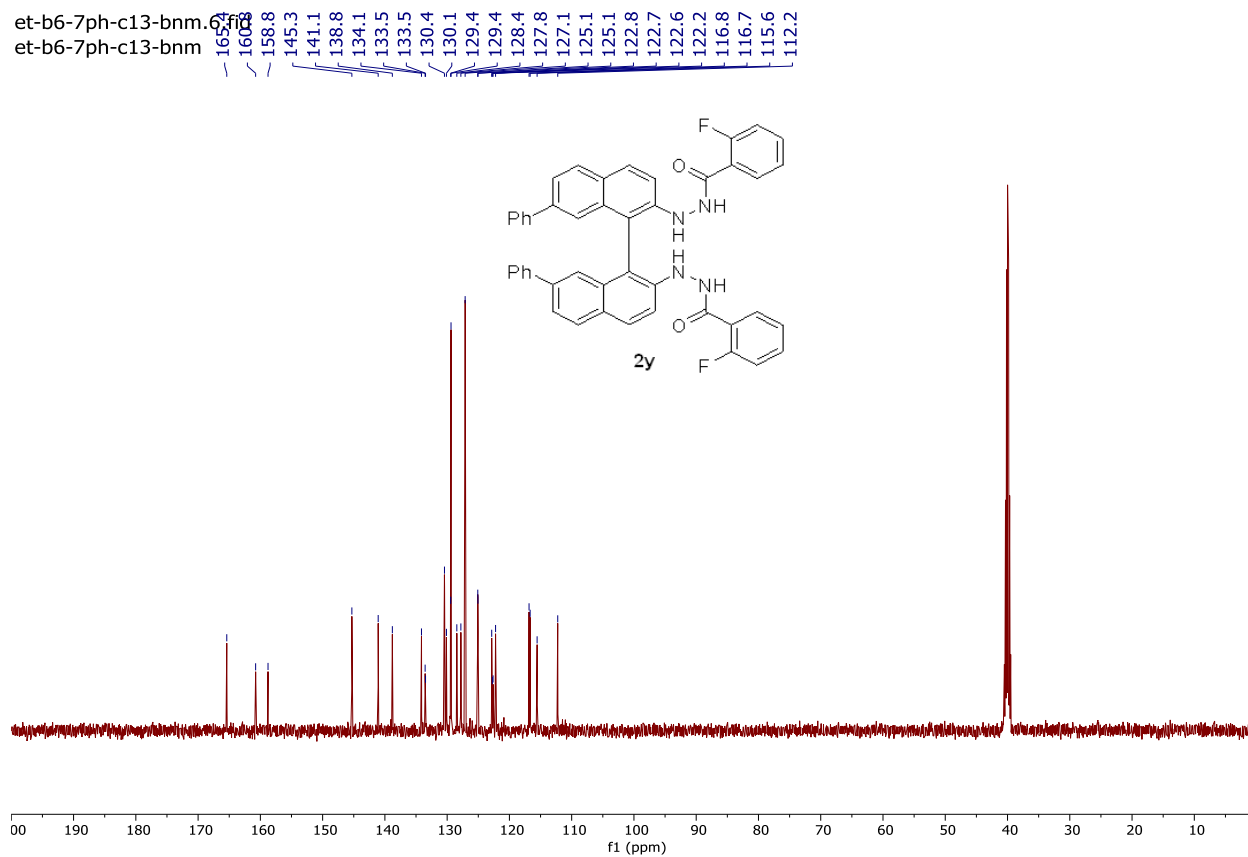

et-b6-7br-bnm-r.7.fid  
et-b6-7br-bnm

—2.50 DMSO-d6

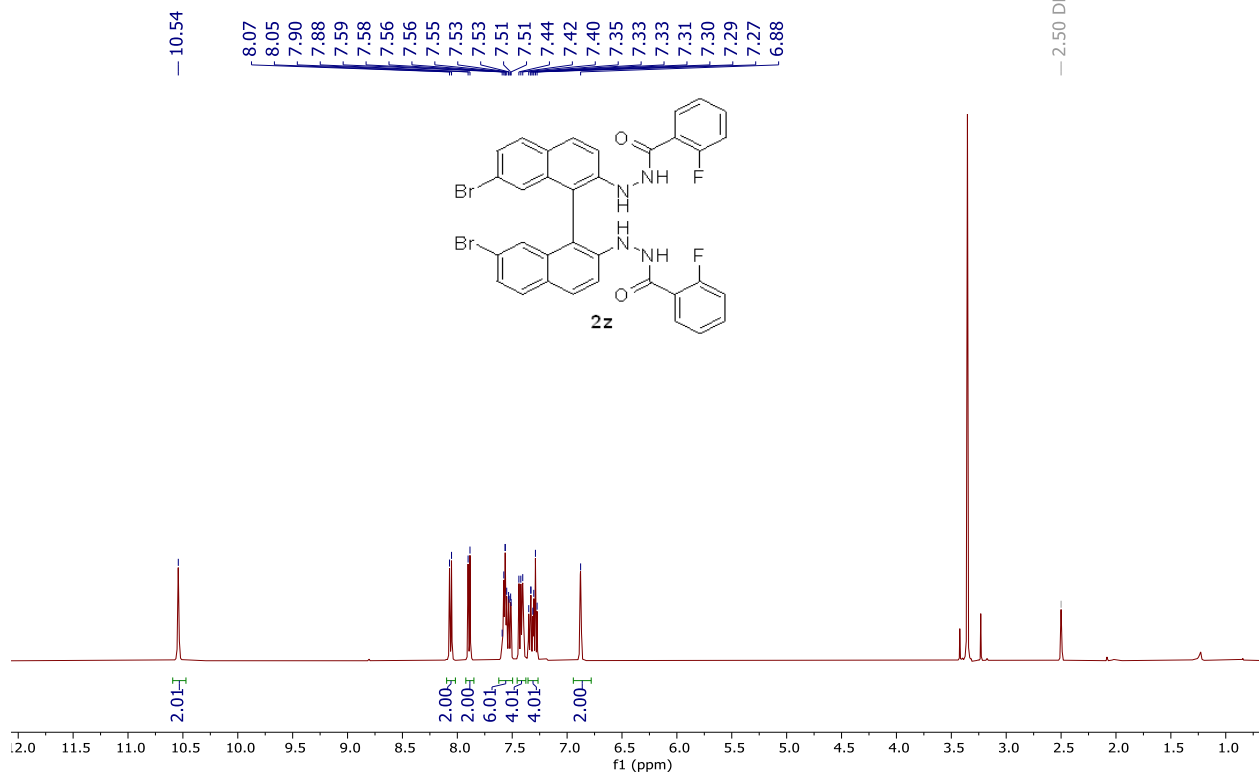

et-b6-7br-bnm-c13.6.fid  
et-b6-7br-bnm-c13

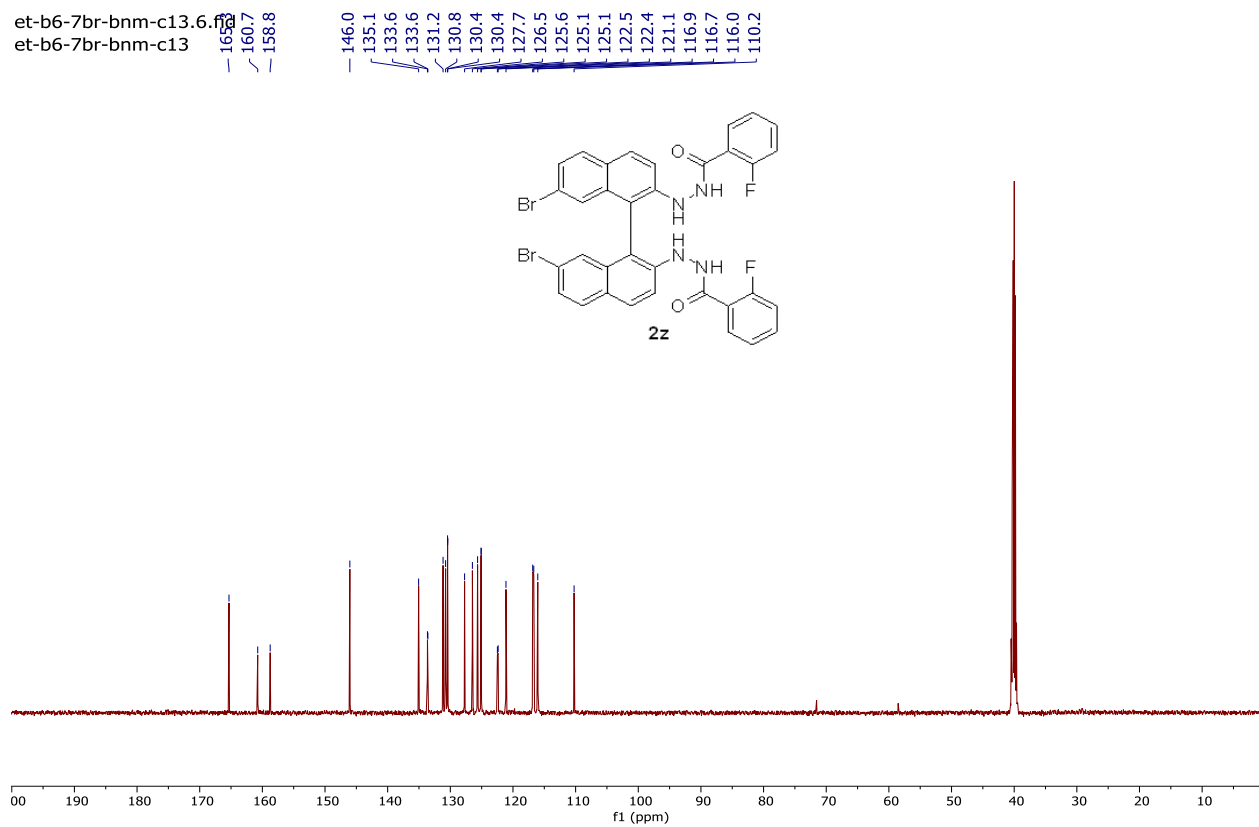

S

Nov06-2023-et-b6-8ch3-bm.10.fid  
Nov06-2023-et-b6-8ch3-bm

8.49  
8.46  
8.02  
8.01  
8.00  
7.99  
7.98  
7.97  
7.65  
7.62  
7.52  
7.50  
7.48  
7.47  
7.44  
7.44  
7.44  
7.43  
7.42  
7.28  
7.27  
7.22  
7.21  
7.19  
7.17  
7.15  
7.13  
7.11  
7.10  
7.07  
7.07  
7.05  
7.04  
2.48

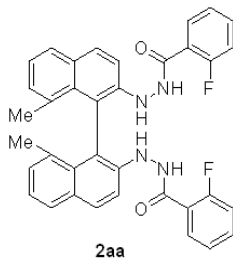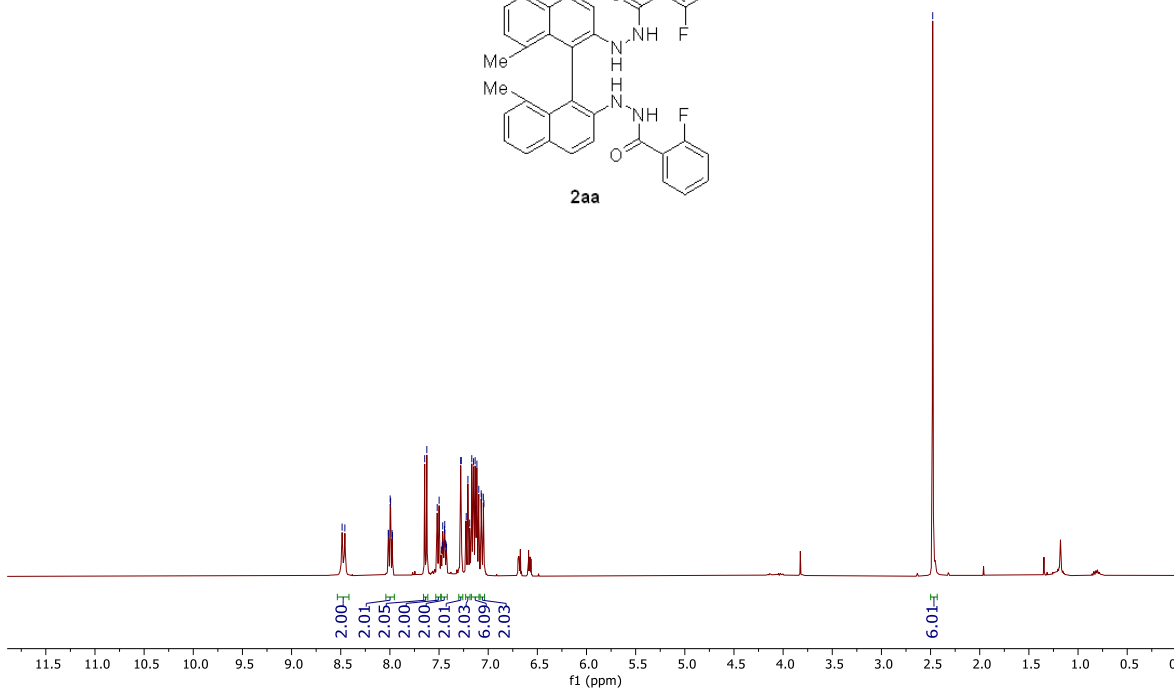

Nov07-2023-et-b6c-8ch3-10.fid  
Nov07-2023-et-b6c-8ch3-10.fid

145.4  
134.1  
134.1  
133.5  
132.9  
132.2  
132.1  
130.0  
129.6  
127.2  
126.2  
125.2  
125.1  
123.3  
116.4  
116.1  
115.6  
115.3  
105.0

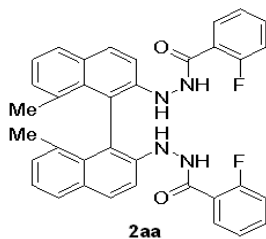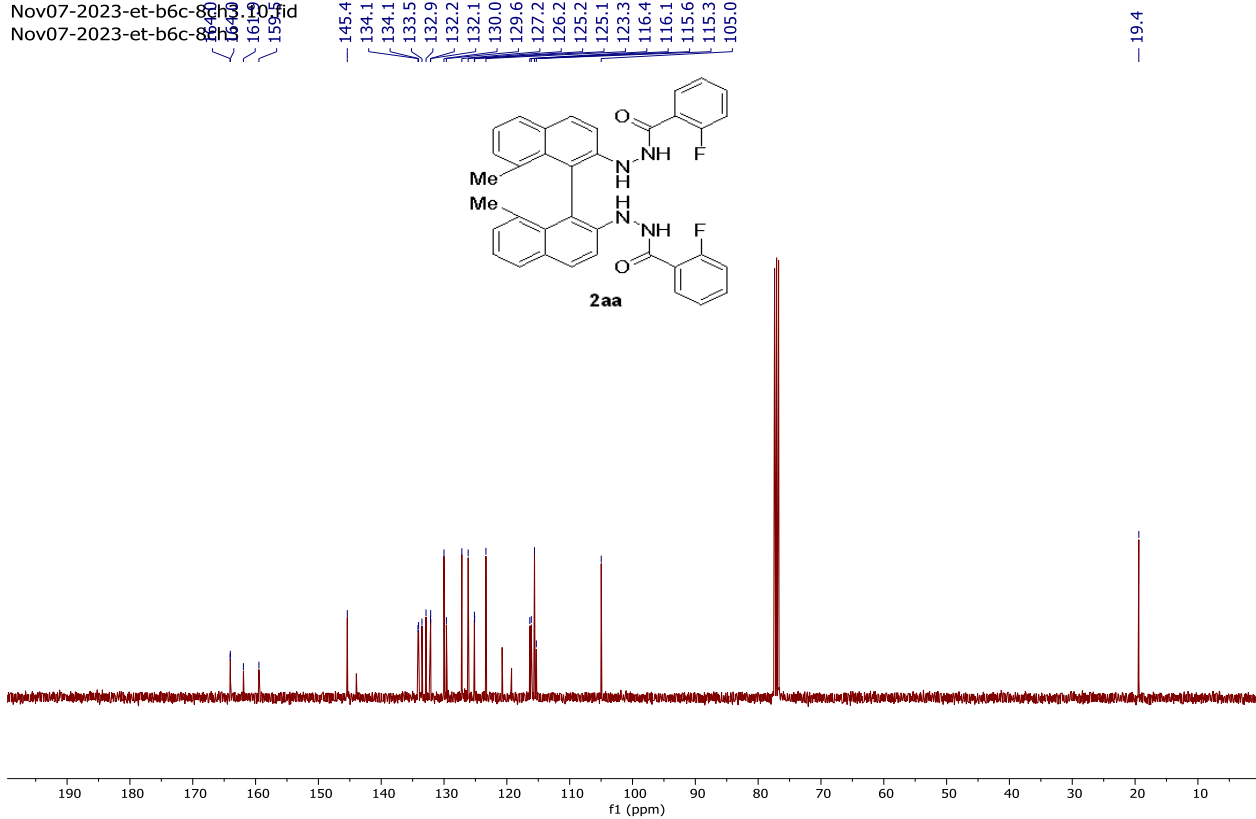

et-b6-4br-azcor-bnm-h.6.fid  
et-b6-4br-azcor-bnm-h

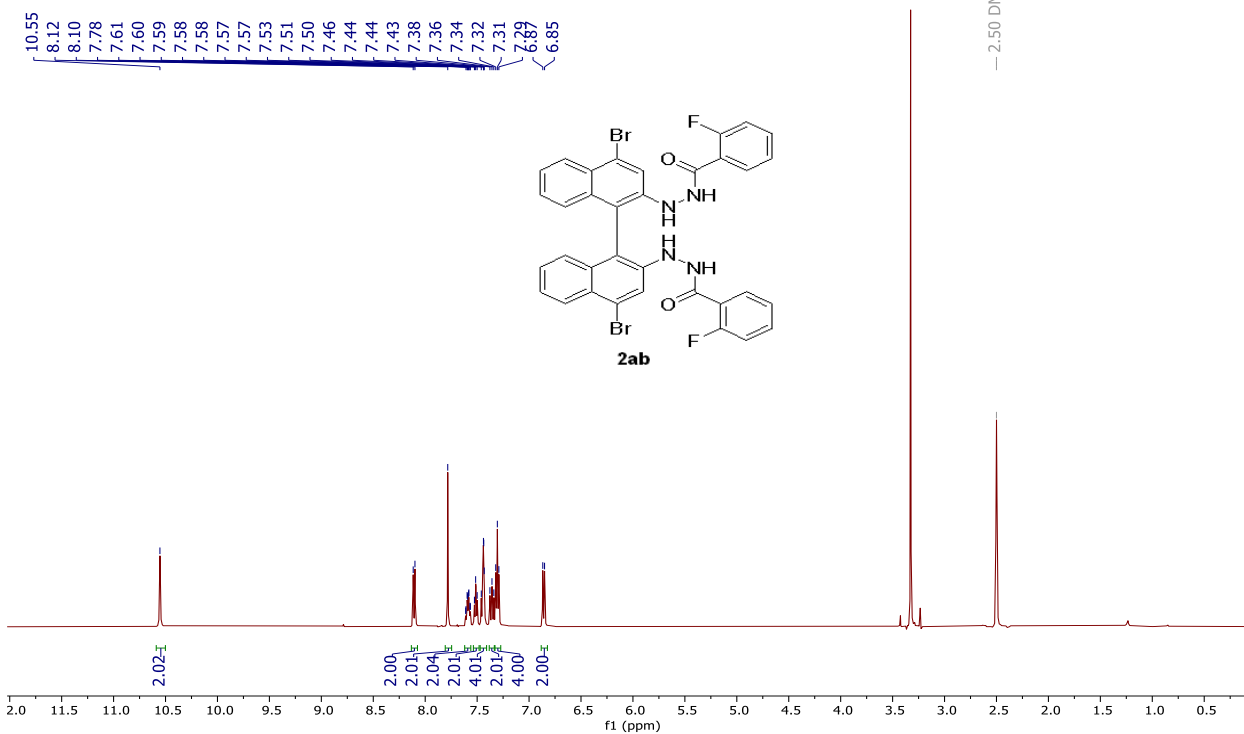

et-b6-4br-azcor-bnm-h.6.fid  
et-b6-4br-azcor-bnm-h

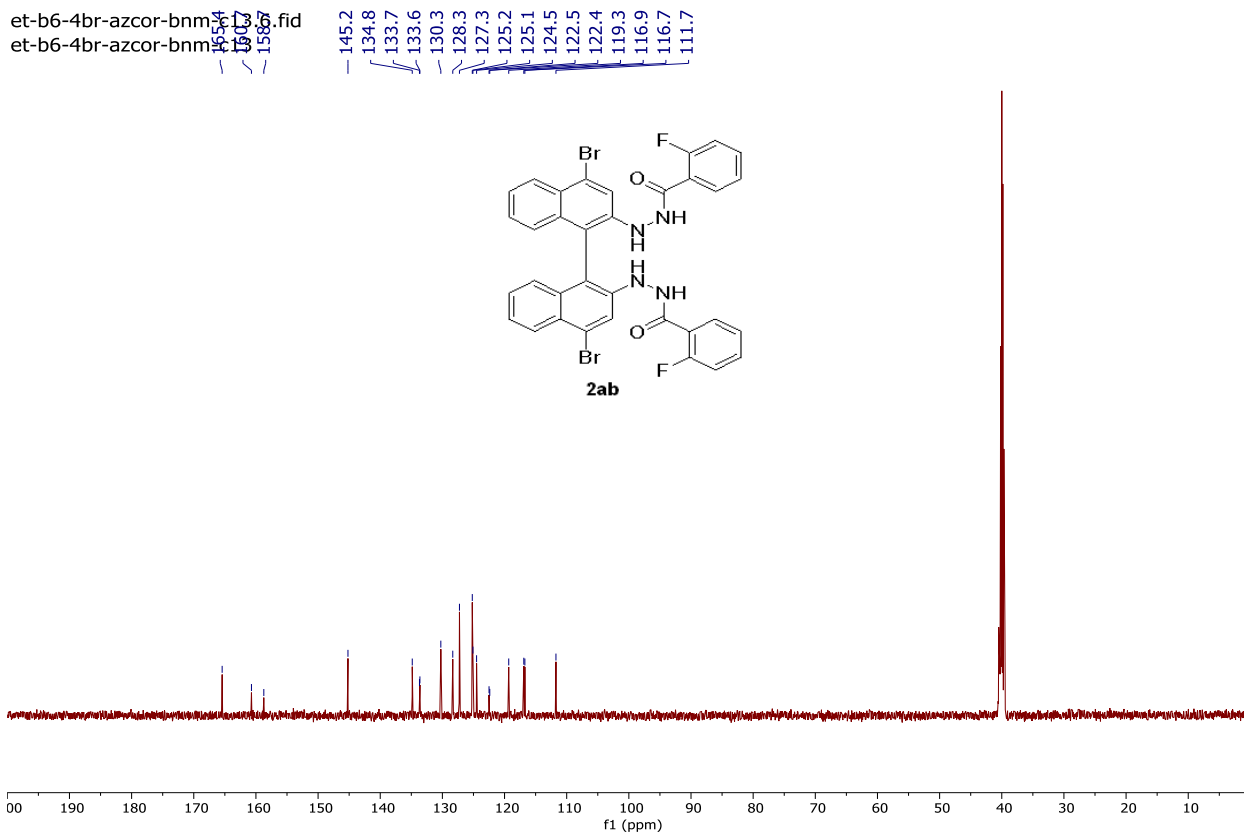

Nov06-2023-et-b6-ant-bm.10.fid  
 1H NMR (400 MHz, Chloroform-d) 8.57 (d, J = 12.4 Hz, 2H), 8.31 (s, 2H), 8.19 (s, 2H), 8.14 (dd, 2H), 8.09 (dd, 2H), 7.43 - 7.30 (m, 6H), 7.28 - 7.24 (m, 5H), 7.18 (dd, 2H).

8.59  
8.55  
8.31  
8.19  
8.15  
8.15  
8.13  
7.95  
7.92  
7.90  
7.88  
7.41  
7.41  
7.39  
7.39  
7.37  
7.37  
7.35  
7.35  
7.33  
7.33  
7.31  
7.31  
7.28  
7.26 CDCl3  
7.26  
7.25  
7.18  
7.17  
7.15

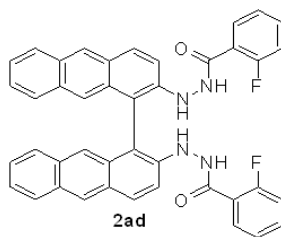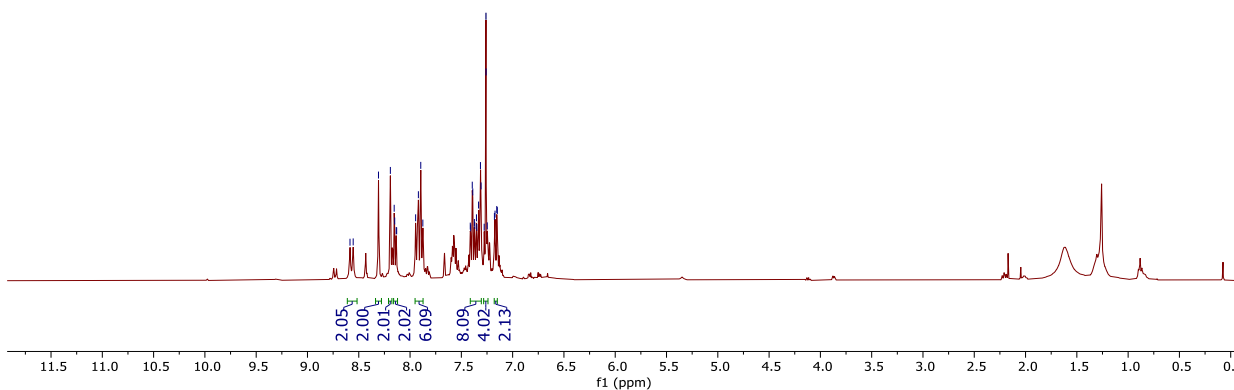

et-b6-ant-c13.6.fid  
 et-b6-ant-c13

163.7  
161.8  
159.8  
144.7  
134.2  
134.2  
132.3  
132.3  
130.8  
130.4  
129.9  
128.8  
128.3  
127.9  
127.7  
126.9  
126.3  
125.5  
125.2  
124.4  
124.2  
122.9  
117.7  
116.6  
116.3  
116.1  
106.0

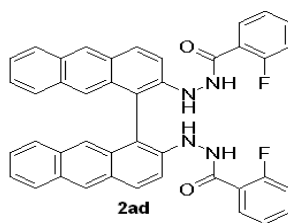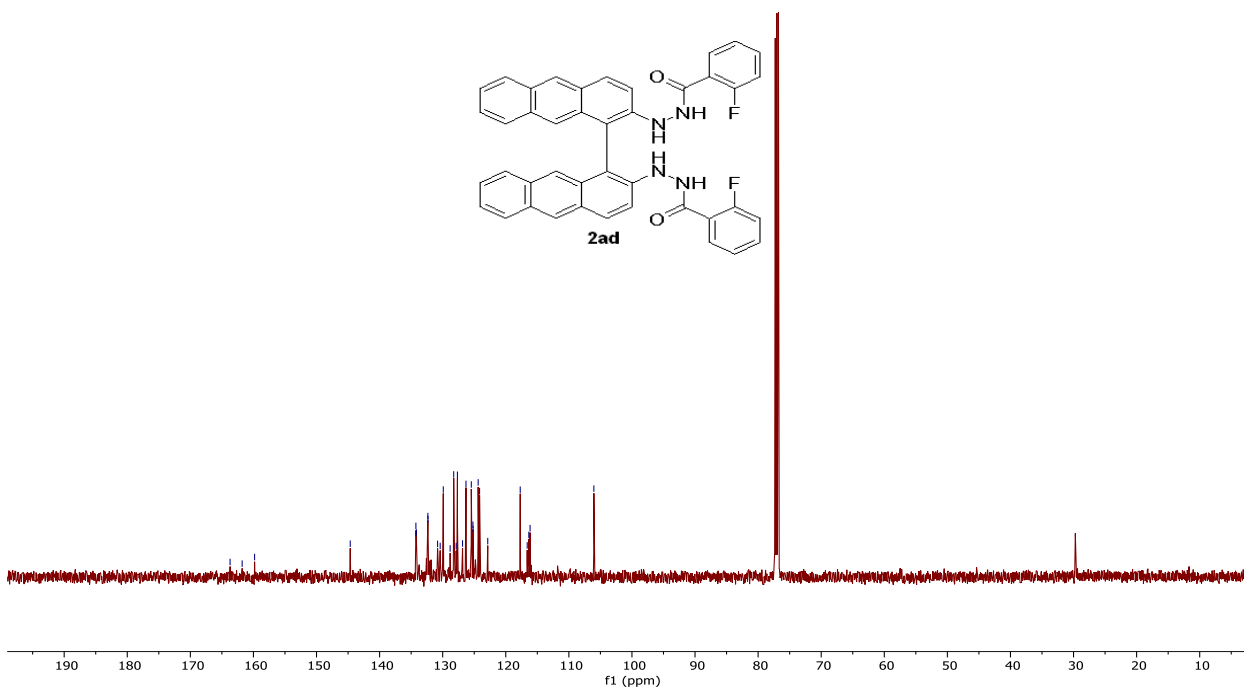

Aug23-2023-et-b6-bnmclv.10.fid  
Aug23-2023-et-b6-bnmclv

7.72  
7.72  
7.71  
7.70  
7.69  
7.17  
7.16  
7.15  
7.15  
7.14  
7.13  
7.13  
7.11  
7.11  
7.09  
7.09  
7.06  
7.04  
7.00  
6.98

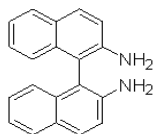

3a

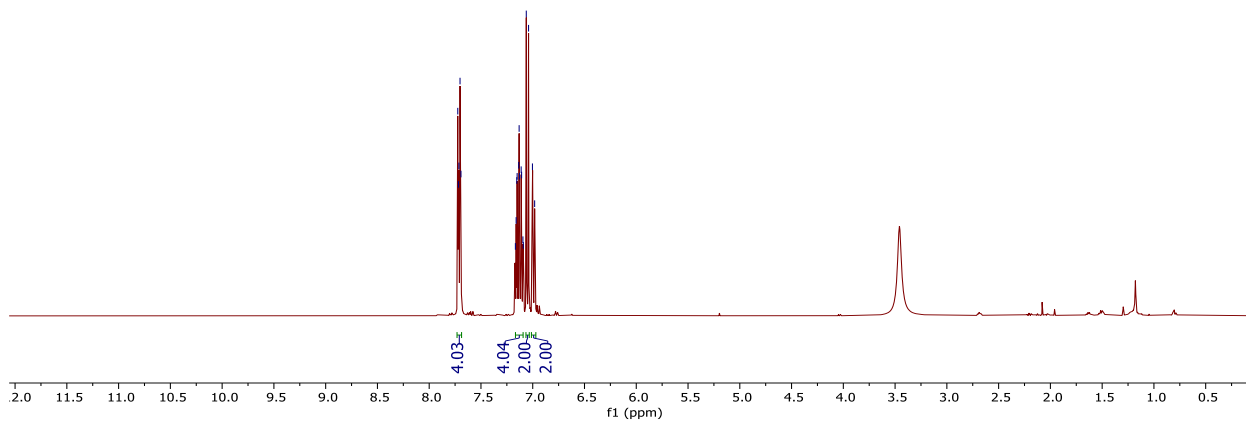

et-b6-bz-c13-clv.6.fid  
et-b6-bz-c13-clv

142.5  
133.7  
129.6  
128.6  
128.2  
126.9  
124.0  
122.5  
118.4  
112.8

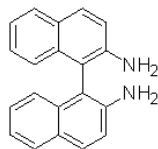

3a

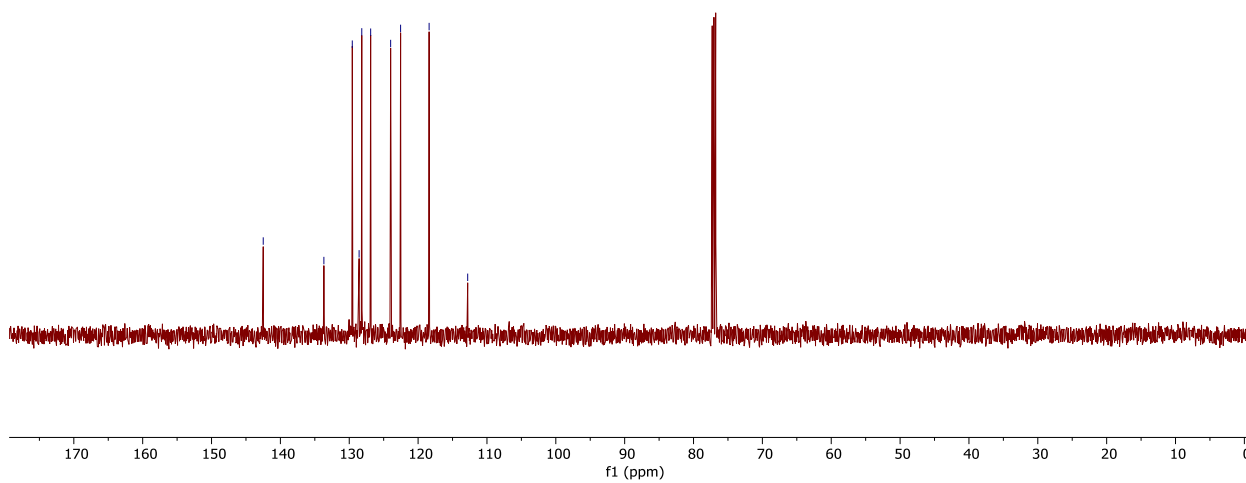

et-b6-6ome-clv.7.fid  
et-b6-6ome-clv

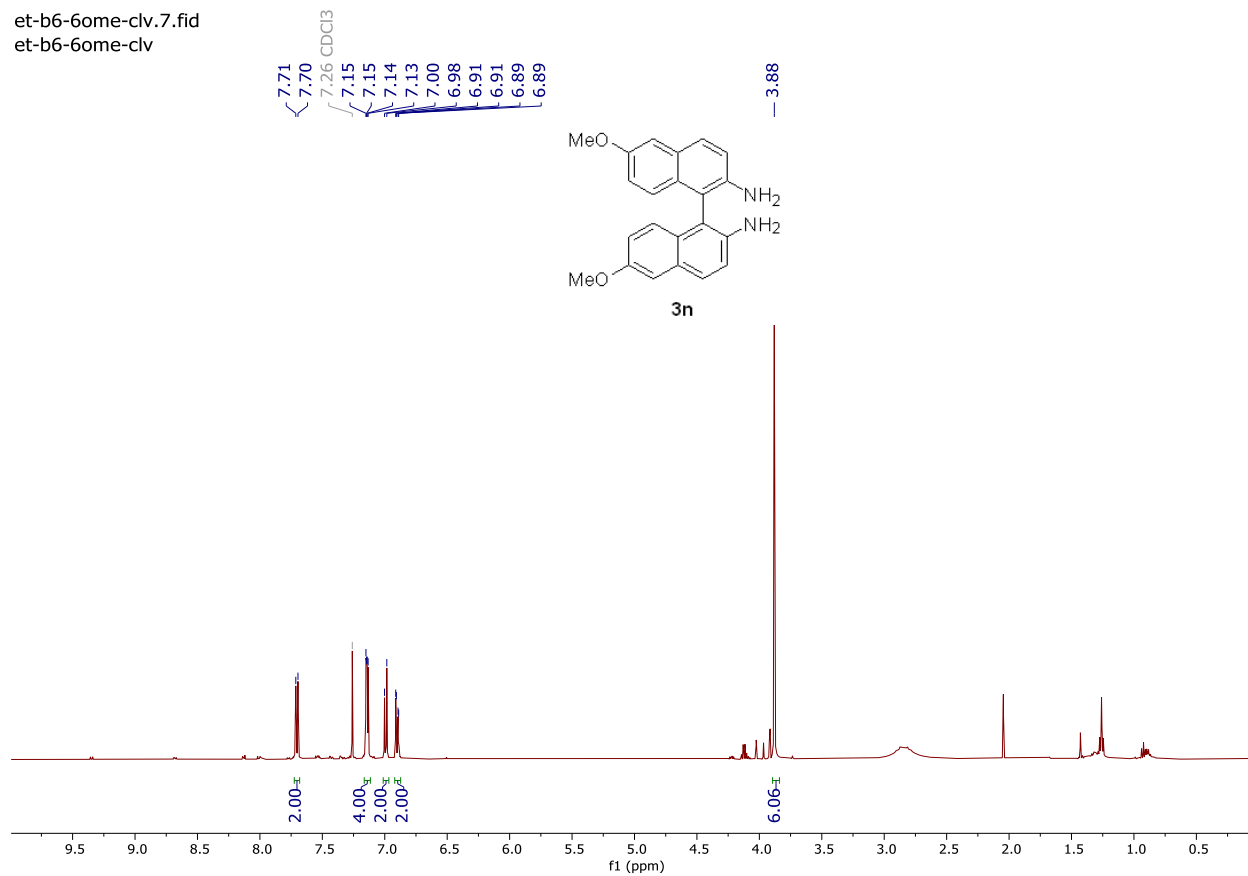

Nov07-2023-et-b6c-6ome-clv.10.fid  
Nov07-2023-et-b6c-6ome-clv

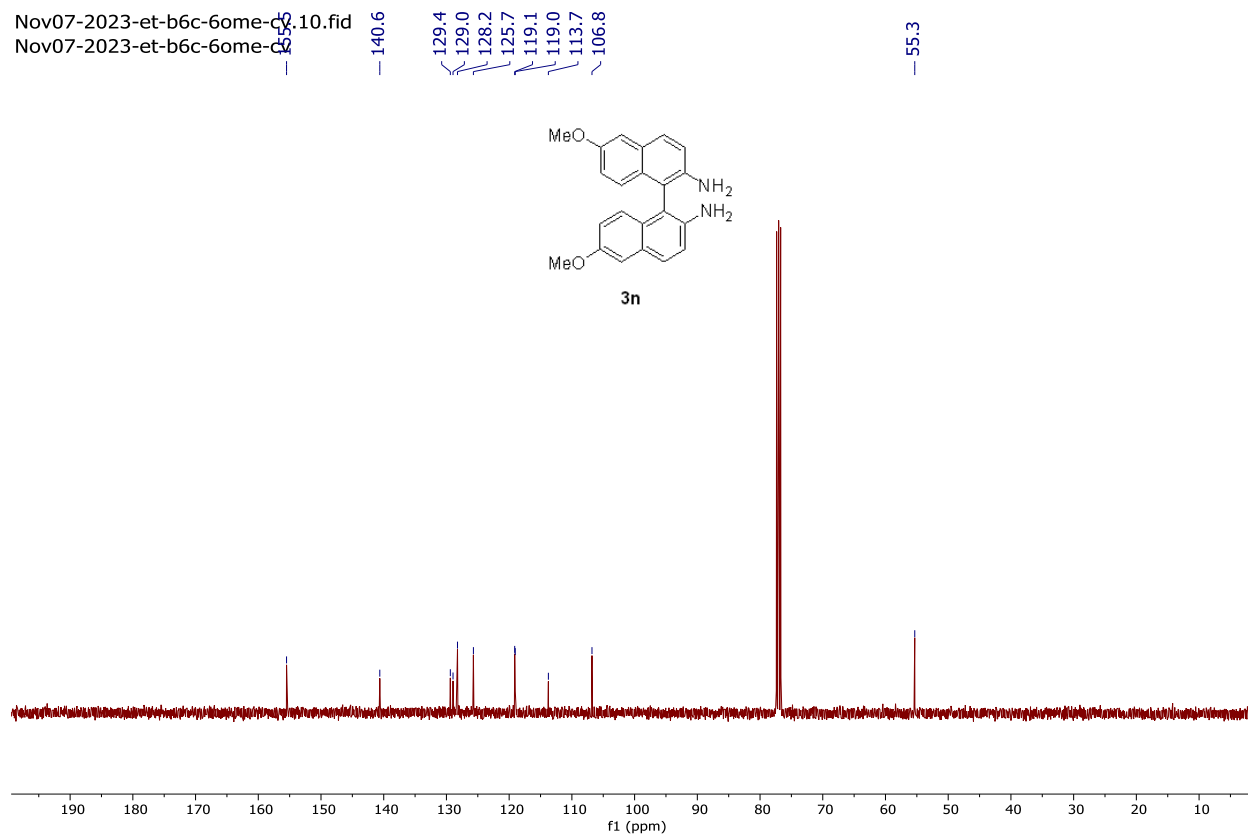

et-b6-6me-cv.7.fid  
et-b6-6me-cv

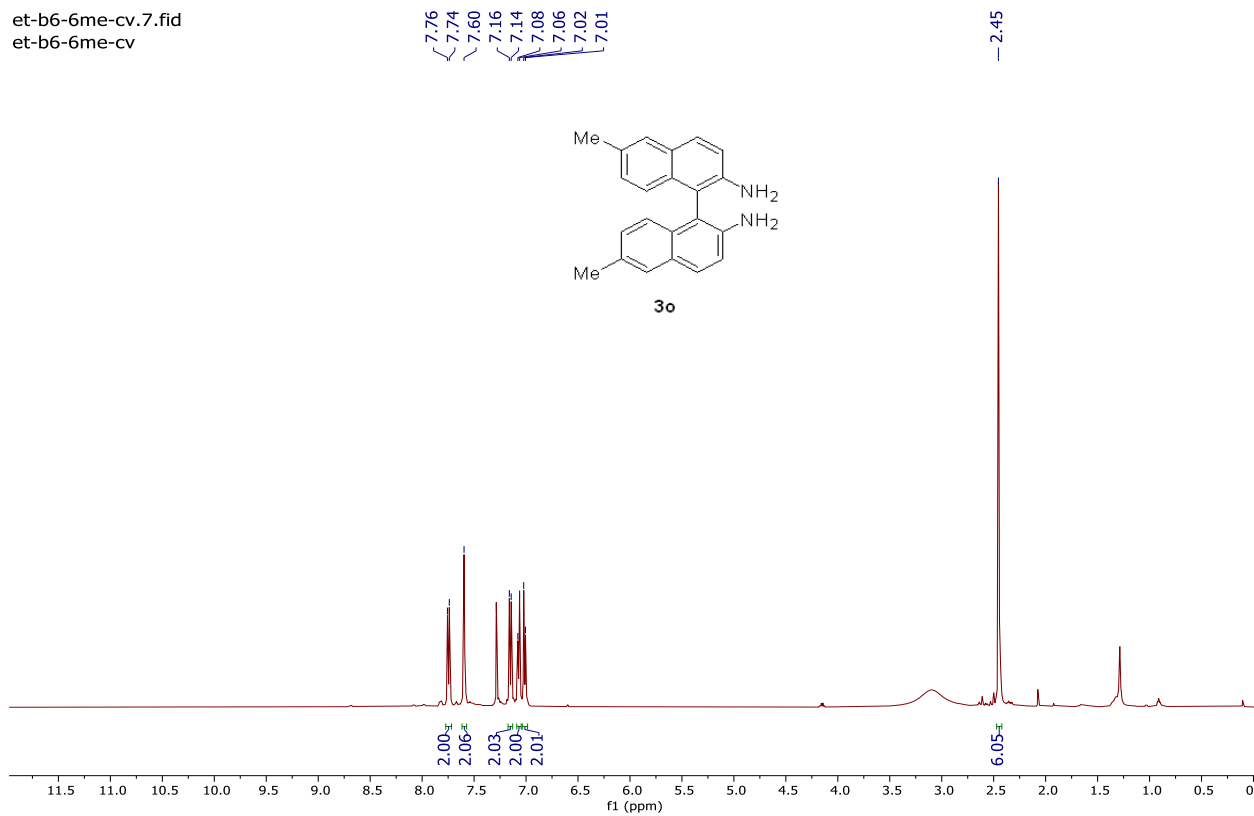

et-b6-6me-cv-c13.6.fid  
et-b6-6me-cv-c13

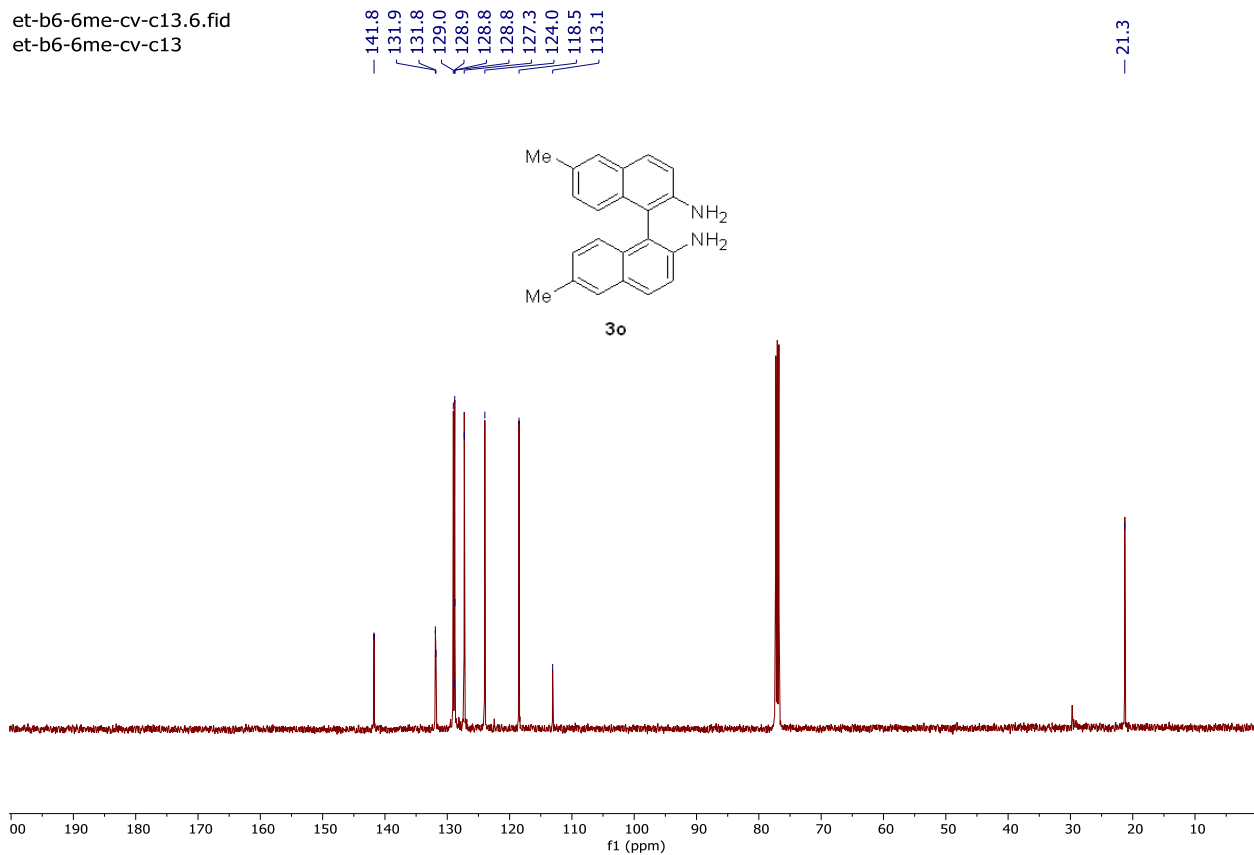



et-b6-6ph-clv.7.fid  
et-b6-6ph-clv

8.03  
7.90  
7.88  
7.68  
7.66  
7.52  
7.51  
7.50  
7.49  
7.46  
7.45  
7.43  
7.34  
7.33  
7.31  
7.26 CDCl<sub>3</sub>  
7.22  
7.21  
7.20  
7.19

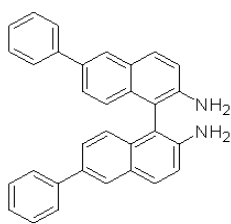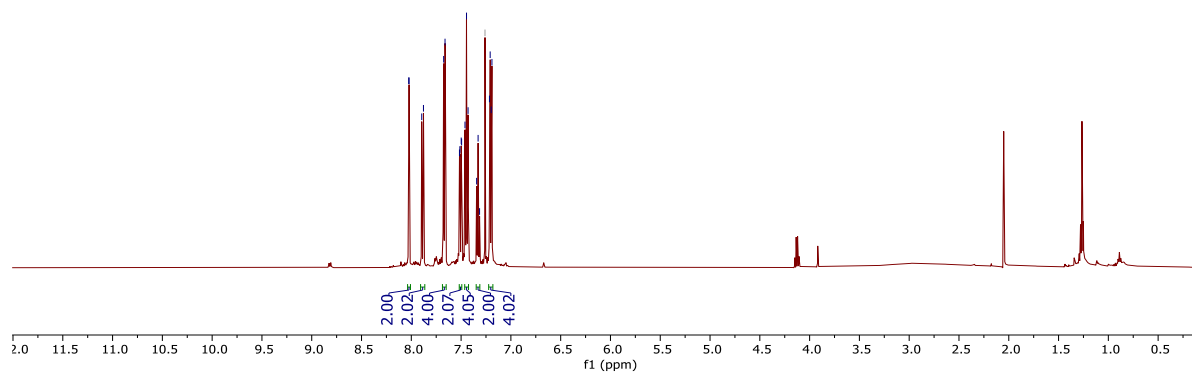

et-b6-6ph-cv-c13.6.fid  
et-b6-6ph-cv-c13

142.8  
141.3  
135.3  
132.9  
130.0  
128.8  
127.1  
126.9  
126.5  
126.2  
124.5  
118.8  
112.4

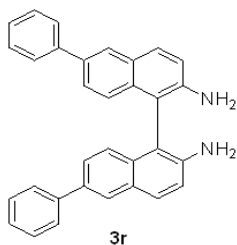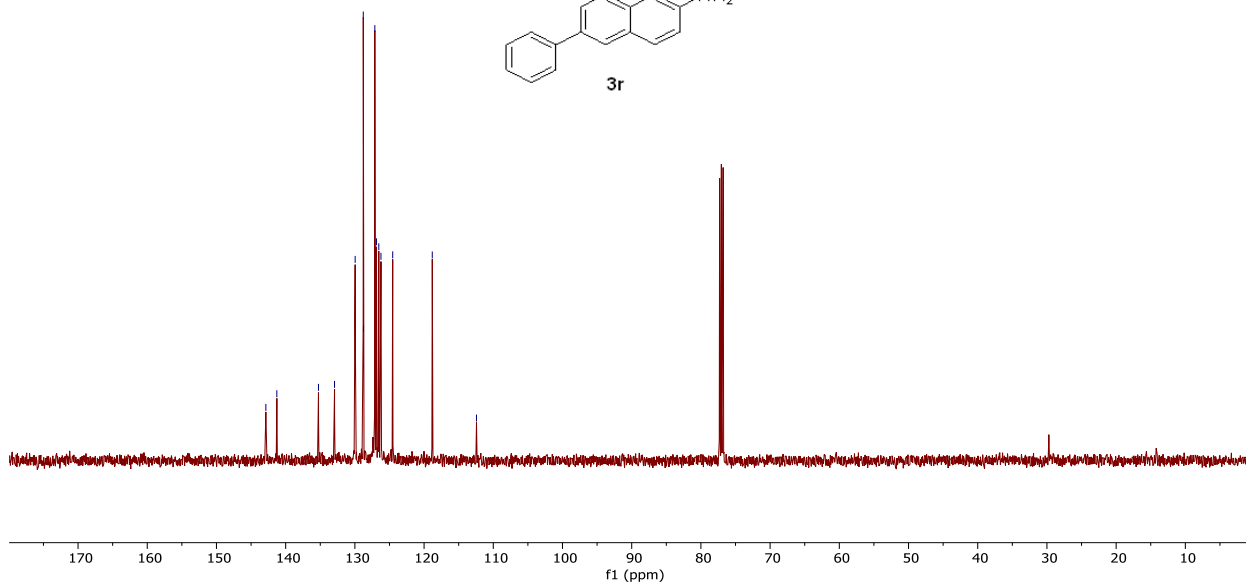

Supplement: d4sc06273f1.pdf [file d4sc06273f1.pdf]
